# Supplementary material for: High Diversity in Urban Areas: How Comprehensive Sampling Reveals High Ant Species Richness within One of the Most Urbanized Regions of the World
Source: MDPI journal article supplement (doi:10.3390/d13080358), 2021-08-04
Supplement: s1 [file s1]

Supplementary material (Figure S1–S2, Table S1–S2, material examined)

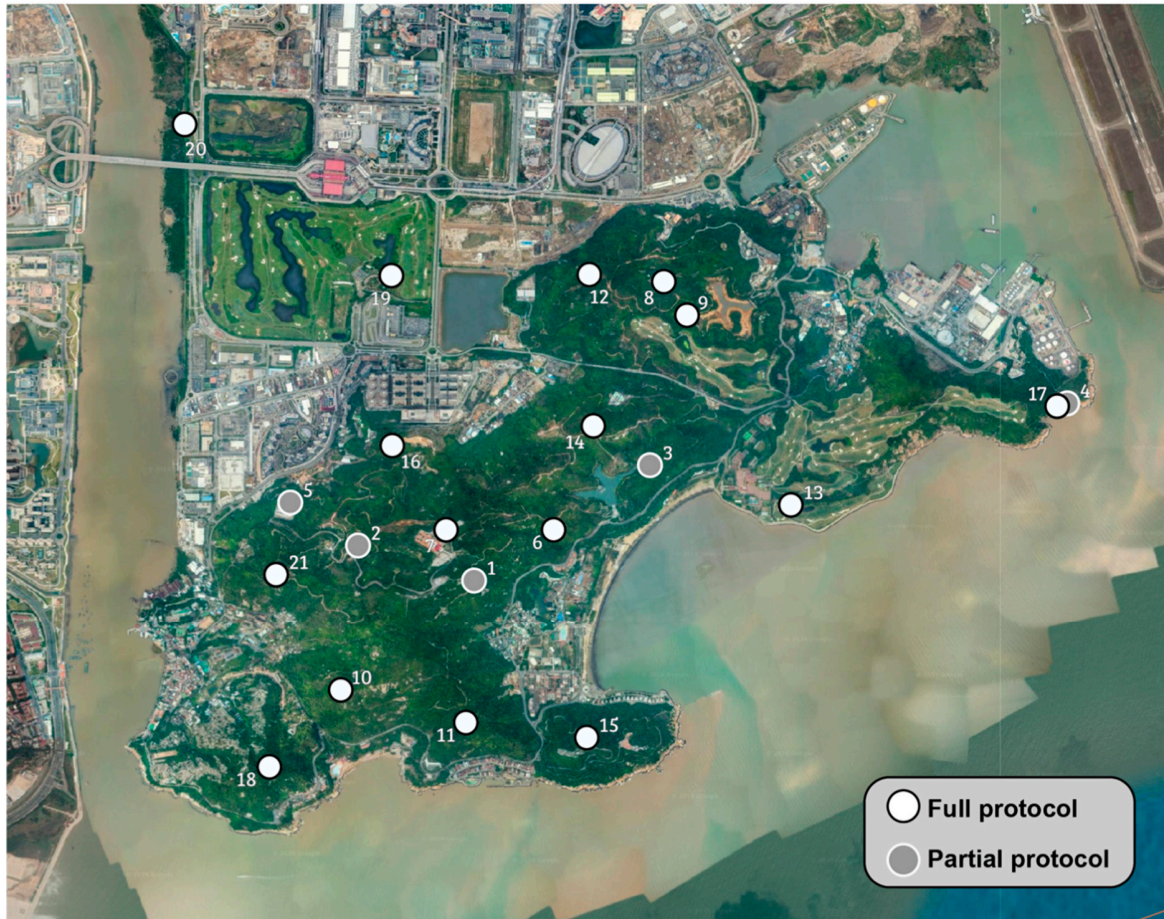

Figure S1. Map of Coloane showing the 21 sites sampled in the 2019 survey. White dots mark sites where the full protocol was performed (i.e., standardized and species pool leaf litter extractions, ground baiting, ground nests, subterranean traps, and arboreal traps), whereas grey dots mark preliminary sites where only ground baiting and leaf litter extractions were performed. Hand collection was also opportunistically used at each site.

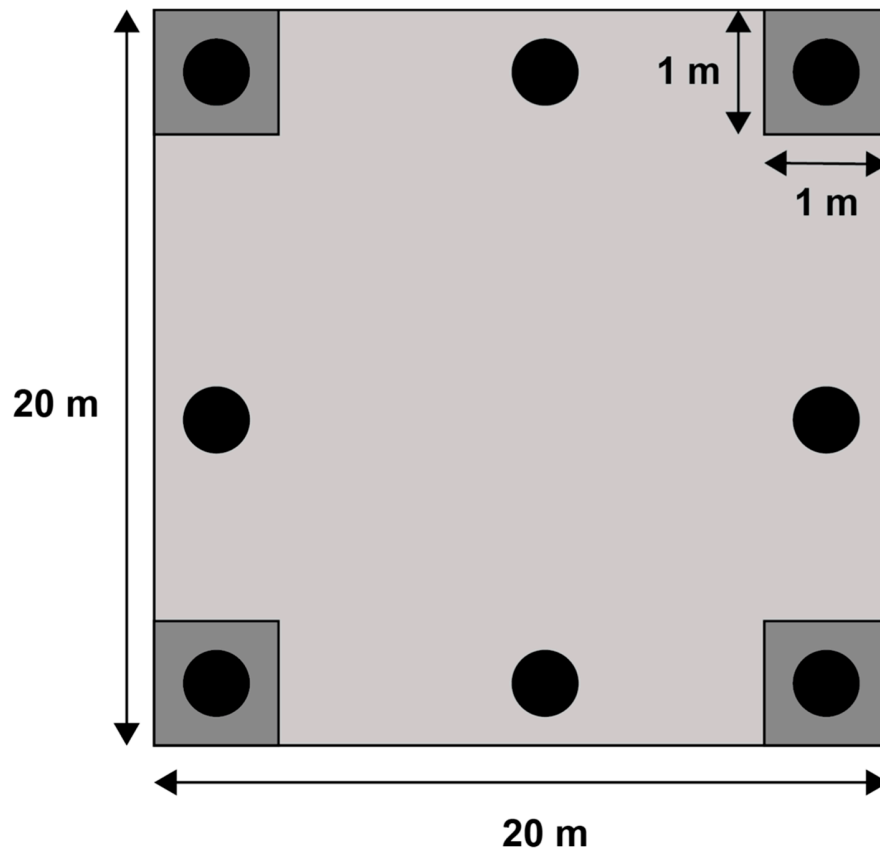

Figure S2. Design of a 20 x 20 m sampling plot. Each of the 1x1m quadrats in which subterranean traps and leaf litter extraction (standardized area) was performed were placed at a corner of the plot. Black dots show the emplacement of nest bundles. For the species pool leaf litter extraction, 12 microhabitats were sampled within the light gray area. For the arboreal baiting protocol, four trees measuring a minimum of 5 m height were sampled within the grey area.

**Table S1.** List of the localities of each sampling sites, their associated number, and their geolocation. The date refers to the first sampling event made at a site, which corresponded to leaf litter extraction and placement of subterranean traps. Sampling protocols are defined as follows: the letter (P) signifies a partial sampling protocol (i.e., leaf litter extraction, ground baiting, and hand collection), whereas the letter (F) signifies a full protocol (i.e., leaf litter extraction, ground baiting, ground nests, subterranean traps, arboreal traps, and hand collection).

| <i>Site #</i> | <i>Site name</i>                                            | <i>Latitude</i> | <i>Longitude</i> | <i>Elevation</i> | <i>Date</i> | <i>Protocol</i> |
|---------------|-------------------------------------------------------------|-----------------|------------------|------------------|-------------|-----------------|
| 1             | Coloane Trail (Path near C13 information point)             | 22.1214         | 113.5649         | ca. 110          | 18-III-2019 | P               |
| 2             | Wetland in Alto de Coloane                                  | 22.1230         | 113.5597         | ca. 90           | 19-III-2019 | P               |
| 3             | Hac Sá Reservoir Family Trail (Near C21 information point)  | 22.1266         | 113.5727         | ca. 70           | 19-III-2019 | P               |
| 4             | Ká-Hó Lighthouse 1                                          | 22.1294         | 113.5914         | ca. 30           | 20-III-2019 | P               |
| 5             | Seac Pai Van Park                                           | 22.1249         | 113.5566         | ca. 40           | 20-III-2019 | P               |
| 6             | Hac Sá Reservoir Family Trail (Near 1-05-12 distance post)  | 22.1237         | 113.5684         | ca. 90           | 8-IV-2019   | F               |
| 7             | Estátua da Deusa A-ma                                       | 22.1237         | 113.5636         | ca. 160          | 8-IV-2019   | F               |
| 8             | Ká-Hó Reservoir Freshwater Wetland                          | 22.1348         | 113.5733         | ca. 50           | 9-IV-2019   | F               |
| 9             | Ká-Hó Reservoir Hillside                                    | 22.1333         | 113.5744         | ca. 90           | 9-IV-2019   | F               |
| 10            | Coloane Trail (Near 1-01-10 distance post)                  | 22.1165         | 113.5589         | ca. 100          | 10-IV-2019  | F               |
| 11            | Coloane Trail (Near 1-01-15 distance post)                  | 22.1151         | 113.5645         | ca. 80           | 11-IV-2019  | F               |
| 12            | Coloane North East Hiking Trail                             | 22.1351         | 113.5700         | ca. 80           | 14-V-2019   | F               |
| 13            | Macao Golf & Country Club                                   | 22.1248         | 113.5790         | ca. 20           | 15-V-2019   | F               |
| 14            | Ká Hó Height Family Trail Peak (Near 1-09-03 distance post) | 22.1284         | 113.5702         | ca. 140          | 16-V-2019   | F               |
| 15            | Morro de Hac Sá Family Trail (Near 1-07-08 distance post)   | 22.1144         | 113.5699         | ca. 50           | 17-V-2019   | F               |
| 16            | Hillside of Department of Green Areas and Gardens           | 22.1275         | 113.5612         | ca. 70           | 20-V-2019   | F               |
| 17            | Ká-Hó Lighthouse 2                                          | 22.1292         | 113.5909         | ca. 30           | 21-V-2019   | F               |
| 18            | Oscar Farm Hillside                                         | 22.1131         | 113.5557         | ca. 80           | 24-VI-2019  | F               |
| 19            | Caesars Golf Macau                                          | 22.1351         | 113.5612         | ca. 10           | 25-VI-2019  | F               |
| 20            | Cotai Ecological Zone II                                    | 22.1418         | 113.5519         | ca. 0            | 26-VI-2019  | F               |
| 21            | Coloane Trail (Near C3 information point)                   | 22.1217         | 113.5560         | ca. 110          | 27-VI-2019  | F               |

**Table S2** Sociometry data collected using ground nests.

| Species              |                         | Worker<br>number | Major<br>number | Queen<br>number | Female<br>alate | Male<br>number | Colony<br>size<br>(adults) | Larvae<br>number | Pupae<br>number |
|----------------------|-------------------------|------------------|-----------------|-----------------|-----------------|----------------|----------------------------|------------------|-----------------|
| <i>Crematogaster</i> | <i>quadriruga</i>       | 211              | 0               | 1               | 0               | 0              | 212                        | 88               | 8               |
| <i>Monomorium</i>    | <i>intrudens</i>        | 1216             | 0               | 2               | 0               | 0              | 1218                       | 1993             | 1135            |
| <i>Monomorium</i>    | <i>intrudens</i>        | 290              | 0               | 1               | 0               | 0              | 291                        | 0                | 0               |
| <i>Monomorium</i>    | psw-cn01                | 53               | 0               | 1               | 0               | 0              | 54                         | 68               | 22              |
| <i>Nylanderia</i>    | <i>sharpai</i>          | 57               | 0               | 0               | 0               | 5              | 62                         | 14               | 1               |
| <i>Nylanderia</i>    | <i>sharpai</i>          | 21               | 0               | 1               | 0               | 0              | 22                         | 9                | 9               |
| <i>Nylanderia</i>    | sp.3 BG                 | 41               | 0               | 0               | 0               | 0              | 40                         | 16               | 9               |
| <i>Nylanderia</i>    | <i>taylori</i>          | 80               | 0               | 0               | 0               | 0              | 80                         | 33               | 23              |
| <i>Nylanderia</i>    | <i>taylori</i>          | 69               | 0               | 0               | 0               | 0              | 69                         | 25               | 11              |
| <i>Pheidole</i>      | <i>tumida</i>           | 43               | 2               | 1               | 0               | 0              | 44                         | 14               | 20              |
| <i>Pheidole</i>      | <i>tumida</i>           | 5                | 0               | 1               | 0               | 0              | 6                          | 1                | 2               |
| <i>Pheidole</i>      | <i>megacephala</i>      | 23               | 2               | 0               | 0               | 0              | 23                         | 0                | 0               |
| <i>Strumigenys</i>   | <i>minutula</i>         | 135              | 0               | 2               | 0               | 0              | 137                        | 8                | 12              |
| <i>Tapinoma</i>      | <i>melanocephalum</i>   | 29               | 0               | 2               | 0               | 0              | 31                         | 22               | 12              |
| <i>Tapinoma</i>      | <i>melanocephalum</i>   | 19               | 0               | 1               | 0               | 0              | 20                         | 4                | 9               |
| <i>Technomyrmex</i>  | <i>horni</i>            | 317              | 0               | 0               | 0               | 0              | 317                        | 109              | 118             |
| <i>Tetramorium</i>   | <i>kraepelini</i>       | 199              | 0               | 5               | 0               | 0              | 204                        | 27               | 0               |
| <i>Tetramorium</i>   | <i>kraepelini</i>       | 247              | 0               | 4               | 0               | 0              | 251                        | 13               | 0               |
| <i>Tetramorium</i>   | <i>kraepelini</i>       | 255              | 0               | 2               | 0               | 0              | 257                        | 53               | 0               |
| <i>Tetramorium</i>   | <i>kraepelini</i>       | 122              | 0               | 2               | 0               | 0              | 124                        | 45               | 8               |
| <i>Tetramorium</i>   | <i>kraepelini</i>       | 187              | 0               | 1               | 0               | 0              | 188                        | 2                | 1               |
| <i>Tetramorium</i>   | <i>nipponense</i>       | 205              | 0               | 5               | 3               | 0              | 213                        | 64               | 25              |
| <i>Tetramorium</i>   | <i>nipponense</i>       | 570              | 0               | 62              | 21              | 0              | 653                        | 104              | 29              |
| <i>Tetramorium</i>   | <i>nipponense</i>       | 415              | 0               | 27              | 4               | 0              | 446                        | 58               | 10              |
| <i>Tetramorium</i>   | sp.1 BG<br>(obesum grp) | 28               | 0               | 4               | 1               | 0              | 33                         | 12               | 7               |
| <i>Tetramorium</i>   | sp.1 BG<br>(obesum grp) | 36               | 0               | 1               | 0               | 0              | 37                         | 19               | 16              |
| <i>Tetramorium</i>   | sp.1 BG<br>(obesum grp) | 11               | 0               | 12              | 0               | 0              | 23                         | 2                | 1               |

### ***Macao species: material examined***

The following describes the material examined to produce the updated Macao species checklist. It mostly includes the specimens collected during the 2019 survey, but also information on specimens not collected in 2019 which were new records or specimens used for imaging purposes. 9gpm5zgh

### **AMBLYOPONINAE**

#### ***Stigmatomma* sp. nr. *rothneyi* Forel, 1900**

##### **Material examined.**

- MACAO SAR, CHINA • 2 workers; Macao, Coloane Island, Hac Sa Reservoir near C21, 22.12659N 113.57272E, ca 69 m, 19III2019, MAC\_S03\_LLSA\_Sp.7, F. Brassard leg., Leaf litter extraction (standardized area), IBBL
- 1 worker; Macao, Coloane Island, Coloane Trail near 1-01-15, 22.11507N 113.56448E, ca 83 m, 11IV2019, MAC\_S11\_LLSA\_Sp.2, F. Brassard leg., Leaf litter extraction (standardized area), IBBL
  - 2 workers; Macao, Coloane Island, Hac Sa Reservoir near C21, 22.12659N 113.57272E, ca 69 m, 19III2019, MAC\_S03\_LLSP\_Sp.2, F. Brassard leg., Leaf litter extraction (species pool), IBBL
  - 1 worker; Macao, Guia Hill, 9VIII2019, CM. Leong leg.
  - 1 worker; Macao, Guia Hill, 27VIII2016, CM. Leong leg.
  - 1 male; Macao, Guia Hill, 27VIII2016, CM. Leong leg.

### **DOLICHODERINAE**

#### ***Chronoxenus* morpho 1**

##### **Material examined.**

- MACAO SAR, CHINA • 2 workers; Macao, Coloane Island, Ka Ho Reservoir Hillside, 22.13328N 113.57437E, ca 85 m, 9IV2019, MAC\_S09\_LLSA\_Sp.4, F. Brassard leg., Leaf litter extraction (standardized area), IBBL
- 1 worker; Macao, Coloane Island, Hillside Department of Green Areas and Gardens, 22.12747N 113.56118E, ca 69 m, 20V2019, MAC\_S16\_LLSA\_Sp.5, F. Brassard leg., Leaf litter extraction (standardized area), IBBL
  - 2 workers; Macao, Coloane Island, Ka Ho Height Family Trail Peak near 1-09-03, 22.12835N 113.57018E, ca 140 m, 16V2019, MAC\_S14\_LLSP\_Sp.10, F. Brassard leg., Leaf litter extraction (species pool), IBBL
  - 2 workers; Macao, Coloane Island, Ka Ho Reservoir Hillside, 22.13328N 113.57437E, ca 85 m, 9IV2019-24IV2019, MAC\_S9\_25\_q3\_Sp.1, F. Brassard leg., Subterranean trap, IBBL

#### ***Chronoxenus* morpho 2**

##### **Material examined.**

- MACAO SAR, CHINA • 2 workers; Macao, Coloane Island, Coloane Trail near C3, 22.1217N 113.556E, ca 105 m, 27VI2019, MAC\_S21\_LLSP\_Sp.7, F. Brassard leg., Leaf litter extraction (species pool), IBBL
- 2 workers; Macao, Coloane Island, Coloane Trail near C3, 22.1217N 113.556E, ca 105 m, 27VI2019-10VII2019, MAC\_S21\_q1\_50\_Sp.2, F. Brassard leg., Subterranean trap, IBBL
  - 2 workers; Macao, Coloane Island, Coloane Trail near C3, 22.1217N 113.556E, ca 105 m, 27VI2019-10VII2019, MAC\_S21\_q2\_50\_Sp.2, F. Brassard leg., Subterranean trap, IBBL

#### ***Dolichoderus* sp. nr. *sibiricus* Emery, 1889**

**Material examined.** MACAO SAR, CHINA • 1 worker; Macao, Coloane Island, 22.1217N 113.556E, ca 105 m, 9X2019, FB19279, F. Brassard leg., Hand collection, IBBL • 1 worker; Macao, Ecological Protection Area I & II, 12I2017, CM. Leong leg. • 1 worker; Macao, Hac Sa Reservoir, 29VII2015, CM. Leong leg.

#### ***Iridomyrmex* anceps cplx Roger, 1863**

**Material examined.** MACAO SAR, CHINA • 2 workers; Macao, Coloane Island, Seaside Cliffs, 22.12923N 113.59092E, ca 30 m, 21V2019, FB19166, F. Brassard leg., Hand collection, IBBL

***Ochetellus glaber* Mayr, 1862**

**Material examined.** MACAO SAR, CHINA • 1 worker; Macao, Coloane Island, Caesar Golf Center, 22.13505N 113.56115E, ca 7 m, 25VI2019, MAC\_S19\_LLSA\_Sp.8, F. Brassard leg., Leaf litter extraction (standardized area), IBBL • 2 workers; Macao, Coloane Island, Caesar Golf Center, 22.13505N 113.56115E, ca 7 m, 25VI2019, MAC\_S19\_LLSP\_Sp.5, F. Brassard leg., Leaf litter extraction (species pool), IBBL • 1 worker; Macao, Guia Hill, 28VII2015, CM. Leong leg. • 3 workers; Macao, Ecological Protection Area I & II, 12I2017, CM. Leong leg.

***Tapinoma indicum* Forel, 1895**

**Material examined.** MACAO SAR, CHINA • 2 workers; Macao, Coloane Island, Oscar Farm hillside, 22.1131N 113.5557E, ca 83 m, 24VI2019-8VII2019, MAC\_S18\_q2\_12.5\_Sp.1, F. Brassard leg., Subterranean trap, IBBL • 2 workers; Macao, Coloane Island, Ka Ho Lighthouse 1, 22.12936N 113.59137E, ca 26 m, 20III2019, MAC\_S04\_LLSA\_Sp.7, F. Brassard leg., Leaf litter extraction (standardized area), IBBL • 1 worker; Macao, Coloane Island, Hac Sa Reservoir Family Trail near 1-05-12, 22.1237N 113.5684E, ca 91 m, 8IV2019, MAC\_S06\_LLSA\_Sp.5, F. Brassard leg., Leaf litter extraction (standardized area), IBBL • 1 worker; Macao, Coloane Island, Oscar Farm hillside, 22.1131N 113.5557E, ca 83 m, 24VI2019, MAC\_S18\_LLSA\_Sp.2, F. Brassard leg., Leaf litter extraction (standardized area), IBBL

- 1 worker; Macao, Coloane Island, Coloane Trail near C3, 22.1217N 113.556E, ca 105 m, 27VI2019, MAC\_S21\_LLSA\_Sp.3, F. Brassard leg., Leaf litter extraction (standardized area), IBBL
- 2 workers; Macao, Coloane Island, Coloane Trail near C13, 22.12144N 113.56485E, ca 107 m, 18III2019, MAC\_S01\_LLSP\_sp.8, F. Brassard leg., Leaf litter extraction (species pool), IBBL
- 2 workers; Macao, Coloane Island, Ka Ho Lighthouse 1, 22.12936N 113.59137E, ca 26 m, 20III2019, MAC\_S04\_LLSP\_Sp.1, F. Brassard leg., Leaf litter extraction (species pool), IBBL
- 1 worker; Macao, Coloane Island, Coloane Trail near 1-01-15, 22.11507N 113.56448E, ca 83 m, 11IV2019, MAC\_S11\_LLSP\_Sp.11, F. Brassard leg., Leaf litter extraction (species pool), IBBL
- 2 workers; Macao, Coloane Island, Oscar Farm hillside, 22.1131N 113.5557E, ca 83 m, 24VI2019, MAC\_S18\_LLSP\_Sp.2, F. Brassard leg., Leaf litter extraction (species pool), IBBL
- 1 worker; Macao, Coloane Island, Oscar Farm hillside, 22.1131N 113.5557E, ca 83 m, 24VI2019, MAC\_S18\_LLSP\_Sp.4, F. Brassard leg., Leaf litter extraction (species pool), IBBL
- 2 workers; Macao, Coloane Island, Ka Ho Reservoir Freshwater Wetland, 22.13478N 113.57333E, ca 54 m, 9IV2019-24IV2019, MAC\_S8\_12.5\_q4\_Sp.1, F. Brassard leg., Subterranean trap, IBBL
- 1 worker; Macao, Coloane Island, Ka Ho Reservoir Hillside, 22.13328N 113.57437E, ca 85 m, 9IV2019-24IV2019, MAC\_S9\_25\_q2\_Sp.3, F. Brassard leg., Subterranean trap, IBBL
- 1 worker; Macao, Coloane Island, Ka Ho Lighthouse 2, 22.12923N 113.59092E, ca 34 m, 21V2019-6VI2019, MAC\_S17\_25\_q4\_Sp.1, F. Brassard leg., Subterranean trap, IBBL
- 2 workers; Macao, Coloane Island, Caesar Golf Center, 22.13505N 113.56115E, ca 7 m, 25VI2019-10VII2019, MAC\_S19\_q4\_GL\_03\_Sp.1, F. Brassard leg., Subterranean trap, IBBL • 1 worker; Macao, Siu Tam Hill, 5VIII2015, CM Leong leg. • 1 worker; Macao, Hac Sa Reservoir, 20.VIII.2016, CM Leong leg. • 1 queen; Macao, Ilha Verde Hill, 25.I.2017, CM Leong leg

***Tapinoma melanocephalum* Fabricius, 1793**

**Material examined.** MACAO SAR, CHINA

- 1 worker; Macao, Coloane Island, Hac Sa Reservoir Family Trail near 1-05-12, 22.1237N 113.5684E, ca 91 m, 23IV2019-7VIII2019, MAC\_S6\_GN2\_H3\_n1, F. Brassard leg., Ground nest, IBBL

- 1 queen; Macao, Coloane Island, Hac Sa Reservoir Family Trail near 1-05-12, 22.1237N 113.5684E, ca 91 m, 23IV2019-7VIII2019, MAC\_S6\_GN2\_H3\_n1, F. Brassard leg., Ground nest, IBBL
- 1 worker; Macao, Coloane Island, Ka Ho Lighthouse 2, 22.12923N 113.59092E, ca 34 m, 6VI2019-24IX2019, MAC\_S17\_GN3\_H3\_n1, F. Brassard leg., Ground nest, IBBL
- 1 queen; Macao, Coloane Island, Ka Ho Lighthouse 2, 22.12923N 113.59092E, ca 34 m, 6VI2019-24IX2019, MAC\_S17\_GN3\_H3\_n1, F. Brassard leg., Ground nest, IBBL
- 1 worker; Macao, Coloane Island, Wetland Alto de Coloane, 22.123N 113.55966E, ca 93 m, 19III2019, MAC\_S02\_LLSA\_Sp.6, F. Brassard leg., Leaf litter extraction (standardized area), IBBL
- 1 worker; Macao, Coloane Island, Hac Sa Reservoir near C21, 22.12659N 113.57272E, ca 69 m, 19III2019, MAC\_S03\_LLSA\_Sp.3, F. Brassard leg., Leaf litter extraction (standardized area), IBBL
- 2 workers; Macao, Coloane Island, Ka Ho Reservoir Hillside, 22.13328N 113.57437E, ca 85 m, 9IV2019, MAC\_S09\_LLSA\_Sp.6, F. Brassard leg., Leaf litter extraction (standardized area), IBBL
- 1 queen; Macao, Coloane Island, Ka Ho Reservoir Hillside, 22.13328N 113.57437E, ca 85 m, 9IV2019, MAC\_S09\_LLSA\_Sp.6, F. Brassard leg., Leaf litter extraction (standardized area), IBBL
- 2 workers; Macao, Coloane Island, Hillside Department of Green Areas and Gardens, 22.12747N 113.56118E, ca 69 m, 20V2019, MAC\_S16\_LLSA\_Sp.11, F. Brassard leg., Leaf litter extraction (standardized area), IBBL
- 3 workers; Macao, Coloane Island, Coloane Trail near C13, 22.12144N 113.56485E, ca 107 m, 18III2019, MAC\_S01\_LLSP\_sp.6, F. Brassard leg., Leaf litter extraction (species pool), IBBL
- 2 workers; Macao, Coloane Island, Hac Sa Reservoir near C21, 22.12659N 113.57272E, ca 69 m, 19III2019, MAC\_S03\_LLSP\_Sp.4, F. Brassard leg., Leaf litter extraction (species pool), IBBL
- 2 workers; Macao, Coloane Island, Hama Temple Estatua da Deusa A-ma, 22.1237N 113.5636E, ca 161 m, 8IV2019, MAC\_S07\_LLSP\_Sp.6, F. Brassard leg., Leaf litter extraction (species pool), IBBL
- 1 worker; Macao, Coloane Island, Ka Ho Reservoir Freshwater Wetland, 22.13478N 113.57333E, ca 54 m, 9IV2019, MAC\_S08\_LLSP\_Sp.3, F. Brassard leg., Leaf litter extraction (species pool), IBBL
- 1 worker; Macao, Coloane Island, Ka Ho Reservoir Hillside, 22.13328N 113.57437E, ca 85 m, 9IV2019, MAC\_S09\_LLSP\_Sp.2, F. Brassard leg., Leaf litter extraction (species pool), IBBL
- 1 worker; Macao, Coloane Island, Ka Ho Lighthouse 2, 22.12923N 113.59092E, ca 34 m, 21V2019, MAC\_S17\_LLSP\_Sp.2, F. Brassard leg., Leaf litter extraction (species pool), IBBL
- 1 queen; Macao, Coloane Island, Ka Ho Lighthouse 2, 22.12923N 113.59092E, ca 34 m, 21V2019, MAC\_S17\_LLSP\_Sp.2, F. Brassard leg., Leaf litter extraction (species pool), IBBL
- 2 workers; Macao, Coloane Island, Oscar Farm hillside, 22.1131N 113.5557E, ca 83 m, 24VI2019, MAC\_S18\_LLSP\_Sp.7, F. Brassard leg., Leaf litter extraction (species pool), IBBL
- 2 workers; Macao, Coloane Island, Caesar Golf Center, 22.13505N 113.56115E, ca 7 m, 25VI2019, MAC\_S19\_LLSP\_Sp.2, F. Brassard leg., Leaf litter extraction (species pool), IBBL
- 1 worker; Macao, Coloane Island, Cotai Ecological Zone II, 22.1418N 113.5519E, ca 2 m, 26VI2019, MAC\_S20\_LLSP\_Sp.3, F. Brassard leg., Leaf litter extraction (species pool), IBBL
- 1 worker; Macao, Coloane Island, Coloane Trail near C3, 22.1217N 113.556E, ca 105 m, 27VI2019, MAC\_S21\_LLSP\_Sp.6, F. Brassard leg., Leaf litter extraction (species pool), IBBL
- 2 workers; Macao, Coloane Island, Ka Ho Lighthouse 2, 22.12923N 113.59092E, ca 34 m, 21V2019-6VI2019, MAC\_S17\_12.5\_q4\_Sp.1, F. Brassard leg., Subterranean trap, IBBL
- 2 workers; Macao, Coloane Island, Oscar Farm hillside, 22.1131N 113.5557E, ca 83 m, 24VI2019-8VII2019, MAC\_S18\_q2\_25\_Sp.2, F. Brassard leg., Subterranean trap, IBBL
- 2 workers; Macao, Coloane Island, Oscar Farm hillside, 22.1131N 113.5557E, ca 83 m, 24VI2019-8VII2019, MAC\_S18\_q2\_37.5\_Sp.1, F. Brassard leg., Subterranean trap, IBBL
- 1 worker; Macao, Guia Hill, 5VIII2015, CM. Leong leg.
- 2 workers; Macao, Ecological Protection Area I & II, 12I2017, CM. Leong leg.
- 1 dealate queen; Macao, Ecological Protection Area I & II, 12I2017, CM. Leong leg.

- 1 worker; Macao, Hac Sa Reservoir, 2VIII2017, B. Guénard leg.

***Tapinoma melanocephalum* Fabricius, 1793**

**Material examined.** MACAO SAR, CHINA  
 • 1 worker; Macao, Ka Ho Reservoir, 14VII2016, CM. Leong leg. • 1 worker; Macao, Guia Hill, 20VIII2016, CM. Leong leg. • 1 worker; Macao, Hac Sa Reservoir, 20VIII2016, CM. Leong leg. • 1 worker; Macao, Siu Tam Hill, 26VIII2016, CM. Leong leg. • 1 worker; Macao, Guia Hill, 27VIII2016, CM. Leong leg.

***Tapinoma* sp. 1 FB**

**Material examined.** MACAO SAR, CHINA • 2 workers; Macao, Coloane Island, Coloane Trail near 1-01-15, 22.11507N 113.56448E, ca 83 m, 29VIII2019, MAC\_S11\_T4\_1m\_Sp.2, F. Brassard leg., Arboreal bait, IBBL

***Technomyrmex brunneus* Forel, 1895**

**Material examined.** MACAO SAR, CHINA • 1 worker; Macao, Coloane Island, 22.1225N 113.5579E, ca 96 m, 9X2019, FB19281, F. Brassard leg., Hand collection, IBBL • 1 worker; Macao, Guia Hill, 13VII2015, CM. Leong leg. • 1 worker; Macao, Gui Hill, 15VII2016, CM. Leong leg. • 1 worker; Macao, Guia Hill, 27VIII2016, CM. Leong leg.

***Technomyrmex horni* Forel, 1912**

**Material examined.** MACAO SAR, CHINA

- 2 workers; Macao, Coloane Island, Ka Ho Height Family Trail Peak near 1-09-03, 22.12835N 113.57018E, ca 140 m, 4VI2019-12IX2019, MAC\_S14\_GN4\_H2\_n1, F. Brassard leg., Ground nest, IBBL
- 2 workers; Macao, Coloane Island, Coloane Trail near C3, 22.1217N 113.556E, ca 105 m, 10VII2019-8X2019, MAC\_S21\_GN4\_H3\_n1, F. Brassard leg., Ground nest, IBBL
- 2 workers; Macao, Coloane Island, Ka Ho Lighthouse 1, 22.12936N 113.59137E, ca 26 m, 20III2019, MAC\_S04\_LLSA\_Sp.6, F. Brassard leg., Leaf litter extraction (standardized area), IBBL
- 2 workers; Macao, Coloane Island, Ka Ho Height Family Trail Peak near 1-09-03, 22.12835N 113.57018E, ca 140 m, 16V2019, MAC\_S14\_LLSA\_Sp.4, F. Brassard leg., Leaf litter extraction (standardized area), IBBL
- 2 workers; Macao, Coloane Island, Coloane Trail near C3, 22.1217N 113.556E, ca 105 m, 27VI2019, MAC\_S21\_LLSA\_Sp.9, F. Brassard leg., Leaf litter extraction (standardized area), IBBL
- 3 workers; Macao, Coloane Island, Coloane Trail near C13, 22.12144N 113.56485E, ca 107 m, 18III2019, MAC\_S01\_LLSP\_sp.2, F. Brassard leg., Leaf litter extraction (species pool), IBBL
- 2 workers; Macao, Coloane Island, Coloane Trail near C3, 22.1217N 113.556E, ca 105 m, 27VI2019, MAC\_S21\_LLSP\_Sp.8, F. Brassard leg., Leaf litter extraction (species pool), IBBL

**DORYLINAE**

***Ooceraea biroi* Forel, 1907**

**Material examined.** MACAO SAR, CHINA



- 1 worker; Macao, Coloane Island, Coloane Trail near 1-01-10, 22.11652N 113.55888E, ca 102 m, 10IV2019, MAC\_S10\_LLSA\_Sp.1, F. Brassard leg., Leaf litter extraction (standardized area), IBBL
- 1 worker; Macao, Coloane Island, Ka Ho Lighthouse 2, 22.12923N 113.59092E, ca 34 m, 21V2019, MAC\_S17\_LLSA\_Sp.9, F. Brassard leg., Leaf litter extraction (standardized area), IBBL
- 1 worker; Macao, Coloane Island, Wetland Alto de Coloane, 22.123N 113.55966E, ca 93 m, 19III2019, MAC\_S02\_LLSP\_Sp.4, F. Brassard leg., Leaf litter extraction (species pool), IBBL
- 2 workers; Macao, Coloane Island, Coloane North East Hiking Trail, 22.1351N 113.57E, ca 78 m, 14V2019-4VI2019, MAC\_S12\_12.5\_q1\_Sp.2, F. Brassard leg., Subterranean trap, IBBL
- 1 worker; Macao, Coloane Island, Morro de Hac Sa Family Trail near 1-07-08, 22.1144N 113.56988E, ca 53 m, 17V2019-5VI2019, MAC\_S15\_25\_q2\_Sp.2, F. Brassard leg., Subterranean trap, IBBL
- 2 workers; Macao, Coloane Island, Morro de Hac Sa Family Trail near 1-07-08, 22.1144N 113.56988E, ca 53 m, 17V2019-5VI2019, MAC\_S15\_12.5\_q4\_Sp.2, F. Brassard leg., Subterranean trap, IBBL
- 2 workers; Macao, Coloane Island, Ka Ho Lighthouse 2, 22.12923N 113.59092E, ca 34 m, 21V2019-6VI2019, MAC\_S17\_12.5\_q4\_Sp.3, F. Brassard leg., Subterranean trap, IBBL
- 2 workers; Macao, Coloane Island, Oscar Farm hillside, 22.1131N 113.5557E, ca 83 m, 24VI2019-8VII2019, MAC\_S18\_25\_q1\_Sp.1, F. Brassard leg., Subterranean trap, IBBL
- 2 workers; Macao, Coloane Island, Cotai Ecological Zone II, 22.1418N 113.5519E, ca 2 m, 26VI2019-11VII2019, MAC\_S20\_q2\_12.5\_01\_Sp.1, F. Brassard leg., Subterranean trap, IBBL
- 2 workers; Macao, Coloane Island, Coloane Trail near C3, 22.1217N 113.556E, ca 105 m, 27VI2019-10VII2019, MAC\_S21\_q1\_25\_Sp.2, F. Brassard leg., Subterranean trap, IBBL • 1 worker; Macao, Tai Tam Hill, 25VIII2016, MG. Oxalá leg.

## FORMICINAE

### *Acropyga acutiventris* Roger, 1962

**Material examined.** MACAO SAR, CHINA • 1 dealate queen; Macao, Guia Hill, 24VII2015, CM. Leong leg. • 1 dealate queen; Macao, Siu Tam Hill, 26VIII2016, CM. Leong leg. • 7 workers; Macao, Hac Sa Reservoir, 29VII2017 CM. Leong leg. • 1 dealate queen; Macao, Hac Sa Reservoir, 29VII2017 CM. Leong leg. • 7 workers; Macao, Hac Sa Reservoir, 2VIII2017 B. Guénard leg. • 4 dealate queens; Macao, Hac Sa Reservoir, 2VIII2017 B. Guénard leg.

### *Acropyga* sp. mo02

**Material examined.** MACAO SAR, CHINA • 1 dealate queen; Macao, CM. Leong leg.

### *Anoplolepis gracilipes* Smith, 1857

**Material examined.** MACAO SAR, CHINA

- 2 workers; Macao, Coloane Island, Hac Sa Reservoir Family Trail near 1-05-12, 22.1237N 113.5684E, ca 91 m, 8IV2019, MAC\_S06\_LLSA\_Sp.8, F. Brassard leg., Leaf litter extraction (standardized area), IBBL

- 2 workers; Macao, Coloane Island, Ka Ho Height Family Trail Peak near 1-09-03, 22.12835N 113.57018E, ca 140 m, 16V2019, MAC\_S14\_LLSA\_Sp.14, F. Brassard leg., Leaf litter extraction (standardized area), IBBL
- 1 worker; Macao, Coloane Island, Oscar Farm hillside, 22.1131N 113.5557E, ca 83 m, 24VI2019, MAC\_S18\_LLSA\_Sp.8, F. Brassard leg., Leaf litter extraction (standardized area), IBBL
- 1 worker; Macao, Coloane Island, Hamma Temple Estatua da Deusa A-ma, 22.1237N 113.5636E, ca 161 m, 8IV2019, MAC\_S07\_LLSP\_Sp.2, F. Brassard leg., Leaf litter extraction (species pool), IBBL
- 2 workers; Macao, Coloane Island, Coloane Trail near 1-01-10, 22.11652N 113.55888E, ca 102 m, 10IV2019, MAC\_S10\_LLSP\_Sp.1, F. Brassard leg., Leaf litter extraction (species pool), IBBL
- 2 workers; Macao, Coloane Island, Ka Ho Height Family Trail Peak near 1-09-03, 22.12835N 113.57018E, ca 140 m, 16V2019, MAC\_S14\_LLSP\_Sp.17, F. Brassard leg., Leaf litter extraction (species pool), IBBL • 1 worker; Macao, Hac Sa Reservoir, 7VIII2015, CM. Leong leg. • 1 worker; Macao, Ka Ho Reservoir, 14VII2016, CM. Leong leg. • 1 worker; Macao, Hac Sa Reservoir, 20VIII2016, CM. Leong leg.

***Brachymyrmex patagonicus* Mayr, 1868**

**Material examined.** MACAO SAR, CHINA • 2 workers; Macao, Coloane Island, Mangrove, 22.1418N 113.5519E, ca 0 m, 26VI2019, FB19202, F. Brassard leg., Hand collection, IBBL

***Camponotus carin* Emery, 1889**

**Material examined.** MACAO SAR, CHINA • 1 worker; Macao, Coloane Island, Hac Sa Reservoir, 20VIII2016, CM. Leong leg., Hand collection, IBBL

***Camponotus* nr. *irritans* Smith, 1857** MACAO SAR, CHINA • 7 workers; Macao, Coloane Island, Cotai Ecological Zone II, 22.1418N 113.5519E, ca 2 m, 11VII2019, MAC\_S20\_B08, F. Brassard leg.

***Camponotus lighti* Wheeler, 1927**

**Material examined.** MACAO SAR, CHINA • 1 worker; Macao, Tai Tam Hill, 29VII2015, CM. Leong leg. • 1 worker; Macao, Tam Kong Temple, 30VII2015, CM. Leong leg. • 1 worker; Macao, Tam Kong Temple, 31VII2015, CM. Leong leg. • 1 worker; Macao, Penha Hill, 6VIII2015, CM. Leong leg. • 1 worker; Macao, Guia Hill, 9VIII2015, CM. Leong leg.

***Camponotus mitis* Smith, 1858**

**Material examined.** MACAO SAR, CHINA

- 2 workers; Macao, Coloane Island, Coloane Trail near 1-01-15, 22.11507N 113.56448E, ca 83 m, 29VIII2019, MAC\_S11\_T3\_2m\_Sp.1, F. Brassard leg., Arboreal bait, IBBL
- 2 workers; Macao, Coloane Island, Ka Ho Lighthouse 2, 22.12923N 113.59092E, ca 34 m, 24IX2019, MAC\_S17\_T2\_1m\_Sp.1, F. Brassard leg., Arboreal bait, IBBL

- 1 worker; Macao, Coloane Island, Cotai Ecological Zone II, 22.1418N 113.5519E, ca 2 m, 9X2019, MAC\_S20\_T3\_1m\_Sp.2, F. Brassard leg., Arboreal bait, IBBL
- 1 worker; Macao, Coloane Island, Cotai Ecological Zone II, 22.1418N 113.5519E, ca 2 m, 9X2019, MAC\_S20\_T3\_5m\_Sp.1, F. Brassard leg., Arboreal bait, IBBL
- 2 workers; Macao, Coloane Island, Hamma Temple Estatua da Deusa A-ma, 22.1237N 113.5636E, ca 161 m, 8IV2019, MAC\_S07\_LLSA\_Sp.1, F. Brassard leg., Leaf litter extraction (standardized area), IBBL
- 2 workers; Macao, Coloane Island, Coloane Trail near 1-01-15, 22.11507N 113.56448E, ca 83 m, 11IV2019, MAC\_S11\_LLSP\_Sp.12, F. Brassard leg., Leaf litter extraction (species pool), IBBL
- 2 workers; Macao, Siu Tam Hill, 18VII2015, CM. Leong leg.
- 1 worker; Macao, Hac Sa Reservoir, 31VII2015, CM. Leong leg.
- 2 workers; Macao, Hac Sa Reservoir, 7VIII2015, CM. Leong leg.
- 1 dealate queen; Macao, Hac Sa Reservoir, 20VIII, CM. Leong leg.
- 3 workers; Macao, Siu Tam Hill, 26VIII2016, CM. Leong leg.
- 3 workers; Macao, Hac Sa Reservoir, 9I2017, CM. Leong leg.

***Camponotus nicobarensis* Mayr, 1865**

**Material examined.** MACAO SAR, CHINA

- 3 workers; Macao, Coloane Island, Wetland Alto de Coloane, 22.123N 113.55966E, ca 93 m, 19III2019, MAC\_S02\_LLSA\_Sp.1, F. Brassard leg., Leaf litter extraction (standardized area), IBBL
- 1 queen; Macao, Coloane Island, Wetland Alto de Coloane, 22.123N 113.55966E, ca 93 m, 19III2019, MAC\_S02\_LLSA\_Sp.1, F. Brassard leg., Leaf litter extraction (standardized area), IBBL
- 1 worker; Macao, Coloane Island, Hac Sa Reservoir near C21, 22.12659N 113.57272E, ca 69 m, 19III2019, MAC\_S03\_LLSA\_Sp.6, F. Brassard leg., Leaf litter extraction (standardized area), IBBL
- 1 queen; Macao, Coloane Island, Hac Sa Reservoir near C21, 22.12659N 113.57272E, ca 69 m, 19III2019, MAC\_S03\_LLSA\_Sp.6, F. Brassard leg., Leaf litter extraction (standardized area), IBBL
- 1 queen; Macao, Coloane Island, Ka Ho Height Family Trail Peak near 1-09-03, 22.12835N 113.57018E, ca 140 m, 16V2019, MAC\_S14\_LLSA\_Sp.16, F. Brassard leg., Leaf litter extraction (standardized area), IBBL
- 1 worker; Macao, Coloane Island, Coloane Trail near C3, 22.1217N 113.556E, ca 105 m, 27VI2019, MAC\_S21\_LLSA\_Sp.10, F. Brassard leg., Leaf litter extraction (standardized area), IBBL
- 1 worker; Macao, Coloane Island, Coloane Trail near C3, 22.1217N 113.556E, ca 105 m, 27VI2019, MAC\_S21\_LLSP\_Sp.1, F. Brassard leg., Leaf litter extraction (species pool), IBBL
- 2 workers; Macao, Hac Sa Reservoir, 7VIII2015, CM. Leong leg.
- 1 worker; Macao, Tai Tam Hill, 30IX2015, CY. Lei leg.
- 1 worker; Macao, Ka Ho Reservoir, 14VII2016, CM. Leong leg.
- 1 worker; Macao, Guia Hill, 20VIII2016, CM. Leong leg.
- 1 worker; Macao, Hac Sa Reservoir, 9I2017, CM. Leong leg.

***Camponotus parius* Emery, 1889**

**Material examined.** MACAO SAR, CHINA • 1 worker; Macao, Ka Ho Reservoir, 14VII2016, CM. Leong leg. • 2 workers; Macao, Hac Sa Reservoir, 2VIII2017, CM. Leong leg.

***Camponotus variegatus dulcis* Dalla Torre, 1893**

**Material examined.** MACAO SAR, CHINA • 1 worker; Macao, Guia Hill, 22.1983 N 113.5511 E, 20VIII2016, CM. Leong leg.

***Camponotus vitiosus* Smith, 1874**

**Material examined.** MACAO SAR, CHINA

- 1 worker; Macao, Coloane Island, Ka Ho Height Family Trail Peak near 1-09-03, 22.12835N 113.57018E, ca 140 m, 12IX2019, MAC\_S14\_T1\_3m\_Sp.1, F. Brassard leg., Arboreal bait, IBBL
- 2 workers; Macao, Coloane Island, Ka Ho Lighthouse 2, 22.12923N 113.59092E, ca 34 m, 24IX2019, MAC\_S17\_T4\_1m\_Sp.1, F. Brassard leg., Arboreal bait, IBBL
- 1 worker; Macao, Coloane Island, Cotai Ecological Zone II, 22.1418N 113.5519E, ca 2 m, 9X2019, MAC\_S20\_T4\_2m\_Sp.1, F. Brassard leg., Arboreal bait, IBBL • 3 workers; Macao, Siu Tam Hill, 13VII2016, MG. Oxalá leg. • 1 worker; Macao, Guia Hill, 20VIII2016, CM. Leong leg.

***Camponotus* sp.1 FB**

**Material examined.** MACAO SAR, CHINA • 2 workers; Macao, Coloane Island, Seaside Cliffs, 22.12923N 113.59092E, ca 30 m, 6VI2019, FB19182, F. Brassard leg., Hand collection, IBBL

***Colobopsis* nr. *nipponica* Wheeler, 1928**

**Material examined.** MACAO SAR, CHINA • 1 worker; Macao, Tai Tam Hill, 5VIII2015, CM. Leong leg.

***Colobopsis* nr. *vitrea* Smith, 1860**

**Material examined.** MACAO SAR, CHINA • 1 worker; Macao, Coloane Island, Ka Ho Height Family Trail Peak near 1-09-03, 22.12835N 113.57018E, ca 140 m, 12IX2019, FB19268, F. Brassard leg., Hand collection, IBBL • 1 worker; Macao, Siu Tam Hill, 5VIII2015, CM. Leong leg.

***Gesomyrmex howardi* Wheeler, 1921**

**Material examined.** MACAO SAR, CHINA • 2 workers; Macao, Coloane Island, 22.1247N 113.565E, 22VIII2020, CML leg., Hand collection, IBBL • 1 queen; Macao, Coloane Island, 22.1146N 113.5579E, 8VIII2020, CML leg., Hand collection, IBBL

***Lepisiota rothneyi* Forel, 1894**

**Material examined.** MACAO SAR, CHINA • 2 workers; Macao, Coloane Island, Hac Sa Reservoir Family Trail near 1-05-12, 22.1237N 113.5684E, ca 91 m, 23IV2019, MAC\_S06\_B08\_Sp.1, F. Brassard leg., Ground bait, IBBL

***Nylanderia amia* Forel, 1913**

**Material examined.** MACAO SAR, CHINA • 1 worker; Macao, Ka Ho Reservoir, 14VII2016, CM. Leong leg. • 1 worker; Macao, Guia Hill, 20VIII2016, CM. Leong leg. • 1 worker; Macao, Hac Sa Reservoir, 2VIII2017, B. Guénard leg.

***Nylanderia bourbonica* Forel, 1886**

**Material examined.** MACAO SAR, CHINA

- 2 workers; Macao, Coloane Island, Cotai Ecological Zone II, 22.1418N 113.5519E, ca 2 m, 11VII2019, MAC\_S20\_B01\_Sp.1, F. Brassard leg., Ground bait, IBBL
- 2 workers; Macao, Coloane Island, Cotai Ecological Zone II, 22.1418N 113.5519E, ca 2 m, 11VII2019, MAC\_S20\_B02\_Sp.1, F. Brassard leg., Ground bait, IBBL
- 2 workers; Macao, Coloane Island, Cotai Ecological Zone II, 22.1418N 113.5519E, ca 2 m, 11VII2019, MAC\_S20\_B03\_Sp.1, F. Brassard leg., Ground bait, IBBL
- 2 workers; Macao, Coloane Island, Cotai Ecological Zone II, 22.1418N 113.5519E, ca 2 m, 11VII2019, MAC\_S20\_B04\_Sp.1, F. Brassard leg., Ground bait, IBBL
- 2 workers; Macao, Coloane Island, Cotai Ecological Zone II, 22.1418N 113.5519E, ca 2 m, 11VII2019, MAC\_S20\_B05\_Sp.1, F. Brassard leg., Ground bait, IBBL
- 2 workers; Macao, Coloane Island, Cotai Ecological Zone II, 22.1418N 113.5519E, ca 2 m, 11VII2019, MAC\_S20\_B07\_Sp.2, F. Brassard leg., Ground bait, IBBL
- 2 workers; Macao, Coloane Island, Cotai Ecological Zone II, 22.1418N 113.5519E, ca 2 m, 11VII2019, MAC\_S20\_B08\_Sp.2, F. Brassard leg., Ground bait, IBBL
- 2 workers; Macao, Coloane Island, Cotai Ecological Zone II, 22.1418N 113.5519E, ca 2 m, 11VII2019, MAC\_S20\_B09\_Sp.1, F. Brassard leg., Ground bait, IBBL
- 2 workers; Macao, Coloane Island, Cotai Ecological Zone II, 22.1418N 113.5519E, ca 2 m, 11VII2019, MAC\_S20\_B11\_Sp.1, F. Brassard leg., Ground bait, IBBL
- 2 workers; Macao, Coloane Island, Cotai Ecological Zone II, 22.1418N 113.5519E, ca 2 m, 26VI2019, MAC\_S20\_LLSA\_Sp.2, F. Brassard leg., Leaf litter extraction (standardized area), IBBL
- 2 workers; Macao, Coloane Island, Cotai Ecological Zone II, 22.1418N 113.5519E, ca 2 m, 26VI2019, MAC\_S20\_LLSP\_Sp.4, F. Brassard leg., Leaf litter extraction (species pool), IBBL

***Nylanderia indica* Forel, 1894**

**Material examined.** MACAO SAR, CHINA

- 1 worker; Macao, Coloane Island, Ka Ho Reservoir Freshwater Wetland, 22.13478N 113.57333E, ca 54 m, 9IV2019, MAC\_S08\_LLSA\_Sp.1, F. Brassard leg., Leaf litter extraction (standardized area), IBBL
- 2 workers; Macao, Coloane Island, Ka Ho Reservoir Hillside, 22.13328N 113.57437E, ca 85 m, 9IV2019, MAC\_S09\_LLSA\_Sp.7, F. Brassard leg., Leaf litter extraction (standardized area), IBBL
- 1 worker; Macao, Coloane Island, Coloane North East Hiking Trail, 22.1351N 113.57E, ca 78 m, 14V2019, MAC\_S12\_LLSA\_Sp.5, F. Brassard leg., Leaf litter extraction (standardized area), IBBL
- 1 worker; Macao, Coloane Island, Coloane North East Hiking Trail, 22.1351N 113.57E, ca 78 m, 14V2019, MAC\_S12\_LLSA\_Sp.10, F. Brassard leg., Leaf litter extraction (standardized area), IBBL
- 2 workers; Macao, Coloane Island, Morro de Hac Sa Family Trail near 1-07-08, 22.1144N 113.56988E, ca 53 m, 17V2019, MAC\_S15\_LLSA\_Sp.2, F. Brassard leg., Leaf litter extraction (standardized area), IBBL
- 3 workers; Macao, Coloane Island, Coloane Trail near C13, 22.12144N 113.56485E, ca 107 m, 18III2019, MAC\_S01\_LLSP\_sp.1, F. Brassard leg., Leaf litter extraction (species pool), IBBL

- 2 workers; Macao, Coloane Island, Hac Sa Reservoir near C21, 22.12659N 113.57272E, ca 69 m, 19III2019, MAC\_S03\_LLSP\_Sp.6, F. Brassard leg., Leaf litter extraction (species pool), IBBL
- 1 worker; Macao, Coloane Island, Hac Sa Reservoir Family Trail near 1-05-12, 22.1237N 113.5684E, ca 91 m, 8IV2019, MAC\_S06\_LLSP\_Sp.1, F. Brassard leg., Leaf litter extraction (species pool), IBBL
- 1 worker; Macao, Coloane Island, Coloane North East Hiking Trail, 22.1351N 113.57E, ca 78 m, 14V2019, MAC\_S12\_LLSP\_Sp.4, F. Brassard leg., Leaf litter extraction (species pool), IBBL
- 2 workers; Macao, Coloane Island, Caesar Golf Center, 22.13505N 113.56115E, ca 7 m, 25VI2019, MAC\_S19\_LLSP\_Sp.6, F. Brassard leg., Leaf litter extraction (species pool), IBBL

***Nylanderia sharpii* Forel, 1899**

**Material examined. MACAO SAR, CHINA**

- 2 workers; Macao, Coloane Island, Coloane Trail near 1-01-15, 22.11507N 113.56448E, ca 83 m, 29VIII2019, MAC\_S11\_T2\_1m\_Sp.2, F. Brassard leg., Arboreal bait, IBBL
- 2 workers; Macao, Coloane Island, Cotai Ecological Zone II, 22.1418N 113.5519E, ca 2 m, 9X2019, MAC\_S20\_T2\_1m\_Sp.2, F. Brassard leg., Arboreal bait, IBBL
- 2 workers; Macao, Coloane Island, Cotai Ecological Zone II, 22.1418N 113.5519E, ca 2 m, 9X2019, MAC\_S20\_T3\_1m\_Sp.1, F. Brassard leg., Arboreal bait, IBBL
- 1 worker; Macao, Coloane Island, Coloane Trail near 1-01-15, 22.11507N 113.56448E, ca 83 m, 25IV2019, MAC\_S11\_B04\_Sp.1, F. Brassard leg., Ground bait, IBBL
- 1 worker; Macao, Coloane Island, Coloane North East Hiking Trail, 22.1351N 113.57E, ca 78 m, 4VI2019, MAC\_S12\_B02\_Sp.2, F. Brassard leg., Ground bait, IBBL
- 2 workers; Macao, Coloane Island, Morro de Hac Sa Family Trail near 1-07-08, 22.1144N 113.56988E, ca 53 m, 5VI2019, MAC\_S15\_B01\_Sp.4, F. Brassard leg., Ground bait, IBBL
- 2 workers; Macao, Coloane Island, Morro de Hac Sa Family Trail near 1-07-08, 22.1144N 113.56988E, ca 53 m, 5VI2019, MAC\_S15\_B04\_Sp.1, F. Brassard leg., Ground bait, IBBL
- 2 workers; Macao, Coloane Island, Morro de Hac Sa Family Trail near 1-07-08, 22.1144N 113.56988E, ca 53 m, 5VI2019, MAC\_S15\_B09\_Sp.1, F. Brassard leg., Ground bait, IBBL
- 2 workers; Macao, Coloane Island, Morro de Hac Sa Family Trail near 1-07-08, 22.1144N 113.56988E, ca 53 m, 5VI2019, MAC\_S15\_B10\_Sp.1, F. Brassard leg., Ground bait, IBBL
- 2 workers; Macao, Coloane Island, Coloane Trail near C3, 22.1217N 113.556E, ca 105 m, 11VII2019, MAC\_S21\_B07\_Sp.4, F. Brassard leg., Ground bait, IBBL
- 2 workers; Macao, Coloane Island, Coloane Trail near C3, 22.1217N 113.556E, ca 105 m, 11VII2019, MAC\_S21\_B10\_Sp.3, F. Brassard leg., Ground bait, IBBL
- 1 worker; Macao, Coloane Island, Coloane Trail near 1-01-15, 22.11507N 113.56448E, ca 83 m, 25IV2019-29VIII2019, MAC\_S11\_GN7\_H3\_n1, F. Brassard leg., Ground nest, IBBL
- 1 male; Macao, Coloane Island, Coloane Trail near 1-01-15, 22.11507N 113.56448E, ca 83 m, 25IV2019-29VIII2019, MAC\_S11\_GN7\_H3\_n1, F. Brassard leg., Ground nest, IBBL
- 1 worker; Macao, Coloane Island, Morro de Hac Sa Family Trail near 1-07-08, 22.1144N 113.56988E, ca 53 m, 5VI2019-11IX2019, MAC\_S15\_GN7\_H4\_n1, F. Brassard leg., Ground nest, IBBL
- 1 queen; Macao, Coloane Island, Morro de Hac Sa Family Trail near 1-07-08, 22.1144N 113.56988E, ca 53 m, 5VI2019-11IX2019, MAC\_S15\_GN7\_H4\_n1, F. Brassard leg., Ground nest, IBBL
- 1 worker; Macao, Coloane Island, Caesar Golf Center, 22.13505N 113.56115E, ca 7 m, 25VI2019, MAC\_S19\_LLSA\_Sp.5, F. Brassard leg., Leaf litter extraction (standardized area), IBBL
- 1 queen; Macao, Coloane Island, Caesar Golf Center, 22.13505N 113.56115E, ca 7 m, 25VI2019, MAC\_S19\_LLSA\_Sp.5, F. Brassard leg., Leaf litter extraction (standardized area), IBBL

- 1 worker; Macao, Coloane Island, Caesar Golf Center, 22.13505N 113.56115E, ca 7 m, 25VI2019-10VII2019, MAC\_S19\_q4\_GL\_04\_Sp.2, F. Brassard leg., Subterranean trap, IBBL

***Nylanderia taylori* Forel, 1894**

**Material examined.** MACAO SAR, CHINA

- 2 workers; Macao, Coloane Island, Coloane Trail near C3, 22.1217N 113.556E, ca 105 m, 10VII2019-8X2019, MAC\_S21\_GN1\_H4\_n1, F. Brassard leg., Ground nest, IBBL
- 1 worker; Macao, Coloane Island, Coloane Trail near 1-01-15, 22.11507N 113.56448E, ca 83 m, 11IV2019, MAC\_S11\_LLSP\_Sp.10, F. Brassard leg., Leaf litter extraction (species pool), IBBL

***Nylanderia vividula* Nylander, 1846**

**Material examined.** MACAO SAR, CHINA • 1 worker; Macao, Hac Sa Reservoir, 20VIII2016, CM. Leong leg. • 1 worker; Macao, Siu Tam Hill, 26VIII2016, CM. Leong leg.

***Nylanderia yerburyi* Forel, 1894**

**Material examined.** MACAO SAR, CHINA • 1 worker; Macao, Guia Hill, 15VII2015, CM. Leong leg.

***Nylanderia* sp. 3 BG**

**Material examined.** MACAO SAR, CHINA • • 2 worker; Macao, Coloane Island, Morro\_de\_Hac\_Sa\_Family\_Trail\_nr\_1-07-08, 22.1144N 113.56988E, ca 53 m, 5VI2019, MAC\_S15\_B02\_Sp.5, F. Brassard leg., Ground\_Bait, IBBL • 2 worker; Macao, Coloane Island, Morro\_de\_Hac\_Sa\_Family\_Trail\_nr\_1-07-08, 22.1144N 113.56988E, ca 53 m, 5VI2019, MAC\_S15\_B03\_Sp.3, F. Brassard leg., Ground\_Bait, IBBL • 2 worker; Macao, Coloane Island, Morro\_de\_Hac\_Sa\_Family\_Trail\_nr\_1-07-08, 22.1144N 113.56988E, ca 53 m, 5VI2019-11IX2019, MAC\_S15\_GN8\_H4\_n1, F. Brassard leg., Ground\_Nest, IBBL

***Nylanderia* sp. 6 BG**

**Material examined.** MACAO SAR, CHINA

- 2 workers; Macao, Coloane Island, Coloane Trail near 1-01-10, 22.11652N 113.55888E, ca 102 m, 10IV2019, MAC\_S10\_LLSP\_Sp.9, F. Brassard leg., Leaf litter extraction (species pool), IBBL
- 2 workers; Macao, Coloane Island, Morro de Hac Sa Family Trail near 1-07-08, 22.1144N 113.56988E, ca 53 m, 17V2019, MAC\_S15\_LLSP\_Sp.10, F. Brassard leg., Leaf litter extraction (species pool), IBBL

***Paraparatrechina* sp.1 BG Forel, 1913**

**Material examined.** MACAO SAR, CHINA

- 2 workers; Macao, Coloane Island, Morro de Hac Sa Family Trail near 1-07-08, 22.1144N 113.56988E, ca 53 m, 5VI2019, MAC\_S15\_B02\_Sp.3, F. Brassard leg., Ground bait, IBBL
- 1 worker; Macao, Coloane Island, Seoc Pai Van Park, 22.12492N 113.55663E, ca 35 m, 20III2019, MAC\_S05\_LLSP\_Sp.8, F. Brassard leg., Leaf litter extraction (species pool), IBBL
- 1 worker; Macao, Coloane Island, Coloane Trail near 1-01-15, 22.11507N 113.56448E, ca 83 m, 11IV2019, MAC\_S11\_LLSP\_Sp.5, F. Brassard leg., Leaf litter extraction (species pool), IBBL
- 1 worker; Macao, Coloane Island, Oscar Farm hillside, 22.1131N 113.5557E, ca 83 m, 24VI2019-8VII2019, MAC\_S18\_q2\_37.5\_Sp.2, F. Brassard leg., Subterranean trap, IBBL

***Paratrechina longicornis* Latreille, 1802**

**Material examined.** MACAO SAR, CHINA

- 2 workers; Macao, Coloane Island, Coloane North East Hiking Trail, 22.1351N 113.57E, ca 78 m, 14V2019, MAC\_S12\_LLSA\_Sp.6, F. Brassard leg., Leaf litter extraction (standardized area), IBBL
- 1 worker; Macao, Coloane Island, Hillside Department of Green Areas and Gardens, 22.12747N 113.56118E, ca 69 m, 20V2019, MAC\_S16\_LLSA\_Sp.3, F. Brassard leg., Leaf litter extraction (standardized area), IBBL
- 1 queen; Macao, Coloane Island, Hillside Department of Green Areas and Gardens, 22.12747N 113.56118E, ca 69 m, 20V2019, MAC\_S16\_LLSA\_Sp.3, F. Brassard leg., Leaf litter extraction (standardized area), IBBL
- 2 workers; Macao, Coloane Island, Oscar Farm hillside, 22.1131N 113.5557E, ca 83 m, 24VI2019, MAC\_S18\_LLSA\_Sp.5, F. Brassard leg., Leaf litter extraction (standardized area), IBBL
- 1 worker; Macao, Coloane Island, Caesar Golf Center, 22.13505N 113.56115E, ca 7 m, 25VI2019, MAC\_S19\_LLSA\_Sp.6, F. Brassard leg., Leaf litter extraction (standardized area), IBBL
- 1 queen; Macao, Coloane Island, Caesar Golf Center, 22.13505N 113.56115E, ca 7 m, 25VI2019, MAC\_S19\_LLSA\_Sp.6, F. Brassard leg., Leaf litter extraction (standardized area), IBBL
- 1 male; Macao, Coloane Island, Caesar Golf Center, 22.13505N 113.56115E, ca 7 m, 25VI2019, MAC\_S19\_LLSA\_Sp.6, F. Brassard leg., Leaf litter extraction (standardized area), IBBL
- 2 workers; Macao, Coloane Island, Ka Ho Reservoir Hillside, 22.13328N 113.57437E, ca 85 m, 9IV2019, MAC\_S09\_LLSP\_Sp.9, F. Brassard leg., Leaf litter extraction (species pool), IBBL
- 2 workers; Macao, Coloane Island, Coloane Trail near 1-01-15, 22.11507N 113.56448E, ca 83 m, 11IV2019, MAC\_S11\_LLSP\_Sp.6, F. Brassard leg., Leaf litter extraction (species pool), IBBL
- 2 workers; Macao, Coloane Island, Hillside Department of Green Areas and Gardens, 22.12747N 113.56118E, ca 69 m, 20V2019, MAC\_S16\_LLSP\_Sp.2, F. Brassard leg., Leaf litter extraction (species pool), IBBL
- 1 worker; Macao, Coloane Island, Caesar Golf Center, 22.13505N 113.56115E, ca 7 m, 25VI2019, MAC\_S19\_LLSP\_Sp.1, F. Brassard leg., Leaf litter extraction (species pool), IBBL
- 1 queen; Macao, Coloane Island, Caesar Golf Center, 22.13505N 113.56115E, ca 7 m, 25VI2019, MAC\_S19\_LLSP\_Sp.1, F. Brassard leg., Leaf litter extraction (species pool), IBBL
- 1 worker; Macao, Hac Sa Reservoir, 29VII2015, CM. Leong leg.
- 1 worker; Macao, Tam Kong Temple, 30VII2015, CM. Leong leg.
- 2 workers; Macao, Penha Hill, 6VIII2015, CM. Leong leg.
- 2 workers; Macao, Ka Ho Reservoir, 14VII2016, CM. Leong leg.
- 1 worker; Macao, Hac Sa Reservoir, 20VIII2016, CM. Leong leg.
- 1 worker; Macao, Siu Tam Hill, 26VIII2016, CM. Leong leg.
- 1 worker; Macao, Hac Sa Reservoir, 9I2017, CM. Leong leg.
- 1 worker; Macao, Ecological Protection Area I & II, 12I2017, CM. Leong leg.



***Plagiolepis alluaudi* Emery, 1894**

**Material examined.** MACAO SAR, CHINA • 1 worker; Macao, Coloane Island, Ka Ho Height Family Trail Peak near 1-09-03, 22.12835N 113.57018E, ca 140 m, 12IX2019, MAC\_S14\_T2\_2m\_Sp.1, F. Brassard leg., Arboreal bait, IBBL

***Polyrhachis demangei* Santschi, 1910**

**Material examined.** MACAO SAR, CHINA • 1 worker; Macao, Ka Ho Reservoir, 23VIII2015, CM. Leong leg.

***Polyrhachis dives* Smith, 1857**

**Material examined.** MACAO SAR, CHINA • 1 worker; Macao, Coloane Island, Hac Sa Reservoir near C21, 22.12659N 113.57272E, ca 69 m, 19III2019, MAC\_S03\_HC\_01\_Sp.2, F. Brassard leg., Hand collection, IBBL  
• 1 worker; Macao, Hac Sa Reservoir, 22I2017, CM. Leong leg.

***Polyrhachis illaudata* Walker, 1859**

**Material examined.** MACAO SAR, CHINA

- 2 workers; Macao, Coloane Island, Hama Temple Estatua da Deusa A-ma, 22.1237N 113.5636E, ca 161 m, 8VIII2019, MAC\_S7\_T3\_3m\_sp.1, F. Brassard leg., Arboreal bait, IBBL
- 1 worker; Macao, Coloane Island, Morro de Hac Sa Family Trail near 1-07-08, 22.1144N 113.56988E, ca 53 m, 12IX2019, MAC\_S15\_T1\_4m\_Sp.2, F. Brassard leg., Arboreal bait, IBBL
- 3 workers; Macao, Coloane Island, Hac Sa Reservoir near C21, 22.12659N 113.57272E, ca 69 m, 19III2019, MAC\_S03\_HC\_01\_Sp.1, F. Brassard leg., Hand collection, IBBL
- 1 worker; Macao, Coloane Island, Morro de Hac Sa Family Trail near 1-07-08, 22.1144N 113.56988E, ca 53 m, 17V2019, MAC\_S15\_LLSP\_Sp.2, F. Brassard leg., Leaf litter extraction (species pool), IBBL • 1 worker; Macao, Ka Ho Reservoir, 11VII2015, CM. Leong leg. • 1 worker; Macao, Ka Ho Reservoir, 14VII2016, CM. Leong leg. • 1 worker; Macao, Hac Sa Reservoir, 20VIII2016, CM. Leong leg. • 1 worker; Macao, Tai Tam Hill, 2VIII2017, B. Guénard leg.

***Polyrhachis latona* Wheeler, 1909**

**Material examined.** MACAO SAR, CHINA • 1 worker; Macao, Coloane Island, Hac Sa Reservoir near C21, 22.12659N 113.57272E, ca 69 m, 19III2019, MAC\_S03\_LLSA\_Sp.5, F. Brassard leg., Leaf litter extraction (standardized area), IBBL

***Polyrhachis lucidula* Emery, 1893**

**Material examined.** MACAO SAR, CHINA • 2 workers; Macao, Coloane Island, Coastal\_Trail, 22.1144N 113.56988E, ca 112 m, 17V2019, FB19152, F. Brassard leg., Hand collection, IBBL

***Polyrhachis tyrannica* Smith, 1858**

MACAO SAR, CHINA • 2 workers, Macao, Coloane Island, Hac-Sa, 25VI1999, *Sk. Yamane* leg., SKYC (not examined).

## LEPTANILLINAE

### *Leptanilla macauensis* Leong, Yamane & Guénard, 2018

**Material examined.** MACAO SAR, CHINA • 5 workers; Macao, Ilha Verde Hill, 25I2017, CM. Leong leg.

## MYRMICINAE

### *Cardicondyla minutior* Forel, 1899

**Material examined.** MACAO SAR, CHINA

- 1 worker; Macao, Coloane Island, Ka Ho Reservoir Hillside, 22.13328N 113.57437E, ca 85 m, 24IV2019, MAC\_S09\_B11\_Sp.2, F. Brassard leg., Ground bait, IBBL
- 1 worker; Macao, Coloane Island, Ka Ho Lighthouse 1, 22.12936N 113.59137E, ca 26 m, 20III2019, MAC\_S04\_LLSP\_Sp.6, F. Brassard leg., Leaf litter extraction (species pool), IBBL • 2 workers; Macao, Tai Tam Hill, 2VIII2017, B. Guénard leg.

### *Cardiocondyla wroughtonii* Forel, 1890

**Material examined.** MACAO SAR, CHINA

- 1 worker; Macao, Coloane Island, Coloane Trail near 1-01-10, 22.11652N 113.55888E, ca 102 m, 29VIII2019, MAC\_S10\_T2\_1m\_Sp.3, F. Brassard leg., Arboreal bait, IBBL
- 1 worker; Macao, Coloane Island, Coloane Trail near 1-01-15, 22.11507N 113.56448E, ca 83 m, 29VIII2019, MAC\_S11\_T2\_5m, F. Brassard leg., Arboreal bait, IBBL
- 1 worker; Macao, Coloane Island, Coloane Trail near 1-01-15, 22.11507N 113.56448E, ca 83 m, 29VIII2019, MAC\_S11\_T3\_3m\_Sp.4, F. Brassard leg., Arboreal bait, IBBL

### *Carebara diversa laotina* Santschi, 1920

**Material examined.** MACAO SAR, CHINA • 50 workers; Macao, Tai Tam Hill, 2VIII2017, B. Guénard leg.

### *Carebara melasolena* Zhou & Zheng, 1997

**Material examined.** MACAO SAR, CHINA

- 1 worker; Macao, Coloane Island, Coloane Trail near 1-01-15, 22.11507N 113.56448E, ca 83 m, 11IV2019, MAC\_S11\_LLSA\_Sp.3, F. Brassard leg., Leaf litter extraction (standardized area), IBBL

- 1 worker; Macao, Coloane Island, Hillside Department of Green Areas and Gardens, 22.12747N 113.56118E, ca 69 m, 20V2019, MAC\_S16\_LLSA\_Sp.7, F. Brassard leg., Leaf litter extraction (standardized area), IBBL
- 2 workers; Macao, Coloane Island, Coloane Trail near 1-01-15, 22.11507N 113.56448E, ca 83 m, 11IV2019-25IV2019, MAC\_S11\_25\_q4\_Sp.1, F. Brassard leg., Subterranean trap, IBBL
- 2 workers; Macao, Coloane Island, Coloane North East Hiking Trail, 22.1351N 113.57E, ca 78 m, 14V2019-4VI2019, MAC\_S12\_50\_q1\_Sp.1, F. Brassard leg., Subterranean trap, IBBL • 3 workers; Macao, Guia Hill, 18VIII2016, CM. Leong leg. • 1 worker; Macao, Guia Hill, 27VIII2016, CM. Leong leg.

#### ***Carebara sangi* Eguchi & Bui, 2007**

##### **Material examined. MACAO SAR, CHINA**

- 1 worker; Macao, Coloane Island, Macau Golf & Country Club, 22.12481N 113.57902E, ca 19 m, 15V2019-6VI2019, MAC\_S13\_25\_q1\_Sp.2, F. Brassard leg., Subterranean trap, IBBL
- 1 worker; Macao, Coloane Island, Morro de Hac Sa Family Trail near 1-07-08, 22.1144N 113.56988E, ca 53 m, 17V2019-5VI2019, MAC\_S15\_25\_q2\_Sp.4, F. Brassard leg., Subterranean trap, IBBL
- 1 worker; Macao, Coloane Island, Morro de Hac Sa Family Trail near 1-07-08, 22.1144N 113.56988E, ca 53 m, 17V2019-5VI2019, MAC\_S15\_25\_q4\_Sp.2, F. Brassard leg., Subterranean trap, IBBL

#### ***Carebara zengchengensis* Zhou, Zhao & Jia, 2006**

##### **Material examined. MACAO SAR, CHINA**

- 1 worker; Macao, Coloane Island, Ka Ho Reservoir Freshwater Wetland, 22.13478N 113.57333E, ca 54 m, 24IV2019, MAC\_S08\_B09\_Sp.1, F. Brassard leg., Ground bait, IBBL
- 2 workers; Macao, Coloane Island, Ka Ho Height Family Trail Peak near 1-09-03, 22.12835N 113.57018E, ca 140 m, 25VI2019, MAC\_S14\_B10\_Sp.1, F. Brassard leg., Ground bait, IBBL
- 1 worker; Macao, Coloane Island, Morro de Hac Sa Family Trail near 1-07-08, 22.1144N 113.56988E, ca 53 m, 5VI2019, MAC\_S15\_B05\_Sp.1, F. Brassard leg., Ground bait, IBBL
- 2 workers; Macao, Coloane Island, Morro de Hac Sa Family Trail near 1-07-08, 22.1144N 113.56988E, ca 53 m, 5VI2019, MAC\_S15\_B07\_Sp.2, F. Brassard leg., Ground bait, IBBL
- 2 workers; Macao, Coloane Island, Morro de Hac Sa Family Trail near 1-07-08, 22.1144N 113.56988E, ca 53 m, 5VI2019, MAC\_S15\_B11\_Sp.1, F. Brassard leg., Ground bait, IBBL
- 2 workers; Macao, Coloane Island, Ka Ho Reservoir Hillside, 22.13328N 113.57437E, ca 85 m, 9IV2019-24IV2019, MAC\_S9\_25\_q2\_Sp.1, F. Brassard leg., Subterranean trap, IBBL
- 2 workers; Macao, Coloane Island, Coloane Trail near 1-01-10, 22.11652N 113.55888E, ca 102 m, 10IV2019-25IV2019, MAC\_S10\_q3\_50\_Sp.1, F. Brassard leg., Subterranean trap, IBBL
- 2 workers; Macao, Coloane Island, Coloane North East Hiking Trail, 22.1351N 113.57E, ca 78 m, 14V2019-4VI2019, MAC\_S12\_37.5\_q3\_Sp.4, F. Brassard leg., Subterranean trap, IBBL
- 2 workers; Macao, Coloane Island, Coloane North East Hiking Trail, 22.1351N 113.57E, ca 78 m, 14V2019-4VI2019, MAC\_S12\_50\_q4\_Sp.1, F. Brassard leg., Subterranean trap, IBBL
- 2 workers; Macao, Coloane Island, Ka Ho Height Family Trail Peak near 1-09-03, 22.12835N 113.57018E, ca 140 m, 16V2019-4VI2019, MAC\_S14\_12.5\_q3\_Sp.1, F. Brassard leg., Subterranean trap, IBBL
- 2 workers; Macao, Coloane Island, Ka Ho Lighthouse 2, 22.12923N 113.59092E, ca 34 m, 21V2019-6VI2019, MAC\_S17\_12.5\_q2\_Sp.1, F. Brassard leg., Subterranean trap, IBBL • 1 worker; Macao, Ka Ho Reservoir, 11VII2015, CM. Leong leg. • 2 workers; Macao, Siu Tam Hill, 18VII2015, CM. Leong leg. • 2 workers; Macao, Siu Tam Hill, 31VII2015, CM. Leong leg. • 3 workers; Macao, Ka Ho Reservoir, 31VII2015, CM. Leong leg. • 3 workers; Macao, Tai Tam Hill, 25IX2015, CY. Lei leg. • 2 workers; Macao,

Ka Ho Reservoir, 14VIII2016, CM. Leong leg. • 5 workers; Macao, Hac Sa Reservoir, 20VIII2016, CM. Leong leg. • 1 worker; Macao, Ka Ho Reservoir, 23VIII2016, CM. Leong leg. • 3 workers; Macao, Tam Hill, 26VIII2016, CM. Leong leg.

***Crematogaster binghamii* Forel, 1904**

**Material examined.** MACAO SAR, CHINA • 2 workers; Macao, Coloane Island, Coloane Trail near C3, 22.1217N 113.556E, ca 105 m, 11VII2019, MAC\_S21\_B08\_Sp.1, F. Brassard leg., Ground bait, IBBL

***Crematogaster ferrarii* Emery, 1888**

**Material examined.** MACAO SAR, CHINA

- 2 workers; Macao, Coloane Island, Hillside Department of Green Areas and Gardens, 22.12747N 113.56118E, ca 69 m, 24IX2019, MAC\_S16\_T4\_2m\_Sp.3, F. Brassard leg., Arboreal bait, IBBL
- 2 workers; Macao, Coloane Island, Ka Ho Lighthouse 2, 22.12923N 113.59092E, ca 34 m, 24IX2019, MAC\_S17\_T1\_1m\_Sp.1, F. Brassard leg., Arboreal bait, IBBL
- 2 workers; Macao, Coloane Island, Coloane Trail near C3, 22.1217N 113.556E, ca 105 m, 11VII2019, MAC\_S21\_B10\_Sp.2, F. Brassard leg., Ground bait, IBBL
- 3 workers; Macao, Coloane Island, Coloane Trail near C13, 22.12144N 113.56485E, ca 107 m, 18III2019, MAC\_S01\_LLSA\_sp.1, F. Brassard leg., Leaf litter extraction (standardized area), IBBL
- 1 queen; Macao, Coloane Island, Ka Ho Lighthouse 1, 22.12936N 113.59137E, ca 26 m, 20III2019, MAC\_S04\_LLSA\_Sp.5, F. Brassard leg., Leaf litter extraction (standardized area), IBBL
- 1 worker; Macao, Coloane Island, Hac Sa Reservoir Family Trail near 1-05-12, 22.1237N 113.5684E, ca 91 m, 8IV2019, MAC\_S06\_LLSA\_Sp.2, F. Brassard leg., Leaf litter extraction (standardized area), IBBL
- 1 worker; Macao, Coloane Island, Hama Temple Estatua da Deusa A-ma, 22.1237N 113.5636E, ca 161 m, 8IV2019, MAC\_S07\_LLSA\_Sp.2, F. Brassard leg., Leaf litter extraction (standardized area), IBBL
- 1 worker; Macao, Coloane Island, Hama Temple Estatua da Deusa A-ma, 22.1237N 113.5636E, ca 161 m, 8IV2019, MAC\_S07\_LLSA\_Sp.3, F. Brassard leg., Leaf litter extraction (standardized area), IBBL
- 2 workers; Macao, Coloane Island, Coloane Trail near 1-01-10, 22.11652N 113.55888E, ca 102 m, 10IV2019, MAC\_S10\_LLSA\_Sp.8, F. Brassard leg., Leaf litter extraction (standardized area), IBBL
- 1 worker; Macao, Coloane Island, Coloane Trail near C13, 22.12144N 113.56485E, ca 107 m, 18III2019, MAC\_S01\_LLSP\_sp.7, F. Brassard leg., Leaf litter extraction (species pool), IBBL
- 2 workers; Macao, Coloane Island, Ka Ho Reservoir Freshwater Wetland, 22.13478N 113.57333E, ca 54 m, 9IV2019, MAC\_S08\_LLSP\_Sp.1, F. Brassard leg., Leaf litter extraction (species pool), IBBL
- 1 worker; Macao, Coloane Island, Ka Ho Reservoir Hillside, 22.13328N 113.57437E, ca 85 m, 9IV2019, MAC\_S09\_LLSP\_Sp.6, F. Brassard leg., Leaf litter extraction (species pool), IBBL
- 2 workers; Macao, Coloane Island, Ka Ho Height Family Trail Peak near 1-09-03, 22.12835N 113.57018E, ca 140 m, 16V2019, MAC\_S14\_LLSP\_Sp.15, F. Brassard leg., Leaf litter extraction (species pool), IBBL
- 1 queen; Macao, Coloane Island, Oscar Farm hillside, 22.1131N 113.5557E, ca 83 m, 24VI2019, MAC\_S18\_LLSP\_Sp.8, F. Brassard leg., Leaf litter extraction (species pool), IBBL • 1 worker; Macao, Hac Sa Reservoir, 29VII2015, CM. Leong leg. • 1 worker; Macao, Ka Ho Reservoir, 23VIII2015, CM. Leong leg.

***Crematogaster quadriruga* Forel, 1911**

**Material examined.** MACAO SAR, CHINA

- 2 workers; Macao, Coloane Island, Hillside Department of Green Areas and Gardens, 22.12747N 113.56118E, ca 69 m, 5VI2019, MAC\_S16\_B04\_Sp.3, F. Brassard leg., Ground bait, IBBL
- 1 worker; Macao, Coloane Island, Coloane Trail near 1-01-10, 22.11652N 113.55888E, ca 102 m, 25IV2019-28VIII2019, MAC\_S10\_GN4\_H4\_n2, F. Brassard leg., Ground nest, IBBL
- 1 queen; Macao, Coloane Island, Coloane Trail near 1-01-10, 22.11652N 113.55888E, ca 102 m, 25IV2019-28VIII2019, MAC\_S10\_GN4\_H4\_n2, F. Brassard leg., Ground nest, IBBL
- 3 workers; Macao, Coloane Island, Wetland Alto de Coloane, 22.123N 113.55966E, ca 93 m, 19III2019, MAC\_S02\_LLSA\_Sp.4, F. Brassard leg., Leaf litter extraction (standardized area), IBBL
- 2 workers; Macao, Coloane Island, Hac Sa Reservoir Family Trail near 1-05-12, 22.1237N 113.5684E, ca 91 m, 8IV2019, MAC\_S06\_LLSA\_Sp.1, F. Brassard leg., Leaf litter extraction (standardized area), IBBL
- 1 worker; Macao, Coloane Island, Coloane Trail near 1-01-10, 22.11652N 113.55888E, ca 102 m, 10IV2019, MAC\_S10\_LLSA\_Sp.3, F. Brassard leg., Leaf litter extraction (standardized area), IBBL
- 1 worker; Macao, Coloane Island, Hillside Department of Green Areas and Gardens, 22.12747N 113.56118E, ca 69 m, 20V2019, MAC\_S16\_LLSA\_Sp.6, F. Brassard leg., Leaf litter extraction (standardized area), IBBL
- 1 queen; Macao, Coloane Island, Hillside Department of Green Areas and Gardens, 22.12747N 113.56118E, ca 69 m, 20V2019, MAC\_S16\_LLSA\_Sp.6, F. Brassard leg., Leaf litter extraction (standardized area), IBBL
- 1 worker; Macao, Coloane Island, Ka Ho Reservoir Hillside, 22.13328N 113.57437E, ca 85 m, 9IV2019, MAC\_S09\_LLSP\_Sp.10, F. Brassard leg., Leaf litter extraction (species pool), IBBL
- 1 worker; Macao, Coloane Island, Coloane North East Hiking Trail, 22.1351N 113.57E, ca 78 m, 14V2019, MAC\_S12\_LLSP\_Sp.2, F. Brassard leg., Leaf litter extraction (species pool), IBBL
- 1 worker; Macao, Coloane Island, Morro de Hac Sa Family Trail near 1-07-08, 22.1144N 113.56988E, ca 53 m, 17V2019, MAC\_S15\_LLSP\_Sp.4, F. Brassard leg., Leaf litter extraction (species pool), IBBL
- 1 intercaste; Macao, Coloane Island, Ka Ho Lighthouse 2, 22.12923N 113.59092E, ca 34 m, 21V2019, MAC\_S17\_LLSP\_Sp.3, F. Brassard leg., Leaf litter extraction (species pool), IBBL
- 1 worker; Macao, Coloane Island, Ka Ho Lighthouse 2, 22.12923N 113.59092E, ca 34 m, 21V2019, MAC\_S17\_LLSP\_Sp.3, F. Brassard leg., Leaf litter extraction (species pool), IBBL
- 2 workers; Macao, Coloane Island, Oscar Farm hillside, 22.1131N 113.5557E, ca 83 m, 24VI2019, MAC\_S18\_LLSP\_Sp.6, F. Brassard leg., Leaf litter extraction (species pool), IBBL
- 2 workers; Macao, Coloane Island, Coloane Trail near C3, 22.1217N 113.556E, ca 105 m, 27VI2019, MAC\_S21\_LLSP\_Sp.5, F. Brassard leg., Leaf litter extraction (species pool), IBBL • 1 worker; Macao, Ka Ho Reservoir, 14VII2016, CM. Leong leg.

***Crematogaster rogenhoferi* Mayr, 1879**

**Material examined. MACAO SAR, CHINA**

- 2 workers; Macao, Coloane Island, Hac Sa Reservoir Family Trail near 1-05-12, 22.1237N 113.5684E, ca 91 m, 8VIII2019, MAC\_S6\_T4\_3m\_Sp.2, F. Brassard leg., Arboreal bait, IBBL
- 1 worker; Macao, Coloane Island, Hamma Temple Estatua da Deusa A-ma, 22.1237N 113.5636E, ca 161 m, 8VIII2019, MAC\_S7\_T3\_3m\_sp.3, F. Brassard leg., Arboreal bait, IBBL
- 1 worker; Macao, Coloane Island, Hamma Temple Estatua da Deusa A-ma, 22.1237N 113.5636E, ca 161 m, 8VIII2019, MAC\_S7\_T4\_1m\_sp.2, F. Brassard leg., Arboreal bait, IBBL
- 2 workers; Macao, Coloane Island, Ka Ho Reservoir Hillside, 22.13328N 113.57437E, ca 85 m, 27VIII2019, MAC\_S9\_T4\_3m\_Sp.1, F. Brassard leg., Arboreal bait, IBBL
- 1 worker; Macao, Coloane Island, Oscar Farm hillside, 22.1131N 113.5557E, ca 83 m, 26IX2019, MAC\_S18\_T4\_5m\_Sp.1, F. Brassard leg., Arboreal bait, IBBL

- 2 workers; Macao, Coloane Island, Caesar Golf Center, 22.13505N 113.56115E, ca 7 m, 26IX2019, MAC\_S19\_T4\_1m\_Sp.1, F. Brassard leg., Arboreal bait, IBBL
- 2 workers; Macao, Coloane Island, Cotai Ecological Zone II, 22.1418N 113.5519E, ca 2 m, 9X2019, MAC\_S20\_T3\_5m\_Sp.2, F. Brassard leg., Arboreal bait, IBBL
- 1 worker; Macao, Coloane Island, Cotai Ecological Zone II, 22.1418N 113.5519E, ca 2 m, 9X2019, MAC\_S20\_T4\_1m\_Sp.1, F. Brassard leg., Arboreal bait, IBBL
- 1 worker; Macao, Coloane Island, Coloane Trail near C3, 22.1217N 113.556E, ca 105 m, 9X2019, MAC\_S21\_T1\_1m\_Sp.2, F. Brassard leg., Arboreal bait, IBBL • 1 worker; Macao, Tai Tam Hill, 29VII2015, CM. Leong leg. • 1 worker; Macao, Ka Ho Reservoir, 31VII2015, CM. Leong leg. • 1 worker; Macao, Siu Tam Hill, 5VIII2015, CM. Leong leg. • 1 worker; Macao, Tai Tam Hill, 5VIII2015, CM. Leong leg. • 1 worker; Macao, Tai Tam Hill, 20VIII2015, CM. Leong leg. • 2 workers; Macao, Tai Tam Hill, 25IX2015, CY. Lei leg. • 1 worker; Macao, Hac Sa Reservoir, 20VIII2016, CM. Leong leg. • 1 worker; Macao, Guia Hill, 20VIII2016, CM. Leong leg. • 1 worker; Macao, Siu Tam Hill, 26VIII2016, CM. Leong leg. • 1 worker; Macao, Guia Hill, 27VIII2016, CM. Leong leg. • 2 workers; Macao, Ecological Protection Area I & II, 12I2017, CM. Leong leg.

***Dilobocondyla propotriangulata*, Bharti & Kumar, 2013**

**Material examined.** MACAO SAR, CHINA

- 1 worker; Macao, Coloane Island, Ka Ho Height Family Trail Peak near 1-09-03, 22.12835N 113.57018E, ca 180 m, 16V2019, FB19145, F. Brassard leg., Hand collection, IBBL
- 1 worker; Macao, Coloane Island, Seaside\_Cliffs, 22.12923N 113.59092E, ca 30 m, 21V2019, FB19171, F. Brassard leg., Hand collection, IBBL

***Mayriella granulata*, Dlussky & Radchenko, 1990**

**Material examined.** MACAO SAR, CHINA

- 2 workers; Macao, Coloane Island, Oscar Farm hillside, 22.1131N 113.5557E, ca 83 m, 24VI2019, MAC\_S18\_LLSA\_Sp.4, F. Brassard leg., Leaf litter extraction (standardized area), IBBL
- 1 queen; Macao, Coloane Island, Coloane Trail near 1-01-10, 22.11652N 113.55888E, ca 102 m, 10IV2019, MAC\_S10\_LLSP\_Sp.6, F. Brassard leg., Leaf litter extraction (species pool), IBBL
- 1 worker; Macao, Coloane Island, Oscar Farm hillside, 22.1131N 113.5557E, ca 83 m, 24VI2019, MAC\_S18\_LLSP\_Sp.5, F. Brassard leg., Leaf litter extraction (species pool), IBBL

***Meranoplus* sp. mo01 nr. *bicolor* Guérin-Méneville, 1844**

**Material examined.** MACAO SAR, CHINA • 1 worker; Macao, Siu Tam Hill, 26VIII2016, CM. Leong leg.

***Monomorium chinense* Santschi, 1925**

**Material examined.** MACAO SAR, CHINA

- 1 worker; Macao, Coloane Island, Caesar Golf Center, 22.13505N 113.56115E, ca 7 m, 25VI2019, MAC\_S19\_LLSA\_Sp.7, F. Brassard leg., Leaf litter extraction (standardized area), IBBL
- 1 worker; Macao, Coloane Island, Cotai Ecological Zone II, 22.1418N 113.5519E, ca 2 m, 26VI2019, MAC\_S20\_LLSA\_Sp.5, F. Brassard leg., Leaf litter extraction (standardized area), IBBL

- 1 worker; Macao, Coloane Island, Ka Ho Reservoir Hillside, 22.13328N 113.57437E, ca 85 m, 9IV2019, MAC\_S09\_LLSP\_Sp.3, F. Brassard leg., Leaf litter extraction (species pool), IBBL
- 1 worker; Macao, Coloane Island, Cotai Ecological Zone II, 22.1418N 113.5519E, ca 2 m, 26VI2019, MAC\_S20\_LLSP\_Sp.12, F. Brassard leg., Leaf litter extraction (species pool), IBBL
- 2 workers; Macao, Coloane Island, Cotai Ecological Zone II, 22.1418N 113.5519E, ca 2 m, 26VI2019-11VII2019, MAC\_S20\_12.5\_q4\_Sp.1, F. Brassard leg., Subterranean trap, IBBL

***Monomorium intrudens* Smith, 1874**

**Material examined. MACAO SAR, CHINA**

- 2 workers; Macao, Coloane Island, Hillside Department of Green Areas and Gardens, 22.12747N 113.56118E, ca 69 m, 5VI2019-23IX2019, MAC\_S16\_GN3\_H1\_n1, F. Brassard leg., Ground nest, IBBL
- 1 queen; Macao, Coloane Island, Hillside Department of Green Areas and Gardens, 22.12747N 113.56118E, ca 69 m, 5VI2019-23IX2019, MAC\_S16\_GN3\_H1\_n1, F. Brassard leg., Ground nest, IBBL
- 1 queen; Macao, Coloane Island, Oscar Farm hillside, 22.1131N 113.5557E, ca 83 m, 8VII2019-25IX2019, MAC\_S18\_GN4\_H2\_n1, F. Brassard leg., Ground nest, IBBL
- 1 worker; Macao, Coloane Island, Oscar Farm hillside, 22.1131N 113.5557E, ca 83 m, 8VII2019-25IX2019, MAC\_S18\_GN4\_H2\_n1, F. Brassard leg., Ground nest, IBBL
- 2 workers; Macao, Coloane Island, Seoc Pai Van Park, 22.12492N 113.55663E, ca 35 m, 20III2019, MAC\_S05\_LLSA\_Sp.3, F. Brassard leg., Leaf litter extraction (standardized area), IBBL
- 2 workers; Macao, Coloane Island, Ka Ho Reservoir Freshwater Wetland, 22.13478N 113.57333E, ca 54 m, 9IV2019, MAC\_S08\_LLSA\_Sp.3, F. Brassard leg., Leaf litter extraction (standardized area), IBBL
- 1 queen; Macao, Coloane Island, Ka Ho Reservoir Freshwater Wetland, 22.13478N 113.57333E, ca 54 m, 9IV2019, MAC\_S08\_LLSA\_Sp.3, F. Brassard leg., Leaf litter extraction (standardized area), IBBL
- 2 workers; Macao, Coloane Island, Coloane North East Hiking Trail, 22.1351N 113.57E, ca 78 m, 14V2019, MAC\_S12\_LLSA\_Sp.7, F. Brassard leg., Leaf litter extraction (standardized area), IBBL
- 1 worker; Macao, Coloane Island, Macau Golf & Country Club, 22.12481N 113.57902E, ca 19 m, 15V2019, MAC\_S13\_LLSA\_Sp.4, F. Brassard leg., Leaf litter extraction (standardized area), IBBL
- 2 workers; Macao, Coloane Island, Hillside Department of Green Areas and Gardens, 22.12747N 113.56118E, ca 69 m, 20V2019, MAC\_S16\_LLSA\_Sp.13, F. Brassard leg., Leaf litter extraction (standardized area), IBBL
- 1 worker; Macao, Coloane Island, Oscar Farm hillside, 22.1131N 113.5557E, ca 83 m, 24VI2019, MAC\_S18\_LLSA\_Sp.15, F. Brassard leg., Leaf litter extraction (standardized area), IBBL
- 2 workers; Macao, Coloane Island, Oscar Farm hillside, 22.1131N 113.5557E, ca 83 m, 24VI2019, MAC\_S18\_LLSA\_Sp.3, F. Brassard leg., Leaf litter extraction (standardized area), IBBL
- 1 worker; Macao, Coloane Island, Wetland Alto de Coloane, 22.123N 113.55966E, ca 93 m, 19III2019, MAC\_S02\_LLSP\_Sp.1, F. Brassard leg., Leaf litter extraction (species pool), IBBL
- 1 worker; Macao, Coloane Island, Seoc Pai Van Park, 22.12492N 113.55663E, ca 35 m, 20III2019, MAC\_S05\_LLSP\_Sp.4, F. Brassard leg., Leaf litter extraction (species pool), IBBL
- 1 worker; Macao, Coloane Island, Ka Ho Reservoir Freshwater Wetland, 22.13478N 113.57333E, ca 54 m, 9IV2019, MAC\_S08\_LLSP\_Sp.4, F. Brassard leg., Leaf litter extraction (species pool), IBBL
- 2 workers; Macao, Coloane Island, Coloane North East Hiking Trail, 22.1351N 113.57E, ca 78 m, 14V2019, MAC\_S12\_LLSP\_Sp.6, F. Brassard leg., Leaf litter extraction (species pool), IBBL
- 2 workers; Macao, Coloane Island, Hillside Department of Green Areas and Gardens, 22.12747N 113.56118E, ca 69 m, 20V2019, MAC\_S16\_LLSP\_Sp.6, F. Brassard leg., Leaf litter extraction (species pool), IBBL

- 1 worker; Macao, Coloane Island, Oscar Farm hillside, 22.1131N 113.5557E, ca 83 m, 24VI2019, MAC\_S18\_LLSP\_Sp.3, F. Brassard leg., Leaf litter extraction (species pool), IBBL
- 1 queen; Macao, Coloane Island, Oscar Farm hillside, 22.1131N 113.5557E, ca 83 m, 24VI2019, MAC\_S18\_LLSP\_Sp.3, F. Brassard leg., Leaf litter extraction (species pool), IBBL

***Monomorium floricola* Jerdon, 1851**

**Material examined.** MACAO SAR, CHINA

- 1 queen; Macao, Coloane Island, Caesar Golf Center, 22.13505N 113.56115E, ca 7 m, 10VII2019-26IX2019, MAC\_S19\_GN1\_H1\_n1, F. Brassard leg., Ground nest, IBBL
- 1 worker; Macao, Coloane Island, Wetland Alto de Coloane, 22.123N 113.55966E, ca 93 m, 19III2019, MAC\_S02\_LLSA\_Sp.3, F. Brassard leg., Leaf litter extraction (standardized area), IBBL
- 1 queen; Macao, Coloane Island, Hac Sa Reservoir near C21, 22.12659N 113.57272E, ca 69 m, 19III2019, MAC\_S03\_LLSA\_Sp.8, F. Brassard leg., Leaf litter extraction (standardized area), IBBL
- 1 worker; Macao, Coloane Island, Hac Sa Reservoir near C21, 22.12659N 113.57272E, ca 69 m, 19III2019, MAC\_S03\_LLSA\_Sp.8, F. Brassard leg., Leaf litter extraction (standardized area), IBBL
- 1 worker; Macao, Coloane Island, Hac Sa Reservoir near C21, 22.12659N 113.57272E, ca 69 m, 19III2019, MAC\_S03\_LLSP\_Sp.3, F. Brassard leg., Leaf litter extraction (species pool), IBBL
- 1 worker; Macao, Coloane Island, Cotai Ecological Zone II, 22.1418N 113.5519E, ca 2 m, 26VI2019, MAC\_S20\_LLSP\_Sp.2, F. Brassard leg., Leaf litter extraction (species pool), IBBL
- 1 worker; Macao, Coloane Island, Oscar Farm hillside, 22.1131N 113.5557E, ca 83 m, 24VI2019-8VII2019, MAC\_S18\_25\_q1\_Sp.4, F. Brassard leg., Subterranean trap, IBBL
- 1 worker; Macao, Coloane Island, Coloane Trail near C3, 22.1217N 113.556E, ca 105 m, 27VI2019-10VII2019, MAC\_S21\_q3\_50\_Sp.2, F. Brassard leg., Subterranean trap, IBBL
- 1 worker; Macao, Penha Hill, 6VIII2015, CM. Leong leg.

***Monomorium pharaonis* Linnaeus, 1758**

**Material examined.** MACAO SAR, CHINA

- 3 workers; Macao, Coloane Island, Coloane Trail near C13, 22.12144N 113.56485E, ca 107 m, 18III2019, MAC\_S01\_LLSA\_sp.2, F. Brassard leg., Leaf litter extraction (standardized area), IBBL
- 1 worker; Macao, Coloane Island, Wetland Alto de Coloane, 22.123N 113.55966E, ca 93 m, 19III2019, MAC\_S02\_LLSA\_Sp.5, F. Brassard leg., Leaf litter extraction (standardized area), IBBL
- 2 workers; Macao, Coloane Island, Ka Ho Reservoir Hillside, 22.13328N 113.57437E, ca 85 m, 9IV2019, MAC\_S09\_LLSA\_Sp.9, F. Brassard leg., Leaf litter extraction (standardized area), IBBL
- 1 worker; Macao, Coloane Island, Morro de Hac Sa Family Trail near 1-07-08, 22.1144N 113.56988E, ca 53 m, 17V2019, MAC\_S15\_LLSA\_Sp.3, F. Brassard leg., Leaf litter extraction (standardized area), IBBL
- 1 worker; Macao, Coloane Island, Hillside Department of Green Areas and Gardens, 22.12747N 113.56118E, ca 69 m, 20V2019, MAC\_S16\_LLSA\_Sp.8, F. Brassard leg., Leaf litter extraction (standardized area), IBBL
- 1 worker; Macao, Coloane Island, Coloane Trail near C3, 22.1217N 113.556E, ca 105 m, 27VI2019, MAC\_S21\_LLSA\_Sp.1, F. Brassard leg., Leaf litter extraction (standardized area), IBBL
- 2 workers; Macao, Coloane Island, Coloane Trail near C13, 22.12144N 113.56485E, ca 107 m, 18III2019, MAC\_S01\_LLSP\_sp.3, F. Brassard leg., Leaf litter extraction (species pool), IBBL
- 2 workers; Macao, Coloane Island, Wetland Alto de Coloane, 22.123N 113.55966E, ca 93 m, 19III2019, MAC\_S02\_LLSP\_Sp.2, F. Brassard leg., Leaf litter extraction (species pool), IBBL



- 1 worker; Macao, Coloane Island, Ka Ho Reservoir Freshwater Wetland, 22.13478N 113.57333E, ca 54 m, 9IV2019, MAC\_S08\_LLSP\_Sp.6, F. Brassard leg., Leaf litter extraction (species pool), IBBL
- 2 workers; Macao, Coloane Island, Ka Ho Reservoir Hillside, 22.13328N 113.57437E, ca 85 m, 9IV2019, MAC\_S09\_LLSP\_Sp.12, F. Brassard leg., Leaf litter extraction (species pool), IBBL
- 1 worker; Macao, Coloane Island, Ka Ho Reservoir Hillside, 22.13328N 113.57437E, ca 85 m, 9IV2019-24IV2019, MAC\_S9\_25\_q2\_Sp.4, F. Brassard leg., Subterranean trap, IBBL • 1 worker; Macao, Hac Sa Reservoir, 29VII2017, CM. Leong leg.

***Monomorium* sp. Psw-cn01**

**Material examined. MACAO SAR, CHINA**

- 1 worker; Macao, Coloane Island, Coloane Trail near C13, 22.12144N 113.56485E, ca 107 m, 18III2019, MAC\_S01\_LLSA\_Sp.5, F. Brassard leg., Leaf litter extraction (standardized area), IBBL
- 2 workers; Macao, Coloane Island, Hac Sa Reservoir Family Trail near 1-05-12, 22.1237N 113.5684E, ca 91 m, 8IV2019, MAC\_S06\_LLSA\_Sp.4, F. Brassard leg., Leaf litter extraction (standardized area), IBBL
- 1 queen; Macao, Coloane Island, Hac Sa Reservoir Family Trail near 1-05-12, 22.1237N 113.5684E, ca 91 m, 8IV2019, MAC\_S06\_LLSA\_Sp.4, F. Brassard leg., Leaf litter extraction (standardized area), IBBL
- 1 worker; Macao, Coloane Island, Hamma Temple Estatua da Deusa A-ma, 22.1237N 113.5636E, ca 161 m, 8IV2019, MAC\_S07\_LLSA\_Sp.6, F. Brassard leg., Leaf litter extraction (standardized area), IBBL
- 1 worker; Macao, Coloane Island, Ka Ho Reservoir Hillside, 22.13328N 113.57437E, ca 85 m, 9IV2019, MAC\_S09\_LLSA\_Sp.1, F. Brassard leg., Leaf litter extraction (standardized area), IBBL
- 1 worker; Macao, Coloane Island, Ka Ho Height Family Trail Peak near 1-09-03, 22.12835N 113.57018E, ca 140 m, 16V2019, MAC\_S14\_LLSA\_Sp.7, F. Brassard leg., Leaf litter extraction (standardized area), IBBL
- 1 queen; Macao, Coloane Island, Ka Ho Height Family Trail Peak near 1-09-03, 22.12835N 113.57018E, ca 140 m, 16V2019, MAC\_S14\_LLSA\_Sp.7, F. Brassard leg., Leaf litter extraction (standardized area), IBBL
- 1 worker; Macao, Coloane Island, Hillside Department of Green Areas and Gardens, 22.12747N 113.56118E, ca 69 m, 20V2019, MAC\_S16\_LLSA\_Sp.14, F. Brassard leg., Leaf litter extraction (standardized area), IBBL
- 2 workers; Macao, Coloane Island, Ka Ho Lighthouse 2, 22.12923N 113.59092E, ca 34 m, 21V2019, MAC\_S17\_LLSA\_Sp.11, F. Brassard leg., Leaf litter extraction (standardized area), IBBL
- 2 workers; Macao, Coloane Island, Coloane Trail near C3, 22.1217N 113.556E, ca 105 m, 27VI2019, MAC\_S21\_LLSA\_Sp.2, F. Brassard leg., Leaf litter extraction (standardized area), IBBL
- 1 worker; Macao, Coloane Island, Hac Sa Reservoir Family Trail near 1-05-12, 22.1237N 113.5684E, ca 91 m, 8IV2019, MAC\_S06\_LLSP\_Sp.2, F. Brassard leg., Leaf litter extraction (species pool), IBBL
- 2 workers; Macao, Coloane Island, Ka Ho Reservoir Hillside, 22.13328N 113.57437E, ca 85 m, 9IV2019, MAC\_S09\_LLSP\_Sp.4, F. Brassard leg., Leaf litter extraction (species pool), IBBL
- 2 workers; Macao, Coloane Island, Coloane Trail near 1-01-10, 22.11652N 113.55888E, ca 102 m, 10IV2019, MAC\_S10\_LLSP\_Sp.8, F. Brassard leg., Leaf litter extraction (species pool), IBBL
- 2 workers; Macao, Coloane Island, Ka Ho Height Family Trail Peak near 1-09-03, 22.12835N 113.57018E, ca 140 m, 16V2019, MAC\_S14\_LLSP\_Sp.11, F. Brassard leg., Leaf litter extraction (species pool), IBBL
- 2 workers; Macao, Coloane Island, Hillside Department of Green Areas and Gardens, 22.12747N 113.56118E, ca 69 m, 20V2019, MAC\_S16\_LLSP\_Sp.7, F. Brassard leg., Leaf litter extraction (species pool), IBBL
- 1 worker; Macao, Coloane Island, Ka Ho Lighthouse 2, 22.12923N 113.59092E, ca 34 m, 21V2019, MAC\_S17\_LLSP\_Sp.10, F. Brassard leg., Leaf litter extraction (species pool), IBBL

- 1 worker; Macao, Coloane Island, Coloane Trail near C3, 22.1217N 113.556E, ca 105 m, 27VI2019, MAC\_S21\_LLSP\_Sp.3, F. Brassard leg., Leaf litter extraction (species pool), IBBL
- 1 queen; Macao, Coloane Island, Coloane Trail near C3, 22.1217N 113.556E, ca 105 m, 27VI2019, MAC\_S21\_LLSP\_Sp.3, F. Brassard leg., Leaf litter extraction (species pool), IBBL
- 2 workers; Macao, Coloane Island, Ka Ho Reservoir Hillside, 22.13328N 113.57437E, ca 85 m, 24IV2019, MAC\_S09\_B11\_Sp.1, F. Brassard leg., Ground bait, IBBL • 1 worker; Macao, Siu Tam Hill, 26VIII2016, CM. Leong leg.

***Myrmecina nomurai* Zhou, 2001**

**Material examined.** MACAO SAR, CHINA

- 1 worker; Macao, Coloane Island, Coloane Trail near C13, 22.12144N 113.56485E, ca 107 m, 18III2019, MAC\_S01\_LLSA\_sp.4, F. Brassard leg., Leaf litter extraction (standardized area), IBBL
- 1 worker; Macao, Coloane Island, Seoc Pai Van Park, 22.12492N 113.55663E, ca 35 m, 20III2019, MAC\_S05\_LLSA\_Sp.1, F. Brassard leg., Leaf litter extraction (standardized area), IBBL
- 1 worker; Macao, Coloane Island, Hillside Department of Green Areas and Gardens, 22.12747N 113.56118E, ca 69 m, 20V2019, MAC\_S16\_LLSP\_Sp.3, F. Brassard leg., Leaf litter extraction (species pool), IBBL

***Myrmecina sinensis* Wheeler, 1921**

**Material examined.** MACAO SAR, CHINA • 1 worker; Macao, Hac Sa Reservoir, 29VII2017, CM. Leong leg.

***Pheidole elongicephala* Eguchi, 2008**

**Material examined.** MACAO SAR, CHINA • 2 workers; Macao, Coloane Island, Ka Ho Reservoir Hillside, 22.13328N 113.57437E, ca 85 m, 9IV2019-24IV2019, MAC\_S9\_25\_q2\_Sp.2, F. Brassard leg., Subterranean trap, IBBL

***Pheidole fervens* Smith, 1858**

**Material examined.** MACAO SAR, CHINA

- 2 workers; Macao, Coloane Island, Caesar Golf Center, 22.13505N 113.56115E, ca 7 m, 25VI2019, MAC\_S19\_LLSA\_Sp.11, F. Brassard leg., Leaf litter extraction (standardized area), IBBL
- 2 workers; Macao, Coloane Island, Caesar Golf Center, 22.13505N 113.56115E, ca 7 m, 25VI2019-10VII2019, MAC\_S19\_q3\_GL\_01\_Sp.1, F. Brassard leg., Subterranean trap, IBBL
- 2 workers; Macao, Coloane Island, Caesar Golf Center, 22.13505N 113.56115E, ca 7 m, 25VI2019-10VII2019, MAC\_S19\_q3\_GL\_03\_Sp.2, F. Brassard leg., Subterranean trap, IBBL
- 2 workers; Macao, Coloane Island, Caesar Golf Center, 22.13505N 113.56115E, ca 7 m, 25VI2019-10VII2019, MAC\_S19\_q4\_GL\_03\_Sp.2, F. Brassard leg., Subterranean trap, IBBL • 1 worker; Macao, Hac Sa Reservoir, 9I2017, CM. Leong leg.

***Pheidole hongkongensis* Wheeler, 1928**

#### **Material examined. MACAO SAR, CHINA**

- 2 workers; Macao, Coloane Island, Hac Sa Reservoir near C21, 22.12659N 113.57272E, ca 69 m, 19III2019, MAC\_S03\_B02\_Sp.1, F. Brassard leg., Ground bait, IBBL
- 2 workers; Macao, Coloane Island, Hamma Temple Estatua da Deusa A-ma, 22.1237N 113.5636E, ca 161 m, 23IV2019, MAC\_S07\_B08\_Sp.1, F. Brassard leg., Ground bait, IBBL
- 1 worker; Macao, Coloane Island, Coloane Trail near 1-01-15, 22.11507N 113.56448E, ca 83 m, 11IV2019, MAC\_S11\_LLSA\_Sp.5, F. Brassard leg., Leaf litter extraction (standardized area), IBBL
- 1 worker; Macao, Coloane Island, Coloane Trail near C3, 22.1217N 113.556E, ca 105 m, 27VI2019, MAC\_S21\_LLSA\_Sp.6, F. Brassard leg., Leaf litter extraction (standardized area), IBBL
- 2 workers; Macao, Coloane Island, Coloane Trail near C3, 22.1217N 113.556E, ca 105 m, 27VI2019, MAC\_S21\_LLSP\_Sp.9, F. Brassard leg., Leaf litter extraction (species pool), IBBL • 1 worker; Macao, Guia Hill, 18VIII, 2016, CM. Leong leg. • 2 workers; Macao, Siu Tam Hill, 26VIII2016, CM. Leong leg. • 1 worker; Macao, Guia Hill, 27VIII2016, CM. Leong leg. • 3 workers; Macao, Hac Sa Reservoir, 29VII2017, CM. Leong leg.

#### ***Pheidole megacephala* Fabricius, 1793**

#### **Material examined. MACAO SAR, CHINA**

- 2 workers; Macao, Coloane Island, Macau Golf & Country Club, 22.12481N 113.57902E, ca 19 m, 6VI2019, MAC\_S13\_B06\_Sp.1, F. Brassard leg., Ground bait, IBBL
- 2 workers; Macao, Coloane Island, Macau Golf & Country Club, 22.12481N 113.57902E, ca 19 m, 15V2019, MAC\_S13\_LLSA\_Sp.1, F. Brassard leg., Leaf litter extraction (standardized area), IBBL
- 1 worker; Macao, Coloane Island, Ka Ho Height Family Trail Peak near 1-09-03, 22.12835N 113.57018E, ca 140 m, 16V2019, MAC\_S14\_LLSA\_Sp.1, F. Brassard leg., Leaf litter extraction (standardized area), IBBL
- 2 workers; Macao, Coloane Island, Macau Golf & Country Club, 22.12481N 113.57902E, ca 19 m, 15V2019, MAC\_S13\_LLSP\_Sp.1, F. Brassard leg., Leaf litter extraction (species pool), IBBL
- 1 worker; Macao, Coloane Island, Morro de Hac Sa Family Trail near 1-07-08, 22.1144N 113.56988E, ca 53 m, 17V2019, MAC\_S15\_LLSP\_Sp.5, F. Brassard leg., Leaf litter extraction (species pool), IBBL
- 2 workers; Macao, Coloane Island, Macau Golf & Country Club, 22.12481N 113.57902E, ca 19 m, 15V2019-6VI2019, MAC\_S13\_12.5\_q1\_Sp.1, F. Brassard leg., Subterranean trap, IBBL
- 1 worker; Macao, Coloane Island, Macau Golf & Country Club, 22.12481N 113.57902E, ca 19 m, 15V2019-6VI2019, MAC\_S13\_25\_q1\_Sp.1, F. Brassard leg., Subterranean trap, IBBL
- 1 worker; Macao, Coloane Island, Macau Golf & Country Club, 22.12481N 113.57902E, ca 19 m, 15V2019-6VI2019, MAC\_S13\_50\_q2\_Sp.1, F. Brassard leg., Subterranean trap, IBBL • 2 workers; Macao, Guia Hill, 28VII2015, CM. Leong leg. • 2 workers; Macao, Hac Sa Reservoir, 29VII2015, CM. Leong leg. • 1 worker; Macao, Tam Kong Temple, 30VII2015, CM. Leong leg. • 2 workers; Macao, Siu Tam Hill, 26VIII2016, CM. Leong leg. • 2 workers; Macao, Siu Tam Hill, 26VIII2016, CM. Leong leg. • 2 workers; Macao, Ecological Protection Area I & II, 12I2017, CM. Leong leg. • 2 workers; Macao, Ilha Verde Hill, 25I2017, CM. Leong leg. • 13 workers; Macao, Tai Tam Hill, 2VIII2017, B. Guénard leg.

#### ***Pheidole nodus* Smith, 1874**

#### **Material examined. MACAO SAR, CHINA**

- 2 workers; Macao, Coloane Island, Wetland Alto de Coloane, 22.123N 113.55966E, ca 93 m, 19III2019, MAC\_S02\_B09\_Sp.1, F. Brassard leg., Ground bait, IBBL

- 2 workers; Macao, Coloane Island, Morro de Hac Sa Family Trail near 1-07-08, 22.1144N 113.56988E, ca 53 m, 5VI2019, MAC\_S15\_B01\_Sp.3, F. Brassard leg., Ground bait, IBBL
- 2 workers; Macao, Guia Hill, 15VII2015, CM. Leong leg.
- 1 worker; Macao, Tam Kong Temple, 30VII2015, CM. Leong leg.
- 1 worker; Macao, Ka Ho Reservoir, 1VI2016, CY. Leig leg.
- 1 dealate queen; Macao, Ka Ho Reservoir, 1VI2016, CY. Leig leg.
- 1 male; Macao, Ka Ho Reservoir, 1VI2016, CY. Leig leg.
- 1 worker; Macao, Hac Sa Reservoir, 20VIII2016, CM. Leong leg.
- 12 workers; Macao, Hac Sa Reservoir, 2VIII2017, B. Guénard leg.

***Pheidole ochracea* Eguchi, 2008**

**Material examined. MACAO SAR, CHINA**

- 2 workers; Macao, Coloane Island, Wetland Alto de Coloane, 22.123N 113.55966E, ca 93 m, 19III2019, MAC\_S02\_B10\_Sp.1, F. Brassard leg., Ground bait, IBBL
- 2 workers; Macao, Coloane Island, Hac Sa Reservoir near C21, 22.12659N 113.57272E, ca 69 m, 19III2019, MAC\_S03\_B03\_Sp.1, F. Brassard leg., Ground bait, IBBL
- 2 workers; Macao, Coloane Island, Seoc Pai Van Park, 22.12492N 113.55663E, ca 35 m, 20III2019, MAC\_S05\_B03\_Sp.1, F. Brassard leg., Ground bait, IBBL
- 2 workers; Macao, Coloane Island, Hillside Department of Green Areas and Gardens, 22.12747N 113.56118E, ca 69 m, 5VI2019, MAC\_S16\_B05\_Sp.1, F. Brassard leg., Ground bait, IBBL
- 2 workers; Macao, Coloane Island, Hillside Department of Green Areas and Gardens, 22.12747N 113.56118E, ca 69 m, 5VI2019, MAC\_S16\_B09\_Sp.1, F. Brassard leg., Ground bait, IBBL
- 2 workers; Macao, Coloane Island, Hamma Temple Estatua da Deusa A-ma, 22.1237N 113.5636E, ca 161 m, 8IV2019, MAC\_S07\_LLSA\_Sp.4, F. Brassard leg., Leaf litter extraction (standardized area), IBBL
- 2 workers; Macao, Coloane Island, Ka Ho Height Family Trail Peak near 1-09-03, 22.12835N 113.57018E, ca 140 m, 16V2019, MAC\_S14\_LLSA\_Sp.13, F. Brassard leg., Leaf litter extraction (standardized area), IBBL
- 2 workers; Macao, Coloane Island, Morro de Hac Sa Family Trail near 1-07-08, 22.1144N 113.56988E, ca 53 m, 17V2019, MAC\_S15\_LLSA\_Sp.5, F. Brassard leg., Leaf litter extraction (standardized area), IBBL
- 2 workers; Macao, Coloane Island, Hillside Department of Green Areas and Gardens, 22.12747N 113.56118E, ca 69 m, 20V2019, MAC\_S16\_LLSA\_Sp.2, F. Brassard leg., Leaf litter extraction (standardized area), IBBL
- 2 workers; Macao, Coloane Island, Hamma Temple Estatua da Deusa A-ma, 22.1237N 113.5636E, ca 161 m, 8IV2019, MAC\_S07\_LLSP\_Sp.1, F. Brassard leg., Leaf litter extraction (species pool), IBBL
- 2 workers; Macao, Coloane Island, Ka Ho Reservoir Freshwater Wetland, 22.13478N 113.57333E, ca 54 m, 9IV2019, MAC\_S08\_LLSP\_Sp.2, F. Brassard leg., Leaf litter extraction (species pool), IBBL
- 1 worker; Macao, Coloane Island, Ka Ho Reservoir Hillside, 22.13328N 113.57437E, ca 85 m, 9IV2019, MAC\_S09\_LLSP\_Sp.8, F. Brassard leg., Leaf litter extraction (species pool), IBBL
- 2 workers; Macao, Coloane Island, Hillside Department of Green Areas and Gardens, 22.12747N 113.56118E, ca 69 m, 20V2019, MAC\_S16\_LLSP\_Sp.1, F. Brassard leg., Leaf litter extraction (species pool), IBBL
- 1 worker; Macao, Coloane Island, Coloane North East Hiking Trail, 22.1351N 113.57E, ca 78 m, 14V2019-4VI2019, MAC\_S12\_12.5\_q4\_Sp.3, F. Brassard leg., Subterranean trap, IBBL
- 2 workers; Macao, Coloane Island, Coloane North East Hiking Trail, 22.1351N 113.57E, ca 78 m, 14V2019-4VI2019, MAC\_S12\_50\_q1\_Sp.2, F. Brassard leg., Subterranean trap, IBBL
- 2 workers; Macao, Coloane Island, Morro de Hac Sa Family Trail near 1-07-08, 22.1144N 113.56988E, ca 53 m, 17V2019-5VI2019, MAC\_S15\_12.5\_q3\_Sp.1, F. Brassard leg., Subterranean trap, IBBL

- 2 workers; Macao, Coloane Island, Hillside Department of Green Areas and Gardens, 22.12747N 113.56118E, ca 69 m, 20V2019-5VI2019, MAC\_S16\_12.5\_q1\_Sp.1, F. Brassard leg., Subterranean trap, IBBL
- 2 workers; Macao, Coloane Island, Hillside Department of Green Areas and Gardens, 22.12747N 113.56118E, ca 69 m, 20V2019-5VI2019, MAC\_S16\_12.5\_q3\_Sp.1, F. Brassard leg., Subterranean trap, IBBL
- 1 worker; Macao, Ka Ho Reservoir, 14VII2016, CM. Leong leg. • 2 workers; Macao, Hac Sa Reservoir, 2VIII2017 B. Guénard leg.

### ***Pheidole parva* Mayr, 1865**

#### **Material examined. MACAO SAR, CHINA**

- 2 workers; Macao, Coloane Island, Ka Ho Lighthouse 1, 22.12936N 113.59137E, ca 26 m, 20III2019, MAC\_S04\_B08\_Sp.1, F. Brassard leg., Ground bait, IBBL
- 2 workers; Macao, Coloane Island, Caesar Golf Center, 22.13505N 113.56115E, ca 7 m, 10VII2019, MAC\_S19\_B09\_Sp.1, F. Brassard leg., Ground bait, IBBL
- 2 workers; Macao, Coloane Island, Caesar Golf Center, 22.13505N 113.56115E, ca 7 m, 10VII2019, MAC\_S19\_B11\_Sp.1, F. Brassard leg., Ground bait, IBBL
- 2 workers; Macao, Coloane Island, Cotai Ecological Zone II, 22.1418N 113.5519E, ca 2 m, 11VII2019, MAC\_S20\_B03\_Sp.2, F. Brassard leg., Ground bait, IBBL
- 2 workers; Macao, Coloane Island, Cotai Ecological Zone II, 22.1418N 113.5519E, ca 2 m, 11VII2019, MAC\_S20\_B06\_Sp.1, F. Brassard leg., Ground bait, IBBL
- 1 worker; Macao, Coloane Island, Cotai Ecological Zone II, 22.1418N 113.5519E, ca 2 m, 11VII2019, MAC\_S20\_B10\_Sp.1, F. Brassard leg., Ground bait, IBBL
- 1 queen; Macao, Coloane Island, Caesar Golf Center, 22.13505N 113.56115E, ca 7 m, 25VI2019, MAC\_S19\_LLSA\_Sp.3, F. Brassard leg., Leaf litter extraction (standardized area), IBBL
- 2 workers; Macao, Coloane Island, Caesar Golf Center, 22.13505N 113.56115E, ca 7 m, 25VI2019, MAC\_S19\_LLSA\_Sp.9, F. Brassard leg., Leaf litter extraction (standardized area), IBBL
- 2 workers; Macao, Coloane Island, Cotai Ecological Zone II, 22.1418N 113.5519E, ca 2 m, 26VI2019, MAC\_S20\_LLSA\_Sp.4, F. Brassard leg., Leaf litter extraction (standardized area), IBBL
- 2 workers; Macao, Coloane Island, Caesar Golf Center, 22.13505N 113.56115E, ca 7 m, 25VI2019, MAC\_S19\_LLSP\_Sp.7, F. Brassard leg., Leaf litter extraction (species pool), IBBL
- 2 workers; Macao, Coloane Island, Cotai Ecological Zone II, 22.1418N 113.5519E, ca 2 m, 26VI2019, MAC\_S20\_LLSP\_Sp.11, F. Brassard leg., Leaf litter extraction (species pool), IBBL
- 2 workers; Macao, Coloane Island, Caesar Golf Center, 22.13505N 113.56115E, ca 7 m, 25VI2019-10VII2019, MAC\_S19\_q4\_GL\_03\_Sp.3, F. Brassard leg., Subterranean trap, IBBL
- 1 worker; Macao, Coloane Island, Coloane Trail near C3, 22.1217N 113.556E, ca 105 m, 27VI2019-10VII2019, MAC\_S21\_q3\_50\_Sp.1, F. Brassard leg., Subterranean trap, IBBL • 2 workers; Macao, Hac Sa Reservoir, 21VIII2015, CM. Leong leg. • 2 workers; Macao, Hac Sa Reservoir, 2VIII2017, B. Guénard leg.
- 3 workers; Macao, Guia Hill, 20VIII2016, CM. Leong leg.

### ***Pheidole pieli* Santschi, 1925**

#### **Material examined. MACAO SAR, CHINA**

- 1 worker; Macao, Coloane Island, Ka Ho Lighthouse 2, 22.12923N 113.59092E, ca 34 m, 21V2019, MAC\_S17\_LLSA\_Sp.4, F. Brassard leg., Leaf litter extraction (standardized area), IBBL

- 1 worker; Macao, Coloane Island, Oscar Farm hillside, 22.1131N 113.5557E, ca 83 m, 24VI2019-8VII2019, MAC\_S18\_q2\_12.5\_Sp.4, F. Brassard leg., Subterranean trap, IBBL

***Pheidole taipoana* Wheeler, 1928**

**Material examined.** MACAO SAR, CHINA

- 2 workers; Macao, Coloane Island, Coloane Trail near C13, 22.12144N 113.56485E, ca 107 m, 18III2019, MAC\_S01\_B05\_Sp.1, F. Brassard leg., Ground bait, IBBL
- 2 workers; Macao, Coloane Island, Ka Ho Lighthouse 1, 22.12936N 113.59137E, ca 26 m, 20III2019, MAC\_S04\_B07\_Sp.1, F. Brassard leg., Ground bait, IBBL
- 2 workers; Macao, Coloane Island, Coloane North East Hiking Trail, 22.1351N 113.57E, ca 78 m, 4VI2019, MAC\_S12\_B04\_Sp.1, F. Brassard leg., Ground bait, IBBL
- 2 workers; Macao, Coloane Island, Coloane Trail near 1-01-15, 22.11507N 113.56448E, ca 83 m, 11IV2019, MAC\_S11\_LLSA\_Sp.7, F. Brassard leg., Leaf litter extraction (standardized area), IBBL
- 2 workers; Macao, Coloane Island, Ka Ho Lighthouse 1, 22.12936N 113.59137E, ca 26 m, 20III2019, MAC\_S04\_LLSP\_Sp.4, F. Brassard leg., Leaf litter extraction (species pool), IBBL
- 2 workers; Macao, Coloane Island, Ka Ho Lighthouse 2, 22.12923N 113.59092E, ca 34 m, 21V2019, MAC\_S17\_LLSP\_Sp.6, F. Brassard leg., Leaf litter extraction (species pool), IBBL
- 2 workers; Macao, Coloane Island, Oscar Farm hillside, 22.1131N 113.5557E, ca 83 m, 24VI2019, MAC\_S18\_LLSP\_Sp.11, F. Brassard leg., Leaf litter extraction (species pool), IBBL
- 2 workers; Macao, Coloane Island, Hamma Temple Estatua da Deusa A-ma, 22.1237N 113.5636E, ca 161 m, 8IV2019-23IV2019, MAC\_S7\_37.5\_q3\_Sp.2, F. Brassard leg., Subterranean trap, IBBL
- 2 workers; Macao, Coloane Island, Ka Ho Lighthouse 2, 22.12923N 113.59092E, ca 34 m, 21V2019-6VI2019, MAC\_S17\_12.5\_q4\_Sp.2, F. Brassard leg., Subterranean trap, IBBL

***Pheidole tumida* Eguchi, 2008**

**Material examined.** MACAO SAR, CHINA

- 1 worker; Macao, Coloane Island, Coloane Trail near C13, 22.12144N 113.56485E, ca 107 m, 18III2019, MAC\_S01\_B06\_Sp.2, F. Brassard leg., Ground bait, IBBL
- 2 workers; Macao, Coloane Island, Coloane Trail near C13, 22.12144N 113.56485E, ca 107 m, 18III2019, MAC\_S01\_B08\_Sp.1, F. Brassard leg., Ground bait, IBBL
- 2 workers; Macao, Coloane Island, Ka Ho Lighthouse 1, 22.12936N 113.59137E, ca 26 m, 20III2019, MAC\_S04\_B06\_Sp.2, F. Brassard leg., Ground bait, IBBL
- 1 worker; Macao, Coloane Island, Coloane Trail near 1-01-15, 22.11507N 113.56448E, ca 83 m, 25IV2019, MAC\_S11\_B08\_Sp.1, F. Brassard leg., Ground bait, IBBL
- 1 worker; Macao, Coloane Island, Hamma Temple Estatua da Deusa A-ma, 22.1237N 113.5636E, ca 161 m, 23IV2019-8VIII2019, MAC\_S7\_GN1\_H4\_n1, F. Brassard leg., Ground nest, IBBL
- 1 queen; Macao, Coloane Island, Hamma Temple Estatua da Deusa A-ma, 22.1237N 113.5636E, ca 161 m, 23IV2019-8VIII2019, MAC\_S7\_GN1\_H4\_n1, F. Brassard leg., Ground nest, IBBL
- 1 worker; Macao, Coloane Island, Coloane Trail near 1-01-10, 22.11652N 113.55888E, ca 102 m, 10IV2019, MAC\_S10\_LLSA\_Sp.6, F. Brassard leg., Leaf litter extraction (standardized area), IBBL

- 2 workers; Macao, Coloane Island, Coloane Trail near 1-01-15, 22.11507N 113.56448E, ca 83 m, 11IV2019, MAC\_S11\_LLSA\_Sp.10, F. Brassard leg., Leaf litter extraction (standardized area), IBBL
- 2 workers; Macao, Coloane Island, Coloane North East Hiking Trail, 22.1351N 113.57E, ca 78 m, 14V2019, MAC\_S12\_LLSA\_Sp.4, F. Brassard leg., Leaf litter extraction (standardized area), IBBL
- 1 worker; Macao, Coloane Island, Ka Ho Height Family Trail Peak near 1-09-03, 22.12835N 113.57018E, ca 140 m, 16V2019, MAC\_S14\_LLSA\_Sp.12, F. Brassard leg., Leaf litter extraction (standardized area), IBBL
- 1 worker; Macao, Coloane Island, Hillside Department of Green Areas and Gardens, 22.12747N 113.56118E, ca 69 m, 20V2019, MAC\_S16\_LLSA\_Sp.4, F. Brassard leg., Leaf litter extraction (standardized area), IBBL
- 2 workers; Macao, Coloane Island, Ka Ho Lighthouse 2, 22.12923N 113.59092E, ca 34 m, 21V2019, MAC\_S17\_LLSA\_Sp.6, F. Brassard leg., Leaf litter extraction (standardized area), IBBL
- 2 workers; Macao, Coloane Island, Oscar Farm hillside, 22.1131N 113.5557E, ca 83 m, 24VI2019, MAC\_S18\_LLSA\_Sp.9, F. Brassard leg., Leaf litter extraction (standardized area), IBBL
- 1 worker; Macao, Coloane Island, Wetland Alto de Coloane, 22.123N 113.55966E, ca 93 m, 19III2019, MAC\_S02\_LLSP\_Sp.3, F. Brassard leg., Leaf litter extraction (species pool), IBBL
- 1 worker; Macao, Coloane Island, Seoc Pai Van Park, 22.12492N 113.55663E, ca 35 m, 20III2019, MAC\_S05\_LLSP\_Sp.6, F. Brassard leg., Leaf litter extraction (species pool), IBBL
- 2 workers; Macao, Coloane Island, Coloane Trail near 1-01-15, 22.11507N 113.56448E, ca 83 m, 11IV2019, MAC\_S11\_LLSP\_Sp.7, F. Brassard leg., Leaf litter extraction (species pool), IBBL
- 2 workers; Macao, Coloane Island, Ka Ho Lighthouse 2, 22.12923N 113.59092E, ca 34 m, 21V2019, MAC\_S17\_LLSP\_Sp.8, F. Brassard leg., Leaf litter extraction (species pool), IBBL
- 2 workers; Macao, Coloane Island, Oscar Farm hillside, 22.1131N 113.5557E, ca 83 m, 24VI2019, MAC\_S18\_LLSP\_Sp.12, F. Brassard leg., Leaf litter extraction (species pool), IBBL
- 1 worker; Macao, Coloane Island, Oscar Farm hillside, 22.1131N 113.5557E, ca 83 m, 24VI2019-8VII2019, MAC\_S18\_q4\_12.5\_Sp.2, F. Brassard leg., Subterranean trap, IBBL • 1 worker; Macao, Ka Ho Reservoir, 14VII2016, CM. Leong leg. • 1 worker; Macao, Hac Sa Reservoir, 20VIII2016, CM. Leong leg. • 2 workers; Macao, Hac Sa Reservoir, 29VII2017 CM. Leong leg. • 1 worker; Macao, Siu Tam Hill, 26VIII2016, CM. Leong leg.

### ***Pheidole vulgaris* Eguchi, 2006**

#### **Material examined. MACAO SAR, CHINA**

- 2 workers; Macao, Coloane Island, Coloane North East Hiking Trail, 22.1351N 113.57E, ca 78 m, 4VI2019, MAC\_S12\_B04\_Sp.2, F. Brassard leg., Ground bait, IBBL
- 1 worker; Macao, Coloane Island, Ka Ho Lighthouse 2, 22.12923N 113.59092E, ca 34 m, 6VI2019, MAC\_S17\_B05\_Sp.2, F. Brassard leg., Ground bait, IBBL

### ***Pheidole zoceana* Santschi, 1925**

#### **Material examined. MACAO SAR, CHINA**

- 1 worker; Macao, Coloane Island, Hama Temple Estatua da Deusa A-ma, 22.1237N 113.5636E, ca 161 m, 8IV2019, MAC\_S07\_LLSA\_Sp.11, F. Brassard leg., Leaf litter extraction (standardized area), IBBL
- 2 workers; Macao, Coloane Island, Hama Temple Estatua da Deusa A-ma, 22.1237N 113.5636E, ca 161 m, 8IV2019, MAC\_S07\_LLSA\_Sp.8, F. Brassard leg., Leaf litter extraction (standardized area), IBBL
- 2 workers; Macao, Coloane Island, Coloane Trail near 1-01-15, 22.11507N 113.56448E, ca 83 m, 11IV2019, MAC\_S11\_LLSA\_Sp.6, F. Brassard leg., Leaf litter extraction (standardized area), IBBL

- 2 workers; Macao, Coloane Island, Ka Ho Lighthouse 2, 22.12923N 113.59092E, ca 34 m, 21V2019, MAC\_S17\_LLSA\_Sp.1, F. Brassard leg., Leaf litter extraction (standardized area), IBBL
- 1 worker; Macao, Coloane Island, Hama Temple Estatua da Deusa A-ma, 22.1237N 113.5636E, ca 161 m, 8IV2019, MAC\_S07\_LLSP\_Sp.5, F. Brassard leg., Leaf litter extraction (species pool), IBBL
- 1 worker; Macao, Coloane Island, Ka Ho Height Family Trail Peak near 1-09-03, 22.12835N 113.57018E, ca 140 m, 16V2019, MAC\_S14\_LLSP\_Sp.2, F. Brassard leg., Leaf litter extraction (species pool), IBBL

***Pheidole* nr. *ryukyuensis* name Ogata, 1982**

**Material examined.** MACAO SAR, CHINA • 2 workers; Macao, Coloane Island, Cotai Ecological Zone II, 22.1418N 113.5519E, ca 2 m, 26VI2019-11VII2019, MAC\_S20\_12.5\_q4\_Sp.2, F. Brassard leg., Subterranean trap, IBBL

***Recurvidris recurvispinosa* Forel, 1890**

**Material examined.** MACAO SAR, CHINA

- 2 workers; Macao, Coloane Island, Coloane Trail near 1-01-15, 22.11507N 113.56448E, ca 83 m, 25IV2019, MAC\_S11\_B01\_Sp.1, F. Brassard leg., Ground bait, IBBL
- 1 worker; Macao, Coloane Island, Ka Ho Lighthouse 1, 22.12936N 113.59137E, ca 26 m, 20III2019, MAC\_S04\_LLSA\_Sp.3, F. Brassard leg., Leaf litter extraction (standardized area), IBBL
- 1 worker; Macao, Coloane Island, Hama Temple Estatua da Deusa A-ma, 22.1237N 113.5636E, ca 161 m, 8IV2019, MAC\_S07\_LLSA\_Sp.5, F. Brassard leg., Leaf litter extraction (standardized area), IBBL
- 1 worker; Macao, Coloane Island, Coloane North East Hiking Trail, 22.1351N 113.57E, ca 78 m, 14V2019, MAC\_S12\_LLSA\_Sp.9, F. Brassard leg., Leaf litter extraction (standardized area), IBBL
- 1 worker; Macao, Coloane Island, Ka Ho Lighthouse 2, 22.12923N 113.59092E, ca 34 m, 21V2019, MAC\_S17\_LLSP\_Sp.7, F. Brassard leg., Leaf litter extraction (species pool), IBBL
- 1 worker; Macao, Coloane Island, Oscar Farm hillside, 22.1131N 113.5557E, ca 83 m, 24VI2019, MAC\_S18\_LLSP\_Sp.10, F. Brassard leg., Leaf litter extraction (species pool), IBBL • 1 worker; Macao, Siu Tam Hill, 26VIII2016, CM. Leong leg.

***Rotastruma stenoceps* Bolton, 1991**

**Material examined.** MACAO SAR, CHINA

- 2 workers; Macao, Coloane Island, Morro de Hac Sa Family Trail near 1-07-08, 22.1144N 113.56988E, ca 53 m, 17V2019, MAC\_S15\_LLSA\_Sp.6, F. Brassard leg., Leaf litter extraction (standardized area), IBBL
- 1 queen; Macao, Coloane Island, Morro de Hac Sa Family Trail near 1-07-08, 22.1144N 113.56988E, ca 53 m, 17V2019, MAC\_S15\_LLSA\_Sp.6, F. Brassard leg., Leaf litter extraction (standardized area), IBBL

***Solenopsis geminata* Fabricius, 1804**

**Material examined.** MACAO SAR, CHINA • 1 alate queen; Macao, Hac Sa Reservoir, 7VIII2015, CM. Leong leg. • 2 males; Macao, Hac Sa Reservoir, 7VIII2015, CM. Leong leg. • 1 worker; Macao, Hac Sa Reservoir, 21VIII2015, CM. Leong leg.

***Solenopsis invicta* Buren, 1972**



#### **Material examined. MACAO SAR, CHINA**

- 2 workers; Macao, Coloane Island, Ka Ho Reservoir Hillside, 22.13328N 113.57437E, ca 85 m, 24IV2019, MAC\_S09\_B05\_Sp.1, F. Brassard leg., Ground bait, IBBL
- 2 workers; Macao, Coloane Island, Ka Ho Reservoir Hillside, 22.13328N 113.57437E, ca 85 m, 24IV2019, MAC\_S09\_B10\_Sp.1, F. Brassard leg., Ground bait, IBBL
- 1 worker; Macao, Coloane Island, Ka Ho Reservoir Hillside, 22.13328N 113.57437E, ca 85 m, 9IV2019, MAC\_S09\_LLSP\_Sp.5, F. Brassard leg., Leaf litter extraction (species pool), IBBL • 1 worker; Macao, Siu Tam Hill, 5VIII2015, CM. Leong leg. • 1 worker; Macao, Tai Tam Hill, 5VIII2015, CM. Leong leg. • 1 worker; Macao, Hac Sa Reservoir, 8VIII2015, CM. Leong leg. • 1 worker; Macao, Ka Ho Reservoir, 14VII2016, CM. Leong leg. • 1 worker; Macao, Ecological Protection Area I & II, 12I2017, CM. Leong leg.

#### ***Solenopsis jacoti* Wheeler, 1923**

#### **Material examined. MACAO SAR, CHINA**

- 2 workers; Macao, Coloane Island, Ka Ho Lighthouse 1, 22.12936N 113.59137E, ca 26 m, 20III2019, MAC\_S04\_B02\_Sp.1, F. Brassard leg., Ground bait, IBBL
- 2 workers; Macao, Coloane Island, Ka Ho Lighthouse 1, 22.12936N 113.59137E, ca 26 m, 20III2019, MAC\_S04\_LLSA\_Sp.4, F. Brassard leg., Leaf litter extraction (standardized area), IBBL
- 2 workers; Macao, Coloane Island, Ka Ho Reservoir Freshwater Wetland, 22.13478N 113.57333E, ca 54 m, 9IV2019, MAC\_S08\_LLSA\_Sp.2, F. Brassard leg., Leaf litter extraction (standardized area), IBBL
- 2 workers; Macao, Coloane Island, Coloane North East Hiking Trail, 22.1351N 113.57E, ca 78 m, 14V2019, MAC\_S12\_LLSA\_Sp.8, F. Brassard leg., Leaf litter extraction (standardized area), IBBL
- 2 workers; Macao, Coloane Island, Macau Golf & Country Club, 22.12481N 113.57902E, ca 19 m, 15V2019, MAC\_S13\_LLSA\_Sp.2, F. Brassard leg., Leaf litter extraction (standardized area), IBBL
- 1 worker; Macao, Coloane Island, Ka Ho Height Family Trail Peak near 1-09-03, 22.12835N 113.57018E, ca 140 m, 16V2019, MAC\_S14\_LLSA\_Sp.8, F. Brassard leg., Leaf litter extraction (standardized area), IBBL
- 1 worker; Macao, Coloane Island, Hillside Department of Green Areas and Gardens, 22.12747N 113.56118E, ca 69 m, 20V2019, MAC\_S16\_LLSA\_Sp.10, F. Brassard leg., Leaf litter extraction (standardized area), IBBL
- 1 queen; Macao, Coloane Island, Cotai Ecological Zone II, 22.1418N 113.5519E, ca 2 m, 26VI2019, MAC\_S20\_LLSA\_Sp.9, F. Brassard leg., Leaf litter extraction (standardized area), IBBL
- 2 workers; Macao, Coloane Island, Cotai Ecological Zone II, 22.1418N 113.5519E, ca 2 m, 26VI2019, MAC\_S20\_LLSA\_Sp.9, F. Brassard leg., Leaf litter extraction (standardized area), IBBL
- 2 workers; Macao, Coloane Island, Ka Ho Lighthouse 1, 22.12936N 113.59137E, ca 26 m, 20III2019, MAC\_S04\_LLSP\_Sp.2, F. Brassard leg., Leaf litter extraction (species pool), IBBL
- 2 workers; Macao, Coloane Island, Coloane Trail near 1-01-15, 22.11507N 113.56448E, ca 83 m, 11IV2019, MAC\_S11\_LLSP\_Sp.3, F. Brassard leg., Leaf litter extraction (species pool), IBBL
- 1 worker; Macao, Coloane Island, Ka Ho Height Family Trail Peak near 1-09-03, 22.12835N 113.57018E, ca 140 m, 16V2019, MAC\_S14\_LLSP\_Sp.13, F. Brassard leg., Leaf litter extraction (species pool), IBBL
- 2 workers; Macao, Coloane Island, Cotai Ecological Zone II, 22.1418N 113.5519E, ca 2 m, 26VI2019, MAC\_S20\_LLSP\_Sp.9, F. Brassard leg., Leaf litter extraction (species pool), IBBL
- 2 workers; Macao, Coloane Island, Hama Temple Estatua da Deusa A-ma, 22.1237N 113.5636E, ca 161 m, 8IV2019-23IV2019, MAC\_S7\_25\_q1\_Sp.1, F. Brassard leg., Subterranean trap, IBBL
- 1 worker; Macao, Coloane Island, Ka Ho Reservoir Freshwater Wetland, 22.13478N 113.57333E, ca 54 m, 9IV2019-24IV2019, MAC\_S8\_25\_q1\_Sp.2, F. Brassard leg., Subterranean trap, IBBL

- 1 worker; Macao, Coloane Island, Coloane Trail near 1-01-10, 22.11652N 113.55888E, ca 102 m, 10IV2019-25IV2019, MAC\_S10\_12.5\_q1\_Sp.1, F. Brassard leg., Subterranean trap, IBBL
- 2 workers; Macao, Coloane Island, Coloane Trail near 1-01-15, 22.11507N 113.56448E, ca 83 m, 11IV2019-25IV2019, MAC\_S11\_25\_q4\_Sp.2, F. Brassard leg., Subterranean trap, IBBL
- 2 workers; Macao, Coloane Island, Coloane North East Hiking Trail, 22.1351N 113.57E, ca 78 m, 14V2019-4VI2019, MAC\_S12\_37.5\_q3\_Sp.2, F. Brassard leg., Subterranean trap, IBBL
- 2 workers; Macao, Coloane Island, Coloane North East Hiking Trail, 22.1351N 113.57E, ca 78 m, 14V2019-4VI2019, MAC\_S12\_50\_q4\_Sp.3, F. Brassard leg., Subterranean trap, IBBL
- 1 worker; Macao, Coloane Island, Ka Ho Height Family Trail Peak near 1-09-03, 22.12835N 113.57018E, ca 140 m, 16V2019-4VI2019, MAC\_S14\_12.5\_q3\_Sp.2, F. Brassard leg., Subterranean trap, IBBL
- 2 workers; Macao, Coloane Island, Ka Ho Height Family Trail Peak near 1-09-03, 22.12835N 113.57018E, ca 140 m, 16V2019-4VI2019, MAC\_S14\_25\_q4\_Sp.2, F. Brassard leg., Subterranean trap, IBBL
- 1 worker; Macao, Coloane Island, Ka Ho Height Family Trail Peak near 1-09-03, 22.12835N 113.57018E, ca 140 m, 16V2019-4VI2019, MAC\_S14\_50\_q4\_Sp.1, F. Brassard leg., Subterranean trap, IBBL
- 1 worker; Macao, Coloane Island, Morro de Hac Sa Family Trail near 1-07-08, 22.1144N 113.56988E, ca 53 m, 17V2019-5VI2019, MAC\_S15\_25\_q2\_Sp.3, F. Brassard leg., Subterranean trap, IBBL
- 1 worker; Macao, Coloane Island, Morro de Hac Sa Family Trail near 1-07-08, 22.1144N 113.56988E, ca 53 m, 17V2019-5VI2019, MAC\_S15\_12.5\_q4\_Sp.3, F. Brassard leg., Subterranean trap, IBBL
- 1 worker; Macao, Coloane Island, Ka Ho Lighthouse 2, 22.12923N 113.59092E, ca 34 m, 21V2019-6VI2019, MAC\_S17\_25\_q4\_Sp.2, F. Brassard leg., Subterranean trap, IBBL
- 1 worker; Macao, Coloane Island, Oscar Farm hillside, 22.1131N 113.5557E, ca 83 m, 24VI2019-8VII2019, MAC\_S18\_12.5\_q1\_Sp.1, F. Brassard leg., Subterranean trap, IBBL
- 2 workers; Macao, Coloane Island, Oscar Farm hillside, 22.1131N 113.5557E, ca 83 m, 24VI2019-8VII2019, MAC\_S18\_q2\_12.5\_Sp.3, F. Brassard leg., Subterranean trap, IBBL
- 2 workers; Macao, Coloane Island, Cotai Ecological Zone II, 22.1418N 113.5519E, ca 2 m, 26VI2019-11VII2019, MAC\_S20\_q2\_12.5\_02\_Sp.2, F. Brassard leg., Subterranean trap, IBBL
- 2 workers; Macao, Coloane Island, Cotai Ecological Zone II, 22.1418N 113.5519E, ca 2 m, 26VI2019-11VII2019, MAC\_S20\_q2\_25\_01\_Sp.1, F. Brassard leg., Subterranean trap, IBBL
- 1 worker; Macao, Coloane Island, Cotai Ecological Zone II, 22.1418N 113.5519E, ca 2 m, 26VI2019-11VII2019, MAC\_S20\_q2\_25\_02\_Sp.1, F. Brassard leg., Subterranean trap, IBBL
- 2 workers; Macao, Coloane Island, Cotai Ecological Zone II, 22.1418N 113.5519E, ca 2 m, 26VI2019-11VII2019, MAC\_S20\_12.5\_q4\_Sp.3, F. Brassard leg., Subterranean trap, IBBL
- 1 worker; Macao, Coloane Island, Coloane Trail near C3, 22.1217N 113.556E, ca 105 m, 27VI2019-10VII2019, MAC\_S21\_q4\_12.5\_Sp.1, F. Brassard leg., Subterranean trap, IBBL
- 1 worker; Macao, Coloane Island, Hama Temple Estatua da Deusa A-ma, 22.1237N 113.5636E, ca 161 m, 8IV2019, MAC\_S07\_LLSP\_Sp.3, F. Brassard leg., Leaf litter extraction (species pool), IBBL
- 1 worker; Macao, Coloane Island, Morro de Hac Sa Family Trail near 1-07-08, 22.1144N 113.56988E, ca 53 m, 17V2019, MAC\_S15\_LLSP\_Sp.3, F. Brassard leg., Leaf litter extraction (species pool), IBBL

### ***Strumigenys elegantula* Terayama & Kubota, 1989**

**Material examined.** MACAO SAR, CHINA • 28 Workers; Macao, Coloane Island, Ka Ho; 22.1294N 113.5914E, ca 30 m; 20 Mar. 2019; F. Brassard leg.; Winkler; MAC\_S04\_LLSP\_Sp.9; IBBL. • 1 Worker; Macao, Coloane Island, Ka Ho; 22.1294N 113.5914E, ca 30 m; 20 Mar. 2019; F. Brassard leg.; Winkler; MAC\_S04\_LLSP\_Sp.1; IBBL. • 1 Worker; Macao, Coloane Island, Ka Ho Family Trail Peak; 22.1284N 113.5702E, ca 180 m; 16 May 2019; F. Brassard leg.; Winkler; MAC\_S14\_LLSP\_Sp.1; IBBL. • 1 Worker; Macao, Coloane Island, Ka Ho Family Trail Peak; 22.1284N 113.5702E, ca 180 m; 16 May 2019; F. Brassard leg.; Winkler; MAC\_S14\_LLSP\_Sp.3; IBBL. • 1 Worker; Macao, Coloane Island, Ka Ho Height Family trail

peak near 1-09-03; 22.1284N 113.5702E, ca 140m; 16 May 2019; F. Brassard leg.; Ground bait; MAC\_S14\_B06\_Sp.1; IBBL. • 1 Queen; Macao, Coloane Island, Ka Ho; 22.1294N 113.5914E, ca 30 m; 20 Mar. 2019; F. Brassard leg.; Winkler; MAC\_S04\_LLSP\_Sp.9; IBBL.

***Strumigenys emmae* Emery, 1890**

**Material examined.** MACAO SAR, CHINA • 3 Workers; Macao, Coloane Island, Caesars Golf Macau, 22.1351N 113.5611E, ca 10 m, 25 Jun. 2019, MAC\_S19\_LLSA\_Sp.1, F. Brassard leg., Winkler; IBBL. • 2 Workers; Macao, Coloane Island, Cotai Ecological Zone II; 22.1418N 113.5519E, ca 0 m; 26 Jun. 2019; F. Brassard leg.; Winkler; MAC\_S20\_LLSA\_Sp.6; IBBL. • 3 Workers; Macao, Coloane Island, Cotai Ecological Zone II; 22.1418N 113.5519E, ca 0 m; 26 Jun. 2019; F. Brassard leg.; Winkler; MAC\_S20\_LLSP\_Sp.7; IBBL. • 1 Worker; Macao, Taipa Island, Siu Tam Hill; 22.1608N 113.5466E, ca 80 m; 15 Aug. 2018; C.M. Leong leg.; CML-FW-15viii2018; IBBL. • 1 Worker; Macao, Macao Peninsula, Guia Hill; 22.1983N 113.5511E, ca 60 m; 18 Aug. 2018; C.M. Leong leg.; IBBL. • 1 Queen; Macao, Coloane Island, Caesars Golf Macau; 22.1351N 113.5611E, ca 10 m; 25 Jun. 2019; F. Brassard leg.; Winkler; MAC\_S19\_LLSA\_Sp.1; IBBL]. • 1 Queen; Macao, Taipa Island, Siu Tam Hill; 22.1608N 113.5466E, ca 80 m; 26 Aug. 2016; C.M. Leong leg.; IBBL. • 1 worker; Macao, Tai Tam Hill, 2VIII2017, B. Guénard leg.

***Strumigenys exilirhina* Bolton, 2000**

**Material examined.** MACAO SAR, CHINA MACAO SAR, CHINA • 3 Workers; Macao, Coloane Island, Coloane Park; 22.1214N 113.5649E, ca 110 m; 18 Mar. 2019; F. Brassard leg.; Winkler; MAC\_S01\_LLSA\_Sp.3; IBBL. • 2 Workers; Macao, Coloane Island, Hillside of Department of Green Areas and Gardens; 22.1275N 113.5612E, ca 70 m; 20 May 2019; F. Brassard leg.; Winkler; MAC\_S16\_LLSA\_Sp.9; IBBL. • 1 Worker; Macao, Coloane Island, Wetland Alto de Coloane; 22.1230N 113.5597E, ca 90 m; 19 Apr. 2019; F. Brassard leg.; Winkler; MAC\_S02\_LLSA\_Sp.7; IBBL. • 1 Worker; Macao, Coloane Island, Seoc Pai Van Park; 22.1249N 113.5566E, ca 40 m; 20 Mar. 2019; F. Brassard leg.; Winkler; MAC\_S05\_LLSP\_Sp.7; IBBL. • 4 Workers; Macao, Coloane Island, Hac Sa Reservoir Family trail near 1-05-12; 22.1237N 113.5684E, ca 90 m; 8 Apr. 2019; F. Brassard leg.; Winkler; MAC\_S06\_LLSA\_Sp.3; IBBL. • 7 Workers; Macao, Coloane Island, Hac Sa Reservoir Family trail near 1-05-12; 22.1237N 113.5684E, ca 90 m; 8 Apr. 2019; F. Brassard leg.; Winkler; MAC\_S06\_LLSP\_Sp.4; IBBL. • 11 Workers; Macao, Coloane Island, Coloane trail near 1-01-10; 22.1165N 113.5589E, ca 100 m; 10 Apr. 2019; F. Brassard leg.; Winkler; MAC\_S10\_LLSA\_Sp.4; IBBL. • 1 Worker; Macao, Coloane Island, Coloane trail near 1-01-15; 22.1151N 113.5645E, ca 80 m; 11 Apr. 2019; F. Brassard leg.; Winkler; MAC\_S11\_LLSA\_Sp.4; IBBL. • 2 Workers; Macao, Coloane Island, Ka Ho height family trail peak near 1-09-03; 22.1284N 113.5702E, ca 140 m; 16 May 2019; F. Brassard leg.; Winkler;

MAC\_S14\_LLSP\_Sp.3; IBBL. • 2 Workers; Macao, Coloane Island, Oscar farm hillside; 22.1131N 113.5557E, ca 80 m; 24 Jun. 2019; F. Brassard leg.; Winkler; MAC\_S18\_LLSA\_Sp.11; IBBL. • 1 Worker; Macao, Macao Peninsula, Mongha Hill; 22.2085N 113.5476E; 18 Feb. 2018; C.M. Leong leg.; CML-FW-18ii2018. • 1 Worker; Macao, Coloane Island, Ka Ho Reservoir; 22.1341N 113.5786E; 27 Feb. 2018; C.M. Leong leg.; Winkler; CML-FW-27ii2018; IBBL. • 2 Workers; Macao, Coloane Island, Ka Ho Reservoir; 14 Aug. 2018; C.M. Leong leg.; IBBL]. • 1 Worker; Macao, Coloane Island, Hac Sa Reservoir; 22.1264N 113.5733E; C.M. Leong leg.; IBBL. • 1 Queen; Macao, Coloane Island, Ka Ho Reservoir; 22.1608N 113.5466E; 15 Jul. 2018; C.M. Leong leg.; Winkler; CML-FW-15vii2018; IBBL. • 1 Queen; Macao, Coloane Island, Hillside of Department of Green Areas and Gardens; 22.1275N 113.5612E, ca 70 m; 20 May 2019; F. Brassard leg.; Winkler; MAC\_S06\_LLSA\_Sp.3; IBBL. • 2 Queens; Macao, Coloane Island, Coloane trail near 1-01-10; 22.1165N 113.5589E, ca 100 m; 10 Apr. 2019; F. Brassard leg.; Winkler; MAC\_S10\_LLSP\_Sp.2; IBBL. • 1 Queen; Macao, Coloane Island, Hillside of Department of Green Areas and Gardens; 22.1275N 113.5612E, ca 70 m; 20 May 2019; F. Brassard leg.; Winkler; MAC\_S16\_LLSA\_Sp.9; IBBL.

***Strumigenys feae* Emery, 1895**

**Material examined.** MACAO SAR, CHINA MACAO SAR, CHINA • 1 Worker; Macao, Coloane Island, Coastal Trail; 22.1144N 113.5699E, ca 110 m; 17 May 2019; F. Brassard leg.; Winkler; MAC\_S15\_LLSP\_Sp.8; IBBL.

***Strumigenys membranifera* Emery, 1869**

**Material examined.** MACAO SAR, CHINA • 1 Worker; Macao, Coloane Island, Coloane Trail (Near C3 information point); 22.1217N 113.5560E, ca 110 m; 27 Jun. 2019; F. Brassard leg.; Winkler; MAC\_S21\_LLSP\_Sp.2; IBBL. • 2 Workers; Macao, Coloane Island, Morro de Hac Sa family trail near 1-07-08; 22.1144N 113.5699E, ca 50 m; 5 Jun.-11 Sep. 2019; F. Brassard leg.; Ground nest; MAC\_S15\_GN3\_H3\_n1; IBBL.

***Strumigenys minutula* Terayama & Kubota, 1989**

**Material examined.** MACAO SAR, CHINA MACAO SAR, CHINA • 22 Workers; Macao, Coloane Island, Hac Sa Reservoir family trail near 1-05-12; 22.1237N 113.5684E, ca 90 m; 8 April 2019; F. Brassard leg.; Winkler; MAC\_S06\_LLSA\_Sp.6; IBBL. • 1 Worker; Macao, Coloane Island, Coloane trail near 1-01-10; 22.1165N 113.5589E, ca 100 m; 10 April 2019; F. Brassard leg.; Winkler; MAC\_S10\_LLSA\_Sp.2; IBBL. • 2 Workers; Macao, Coloane Island, Ka Ho Family Trail Peak; 22.1284N 113.5702E, ca 180 m; 16 May 2019; F. Brassard leg.; Winkler; MAC\_S14\_LLSP\_Sp.4; IBBL. • 135 Workers; Macao, Coloane Island, Coloane Trail (Near 1-01-10 distance post); 22.1351N 113.5700E, ca 80 m; 16 May 2019; F. Brassard leg.; Ground nest; MAC\_S11\_GN3\_H4\_n1; IBBL. • 1 Worker; Macao, Coloane Island, Ka Ho Family Trail Peak; 22.1284N 113.5702E, ca 180 m; 16 May 2019; F. Brassard leg.; Winkler; MAC\_S14\_LLSA\_Sp.11; IBBL]. • 1 Worker; Macao, Coloane Island, Ka Ho Lighthouse 2; 22.1292N 113.5909E, ca 30 m; 21 May 2019; F. Brassard leg.;

Winkler; MAC\_S17\_LLSA\_Sp.10; IBBL. • 13 Workers; Macao, Coloane Island, Ka Ho Lighthouse 2; 22.1292N 113.5909E, ca 30 m; 21 May 2019; F. Brassard leg.; Winkler; MAC\_S17\_LLSP\_Sp.4; IBBL. • 1 Worker; Macao, Coloane Island, Caesars Golf Macau; 22.1351N 113.5612E, ca 10 m; 25 June 2019; F. Brassard leg.; Winkler; MAC\_S19\_LLSP\_Sp.4; IBBL. • 1 Worker; Macao, Taipa Island, Siu Tam Hill; 22.1603N 113.5471E; 22 July 2018; C.M. Leong leg.; IBBL. • 1 Worker; Macao, Coloane Island, Ka Ho Reservoir; 22.1251N, 113.5692E; 20 July 2016; C.M. Leong leg.; IBBL. • 1 Worker; Macao, Coloane Island, Ka Ho Reservoir; 22.1251N, 113.5691E; 20 August 2016; C.M. Leong leg.; IBBL. • 1 Worker; Macao, Coloane Island, Hac Sa Reservoir; 20 August 2016; C.M. Leong leg.; IBBL. • 2 Queens; Macao, Coloane Island, Coloane Trail (Near 1-01-10 distance post); 22.1351 N 113.5700E, ca 80 m; 16 May 2019; F. Brassard leg.; MAC\_S11\_GN3\_H4\_n1; Ground nest; IBBL.

***Strumigenys nepalensis* Baroni Urbani & De Andrade, 1994**

**Material examined.** MACAO SAR, CHINA • 3 Workers; Macao, Coloane Island, Caesars Golf Macau; 22.1351N 113.5611E, ca 10 m; 25 June 2019; F. Brassard leg.; Winkler; MAC\_S19\_LLSP\_Sp.3; IBBL. • 3 Worker; Macao, Coloane Island, Ka Ho Reservoir hillside; 22.1333N 113.5744E, ca 90 m; 9 April 2019; F. Brassard leg.; Winkler MAC\_S09\_LLSA\_Sp.5; IBBL. • 21 Workers; Macao, Coloane Island, Caesars Golf Macau; 22.1351N 113.5612E, ca 10 m; 25 June 2019; F. Brassard leg.; Winkler; MAC\_S19\_LLSA\_Sp.2; IBBL. • 19 Workers; Macao, Coloane Island, Cotai Ecological Zone II; 22.1418N 113.5519E, ca 0 m; 26 June 2019; F. Brassard leg.; MAC\_S20\_LLSA\_Sp.7; Winkler; IBBL. • 1 Worker; Macao, Coloane Island, Cotai Ecological Zone II; 22.1418N 113.5519E; ca 0 m; 26 June 2019; F. Brassard leg.; Winkler; MAC\_S20\_LLSP\_Sp.8; IBBL. Worker, Macao, Hac Sa Reservoir, 20 August 2016, C.M. Leong leg., [IBBL], ( $n = 1$ ). • 4 Queens; Macao, Coloane Island, Caesars Golf Macau; 22.1351N 113.5612E, ca 10 m; 25 June 2019; F. Brassard leg.; Winkler MAC\_S19\_LLSA\_Sp.2; IBBL. • 3 Queens; Macao, Coloane Island, Caesars Golf Macau; 22.1351N 113.5611E, ca 10 m; 25 June 2019; F. Brassard leg.; Winkler; MAC\_S19\_LLSP\_Sp.3; IBBL. • 3 Queens; Macao, Coloane Island, Cotai Ecological Zone II; 22.1418N 113.5519E, ca 0 m; 26 June 2019; F. Brassard leg.; Winkler; MAC\_S20\_LLSA\_Sp.7; IBBL. • 3 Queens; Macao, Coloane Island, Cotai Ecological Zone II; 22.1418N 113.5519E, ca 0 m; 26 June 2019; F. Brassard leg.; Winkler; MAC\_S20\_LLSP\_Sp.8; IBBL.

***Strumigenys sauteri* Forel, 1912**

**Material examined.** MACAO SAR, CHINA • 1 Worker; Macao, Coloane Island, Ka Ho; 22.1936N 113.5914E, ca 30 m; 20 March 2019; F. Brassard leg.; Winkler; MAC\_S04\_LLSA\_Sp.2; IBBL. • 5 Workers; Macao, Coloane Island, Coloane trail near 1-01-15; 22.1151N 113.5645E, ca 80 m; 11 April 2019; F. Brassard leg.; Winkler; MAC\_S11\_LLSP\_Sp.4; IBBL. • 3 Workers; Macao, Coloane Island, Oscar Farm hillside; 22.1131N 113.5557E, ca 80 m; 24 June 2019; F. Brassard leg.; Winkler; MAC\_S18\_LLSA\_Sp.10; IBBL. • 1 Worker; Macao, Taipa Island, Tai Tam Hill; 22.1578N 113.5679E; 26 July, 2018; C.M. Leong leg.; IBBL. • 1 Queen; Macao, Coloane Island, Coloane Trail (Near 1-01-15 distance post); 22.1151N 113.5644E, ca 80 m; 11 April 2019; F. Brassard leg.; Winkler; MAC\_S11\_LLSP\_Sp.4; IBBL.

***Strumigenys subterranea* Brassard, Leong & Guénard, 2020**

**Material examined.** MACAO SAR, CHINA • 1 worker; Macao, Coloane Island, Coloane North East Hiking Trail, 22.1351N 113.57E, ca 78 m, 14V2019-4VI2019, MAC\_S12\_12.5\_q4\_Sp.2, F. Brassard leg., Subterranean trap, IBBL

***Syllophopsis* sp. 1 BMW**

**Material examined.** MACAO SAR, CHINA • 2 workers; Macao, Coloane Island, Cotai Ecological Zone II, 22.1418N 113.5519E, ca 2 m, 26VI2019, MAC\_S20\_LLSP\_Sp.10, F. Brassard leg., Leaf litter extraction (species pool), IBBL

***Syllophopsis* sp. 2 BMW**

**Material examined.** MACAO SAR, CHINA • 1 worker; Macao, Coloane Island, Oscar Farm hillside, 22.1131N 113.5557E, ca 83 m, 24VI2019-8VII2019, MAC\_S18\_q3\_12.5\_Sp.4, F. Brassard leg., Subterranean trap, IBBL • 1 worker; Macao, Coloane Island, Hamma Temple Estatua da Deusa A-ma, 22.1237N 113.5636E, ca 161 m, 8IV2019, MAC\_S07\_LLSA\_Sp.7, F. Brassard leg., Leaf litter extraction (standardized area), IBBL

***Syllophopsis* nr. *cryptobia***

**Material examined.** MACAO SAR, CHINA • 1 worker; Macao, Coloane Island, Coloane North East Hiking Trail, 22.1351N 113.57E, ca 78 m, 14V2019-4VI2019, MAC\_S12\_37.5\_q3\_Sp.3, F. Brassard leg., Subterranean trap, IBBL

***Syllophopsis* sp. mo01 nr. *sechellensis* Emery, 1894**

**Material examined.** MACAO SAR, CHINA

- 2 workers; Macao, Coloane Island, Seoc Pai Van Park, 22.12492N 113.55663E, ca 35 m, 20III2019, MAC\_S05\_LLSA\_Sp.2, F. Brassard leg., Leaf litter extraction (standardized area), IBBL
- 1 worker; Macao, Coloane Island, Macau Golf & Country Club, 22.12481N 113.57902E, ca 19 m, 15V2019, MAC\_S13\_LLSA\_Sp.3, F. Brassard leg., Leaf litter extraction (standardized area), IBBL
- 2 workers; Macao, Coloane Island, Ka Ho Lighthouse 2, 22.12923N 113.59092E, ca 34 m, 21V2019, MAC\_S17\_LLSA\_Sp.12, F. Brassard leg., Leaf litter extraction (standardized area), IBBL
- 1 worker; Macao, Coloane Island, Wetland Alto de Coloane, 22.123N 113.55966E, ca 93 m, 19III2019, MAC\_S02\_LLSP\_Sp.7, F. Brassard leg., Leaf litter extraction (species pool), IBBL
- 1 worker; Macao, Coloane Island, Macau Golf & Country Club, 22.12481N 113.57902E, ca 19 m, 15V2019, MAC\_S13\_LLSP\_Sp.3, F. Brassard leg., Leaf litter extraction (species pool), IBBL
- 1 worker; Macao, Coloane Island, Ka Ho Height Family Trail Peak near 1-09-03, 22.12835N 113.57018E, ca 140 m, 16V2019, MAC\_S14\_LLSP\_Sp.14, F. Brassard leg., Leaf litter extraction (species pool), IBBL
- 2 workers; Macao, Coloane Island, Ka Ho Lighthouse 2, 22.12923N 113.59092E, ca 34 m, 21V2019, MAC\_S17\_LLSP\_Sp.9, F. Brassard leg., Leaf litter extraction (species pool), IBBL
- 1 worker; Macao, Coloane Island, Caesar Golf Center, 22.13505N 113.56115E, ca 7 m, 25VI2019-10VII2019, MAC\_S19\_q3\_GL\_03\_Sp.1, F. Brassard leg., Subterranean trap, IBBL • 2 workers; Macao, Ka Ho Reservoir, 14VII2016, CM. Leong leg. • 1 worker; Macao, Hac Sa Reservoir, 20VIII2016, CM. Leong

leg. • 1 worker; Macao, Ka Ho Reservoir, 23VIII2016, CM. Leong leg. • 1 worker; Macao, Siu Tam Hill, 26VIII2016, CM. Leong leg.

***Tetramorium bicarinatum* Nylander, 1846**

**Material examined.** MACAO SAR, CHINA

- 2 workers; Macao, Coloane Island, Coloane Trail near 1-01-15, 22.11507N 113.56448E, ca 83 m, 29VIII2019, MAC\_S11\_T1\_2m\_Sp.1, F. Brassard leg., Arboreal bait, IBBL
- 1 worker; Macao, Coloane Island, Caesar Golf Center, 22.13505N 113.56115E, ca 7 m, 25VI2019, MAC\_S19\_LLSP\_Sp.9, F. Brassard leg., Leaf litter extraction (species pool), IBBL
- 1 worker; Macao, Guia Hill, 24VII2015, CM. Leong Leg. • 1 worker; Macao, Tam Kong Temple, 30VII2015, CM. Leong Leg. • 1 worker; Macao, CM. Leong Leg. • 1 worker; Macao, Guia Hill, 5VIII2015, CM. Leong Leg. • 1 worker; Macao, Hac Sa Reservoir, 3X2015, CY. Lei Leg. • 1 worker; Macao, Guia Hill, 18VIII2016, CM. Leong Leg. • 1 worker; Macao, Hac Sa Reservoir, 20VIII2016, CM. Leong Leg. • 1 worker; Macao, Ka Ho Reservoir, 20VIII2016, MG. Oxalá Leg. • 2 workers; Macao, Guia Hill, 27VIII2016, CM. Leong Leg. • 1 worker; Macao, Ecological Protection Area I & II, 12I2017, CM. Leong Leg.

***Tetramorium indicum* Forel, 1913**

**Material examined.** MACAO SAR, CHINA

- 1 worker; Macao, Coloane Island, Ka Ho Reservoir Freshwater Wetland, 22.13478N 113.57333E, ca 54 m, 27VIII2019, MAC\_S8\_T3\_1m\_Sp.1, F. Brassard leg., Arboreal bait, IBBL
- 2 workers; Macao, Coloane Island, Morro de Hac Sa Family Trail near 1-07-08, 22.1144N 113.56988E, ca 53 m, 12IX2019, MAC\_S15\_T3\_3m\_Sp.1, F. Brassard leg., Arboreal bait, IBBL

***Tetramorium insolens* Smith, 1861**

**Material examined.** MACAO SAR, CHINA • 1 worker; Macao, Coloane Island, Ka Ho Lighthouse 2, 22.12923N 113.59092E, ca 34 m, 21V2019, MAC\_S17\_LLSA\_Sp.3, F. Brassard leg., Leaf litter extraction (standardized area), IBBL

***Tetramorium kraepelini* Forel, 1905**

**Material examined.** MACAO SAR, CHINA

- 2 workers; Macao, Coloane Island, Coloane Trail near C13, 22.12144N 113.56485E, ca 107 m, 18III2019, MAC\_S01\_B06\_Sp.3, F. Brassard leg., Ground bait, IBBL
- 2 workers; Macao, Coloane Island, Wetland Alto de Coloane, 22.123N 113.55966E, ca 93 m, 19III2019, MAC\_S02\_B02\_Sp.1, F. Brassard leg., Ground bait, IBBL
- 1 worker; Macao, Coloane Island, Hac Sa Reservoir near C21, 22.12659N 113.57272E, ca 69 m, 19III2019, MAC\_S03\_B06\_Sp.1, F. Brassard leg., Ground bait, IBBL
- 2 workers; Macao, Coloane Island, Hac Sa Reservoir near C21, 22.12659N 113.57272E, ca 69 m, 19III2019, MAC\_S03\_B08\_Sp.1, F. Brassard leg., Ground bait, IBBL
- 2 workers; Macao, Coloane Island, Seoc Pai Van Park, 22.12492N 113.55663E, ca 35 m, 20III2019, MAC\_S05\_B07\_Sp.2, F. Brassard leg., Ground bait, IBBL

- 2 workers; Macao, Coloane Island, Hac Sa Reservoir Family Trail near 1-05-12, 22.1237N 113.5684E, ca 91 m, 23IV2019, MAC\_S06\_B09\_Sp.1, F. Brassard leg., Ground bait, IBBL
- 2 workers; Macao, Coloane Island, Ka Ho Reservoir Freshwater Wetland, 22.13478N 113.57333E, ca 54 m, 24IV2019, MAC\_S08\_B01\_Sp.1, F. Brassard leg., Ground bait, IBBL
- 1 worker; Macao, Coloane Island, Ka Ho Reservoir Freshwater Wetland, 22.13478N 113.57333E, ca 54 m, 24IV2019, MAC\_S08\_B04\_Sp.2, F. Brassard leg., Ground bait, IBBL
- 2 workers; Macao, Coloane Island, Ka Ho Reservoir Hillside, 22.13328N 113.57437E, ca 85 m, 24IV2019, MAC\_S09\_B01\_Sp.1, F. Brassard leg., Ground bait, IBBL
- 2 workers; Macao, Coloane Island, Ka Ho Reservoir Hillside, 22.13328N 113.57437E, ca 85 m, 24IV2019, MAC\_S09\_B03\_Sp.1, F. Brassard leg., Ground bait, IBBL
- 2 workers; Macao, Coloane Island, Ka Ho Reservoir Hillside, 22.13328N 113.57437E, ca 85 m, 24IV2019, MAC\_S09\_B04\_Sp.1, F. Brassard leg., Ground bait, IBBL
- 2 workers; Macao, Coloane Island, Coloane Trail near 1-01-15, 22.11507N 113.56448E, ca 83 m, 25IV2019, MAC\_S11\_B06\_Sp.1, F. Brassard leg., Ground bait, IBBL
- 2 workers; Macao, Coloane Island, Coloane Trail near 1-01-15, 22.11507N 113.56448E, ca 83 m, 25IV2019, MAC\_S11\_B07\_Sp.1, F. Brassard leg., Ground bait, IBBL
- 1 worker; Macao, Coloane Island, Coloane Trail near 1-01-15, 22.11507N 113.56448E, ca 83 m, 25IV2019, MAC\_S11\_B08\_Sp.2, F. Brassard leg., Ground bait, IBBL
- 1 worker; Macao, Coloane Island, Coloane North East Hiking Trail, 22.1351N 113.57E, ca 78 m, 4VI2019, MAC\_S12\_B03\_Sp.2, F. Brassard leg., Ground bait, IBBL
- 2 workers; Macao, Coloane Island, Morro de Hac Sa Family Trail near 1-07-08, 22.1144N 113.56988E, ca 53 m, 5VI2019, MAC\_S15\_B01\_Sp.2, F. Brassard leg., Ground bait, IBBL
- 2 workers; Macao, Coloane Island, Morro de Hac Sa Family Trail near 1-07-08, 22.1144N 113.56988E, ca 53 m, 5VI2019, MAC\_S15\_B03\_Sp.2, F. Brassard leg., Ground bait, IBBL
- 1 worker; Macao, Coloane Island, Hillside Department of Green Areas and Gardens, 22.12747N 113.56118E, ca 69 m, 5VI2019, MAC\_S16\_B03\_Sp.2, F. Brassard leg., Ground bait, IBBL
- 2 workers; Macao, Coloane Island, Hillside Department of Green Areas and Gardens, 22.12747N 113.56118E, ca 69 m, 5VI2019, MAC\_S16\_B04\_Sp.1, F. Brassard leg., Ground bait, IBBL
- 1 worker; Macao, Coloane Island, Oscar Farm hillside, 22.1131N 113.5557E, ca 83 m, 8VII2019, MAC\_S18\_B04\_Sp.2, F. Brassard leg., Ground bait, IBBL
- 1 worker; Macao, Coloane Island, Hac Sa Reservoir Family Trail near 1-05-12, 22.1237N 113.5684E, ca 91 m, 23IV2019-7VIII2019, MAC\_S6\_GN1\_H4\_n1, F. Brassard leg., Ground nest, IBBL
- 1 queen; Macao, Coloane Island, Hac Sa Reservoir Family Trail near 1-05-12, 22.1237N 113.5684E, ca 91 m, 23IV2019-7VIII2019, MAC\_S6\_GN1\_H4\_n1, F. Brassard leg., Ground nest, IBBL
- 1 worker; Macao, Coloane Island, Ka Ho Reservoir Freshwater Wetland, 22.13478N 113.57333E, ca 54 m, 24IV2019-27VIII2019, MAC\_S8\_GN1\_H2\_n1\_Sp.1, F. Brassard leg., Ground nest, IBBL
- 1 queen; Macao, Coloane Island, Ka Ho Reservoir Freshwater Wetland, 22.13478N 113.57333E, ca 54 m, 24IV2019-27VIII2019, MAC\_S8\_GN1\_H2\_n1\_Sp.1, F. Brassard leg., Ground nest, IBBL
- 1 worker; Macao, Coloane Island, Ka Ho Reservoir Hillside, 22.13328N 113.57437E, ca 85 m, 24IV2019-27VIII2019, MAC\_S9\_GN8\_H1\_n1, F. Brassard leg., Ground nest, IBBL
- 1 queen; Macao, Coloane Island, Ka Ho Reservoir Hillside, 22.13328N 113.57437E, ca 85 m, 24IV2019-27VIII2019, MAC\_S9\_GN8\_H1\_n1, F. Brassard leg., Ground nest, IBBL
- 1 worker; Macao, Coloane Island, Coloane Trail near C3, 22.1217N 113.556E, ca 105 m, 10VII2019-8X2019, MAC\_S21\_GN2\_H2\_n1, F. Brassard leg., Ground nest, IBBL
- 1 queen; Macao, Coloane Island, Coloane Trail near C3, 22.1217N 113.556E, ca 105 m, 10VII2019-8X2019, MAC\_S21\_GN2\_H2\_n1, F. Brassard leg., Ground nest, IBBL
- 1 worker; Macao, Coloane Island, Coloane Trail near C13, 22.12144N 113.56485E, ca 107 m, 18III2019, MAC\_S01\_LLSA\_sp.6, F. Brassard leg., Leaf litter extraction (standardized area), IBBL



- 3 workers; Macao, Coloane Island, Wetland Alto de Coloane, 22.123N 113.55966E, ca 93 m, 19III2019, MAC\_S02\_LLSA\_Sp.2, F. Brassard leg., Leaf litter extraction (standardized area), IBBL
- 1 worker; Macao, Coloane Island, Hac Sa Reservoir near C21, 22.12659N 113.57272E, ca 69 m, 19III2019, MAC\_S03\_LLSA\_Sp.2, F. Brassard leg., Leaf litter extraction (standardized area), IBBL
- 3 workers; Macao, Coloane Island, Hac Sa Reservoir Family Trail near 1-05-12, 22.1237N 113.5684E, ca 91 m, 8IV2019, MAC\_S06\_LLSA\_Sp.7, F. Brassard leg., Leaf litter extraction (standardized area), IBBL
- 4 workers; Macao, Coloane Island, Ka Ho Reservoir Freshwater Wetland, 22.13478N 113.57333E, ca 54 m, 9IV2019, MAC\_S08\_LLSA\_Sp.4, F. Brassard leg., Leaf litter extraction (standardized area), IBBL
- 2 workers; Macao, Coloane Island, Ka Ho Reservoir Hillside, 22.13328N 113.57437E, ca 85 m, 9IV2019, MAC\_S09\_LLSA\_Sp.2, F. Brassard leg., Leaf litter extraction (standardized area), IBBL
- 2 workers; Macao, Coloane Island, Coloane Trail near 1-01-10, 22.11652N 113.55888E, ca 102 m, 10IV2019, MAC\_S10\_LLSA\_Sp.5, F. Brassard leg., Leaf litter extraction (standardized area), IBBL
- 1 worker; Macao, Coloane Island, Coloane Trail near 1-01-15, 22.11507N 113.56448E, ca 83 m, 11IV2019, MAC\_S11\_LLSA\_Sp.9, F. Brassard leg., Leaf litter extraction (standardized area), IBBL
- 2 workers; Macao, Coloane Island, Coloane North East Hiking Trail, 22.1351N 113.57E, ca 78 m, 14V2019, MAC\_S12\_LLSA\_Sp.3, F. Brassard leg., Leaf litter extraction (standardized area), IBBL
- 2 workers; Macao, Coloane Island, Ka Ho Height Family Trail Peak near 1-09-03, 22.12835N 113.57018E, ca 140 m, 16V2019, MAC\_S14\_LLSA\_Sp.10, F. Brassard leg., Leaf litter extraction (standardized area), IBBL
- 4 workers; Macao, Coloane Island, Ka Ho Height Family Trail Peak near 1-09-03, 22.12835N 113.57018E, ca 140 m, 16V2019, MAC\_S14\_LLSA\_Sp.9, F. Brassard leg., Leaf litter extraction (standardized area), IBBL
- 2 workers; Macao, Coloane Island, Morro de Hac Sa Family Trail near 1-07-08, 22.1144N 113.56988E, ca 53 m, 17V2019, MAC\_S15\_LLSA\_Sp.7, F. Brassard leg., Leaf litter extraction (standardized area), IBBL
- 2 workers; Macao, Coloane Island, Hillside Department of Green Areas and Gardens, 22.12747N 113.56118E, ca 69 m, 20V2019, MAC\_S16\_LLSA\_Sp.12, F. Brassard leg., Leaf litter extraction (standardized area), IBBL
- 1 worker; Macao, Coloane Island, Oscar Farm hillside, 22.1131N 113.5557E, ca 83 m, 24VI2019, MAC\_S18\_LLSA\_Sp.1, F. Brassard leg., Leaf litter extraction (standardized area), IBBL
- 1 worker; Macao, Coloane Island, Coloane Trail near C3, 22.1217N 113.556E, ca 105 m, 27VI2019, MAC\_S21\_LLSA\_Sp.4, F. Brassard leg., Leaf litter extraction (standardized area), IBBL
- 1 queen; Macao, Coloane Island, Coloane Trail near C3, 22.1217N 113.556E, ca 105 m, 27VI2019, MAC\_S21\_LLSA\_Sp.4, F. Brassard leg., Leaf litter extraction (standardized area), IBBL
- 1 worker; Macao, Coloane Island, Coloane Trail near C13, 22.12144N 113.56485E, ca 107 m, 18III2019, MAC\_S01\_LLSP\_sp.5, F. Brassard leg., Leaf litter extraction (species pool), IBBL
- 2 workers; Macao, Coloane Island, Wetland Alto de Coloane, 22.123N 113.55966E, ca 93 m, 19III2019, MAC\_S02\_LLSP\_Sp.6, F. Brassard leg., Leaf litter extraction (species pool), IBBL
- 1 queen; Macao, Coloane Island, Wetland Alto de Coloane, 22.123N 113.55966E, ca 93 m, 19III2019, MAC\_S02\_LLSP\_Sp.6, F. Brassard leg., Leaf litter extraction (species pool), IBBL
- 2 workers; Macao, Coloane Island, Hac Sa Reservoir near C21, 22.12659N 113.57272E, ca 69 m, 19III2019, MAC\_S03\_LLSP\_Sp.5, F. Brassard leg., Leaf litter extraction (species pool), IBBL
- 1 worker; Macao, Coloane Island, Ka Ho Lighthouse 1, 22.12936N 113.59137E, ca 26 m, 20III2019, MAC\_S04\_LLSP\_Sp.5, F. Brassard leg., Leaf litter extraction (species pool), IBBL
- 2 workers; Macao, Coloane Island, Seoc Pai Van Park, 22.12492N 113.55663E, ca 35 m, 20III2019, MAC\_S05\_LLSP\_Sp.5, F. Brassard leg., Leaf litter extraction (species pool), IBBL
- 1 worker; Macao, Coloane Island, Hac Sa Reservoir Family Trail near 1-05-12, 22.1237N 113.5684E, ca 91 m, 8IV2019, MAC\_S06\_LLSP\_Sp.3, F. Brassard leg., Leaf litter extraction (species pool), IBBL

- 1 worker; Macao, Coloane Island, Ka Ho Reservoir Hillside, 22.13328N 113.57437E, ca 85 m, 9IV2019, MAC\_S09\_LLSP\_Sp.1, F. Brassard leg., Leaf litter extraction (species pool), IBBL
- 1 worker; Macao, Coloane Island, Coloane Trail near 1-01-10, 22.11652N 113.55888E, ca 102 m, 10IV2019, MAC\_S10\_LLSP\_Sp.3, F. Brassard leg., Leaf litter extraction (species pool), IBBL
- 2 workers; Macao, Coloane Island, Coloane Trail near 1-01-10, 22.11652N 113.55888E, ca 102 m, 10IV2019, MAC\_S10\_LLSP\_Sp.5, F. Brassard leg., Leaf litter extraction (species pool), IBBL
- 2 workers; Macao, Coloane Island, Coloane Trail near 1-01-15, 22.11507N 113.56448E, ca 83 m, 11IV2019, MAC\_S11\_LLSP\_Sp.1, F. Brassard leg., Leaf litter extraction (species pool), IBBL
- 2 workers; Macao, Coloane Island, Coloane Trail near 1-01-15, 22.11507N 113.56448E, ca 83 m, 11IV2019, MAC\_S11\_LLSP\_Sp.2, F. Brassard leg., Leaf litter extraction (species pool), IBBL
- 2 workers; Macao, Coloane Island, Coloane North East Hiking Trail, 22.1351N 113.57E, ca 78 m, 14V2019, MAC\_S12\_LLSP\_Sp.5, F. Brassard leg., Leaf litter extraction (species pool), IBBL
- 1 worker; Macao, Coloane Island, Ka Ho Height Family Trail Peak near 1-09-03, 22.12835N 113.57018E, ca 140 m, 16V2019, MAC\_S14\_LLSP\_Sp.7, F. Brassard leg., Leaf litter extraction (species pool), IBBL
- 2 workers; Macao, Coloane Island, Ka Ho Height Family Trail Peak near 1-09-03, 22.12835N 113.57018E, ca 140 m, 16V2019, MAC\_S14\_LLSP\_Sp.9, F. Brassard leg., Leaf litter extraction (species pool), IBBL
- 1 worker; Macao, Coloane Island, Morro de Hac Sa Family Trail near 1-07-08, 22.1144N 113.56988E, ca 53 m, 17V2019, MAC\_S15\_LLSP\_Sp.7, F. Brassard leg., Leaf litter extraction (species pool), IBBL
- 2 workers; Macao, Coloane Island, Morro de Hac Sa Family Trail near 1-07-08, 22.1144N 113.56988E, ca 53 m, 17V2019, MAC\_S15\_LLSP\_Sp.9, F. Brassard leg., Leaf litter extraction (species pool), IBBL
- 2 workers; Macao, Coloane Island, Hillside Department of Green Areas and Gardens, 22.12747N 113.56118E, ca 69 m, 20V2019, MAC\_S16\_LLSP\_Sp.5, F. Brassard leg., Leaf litter extraction (species pool), IBBL
- 2 workers; Macao, Coloane Island, Ka Ho Lighthouse 2, 22.12923N 113.59092E, ca 34 m, 21V2019, MAC\_S17\_LLSP\_Sp.11, F. Brassard leg., Leaf litter extraction (species pool), IBBL
- 1 worker; Macao, Coloane Island, Oscar Farm hillside, 22.1131N 113.5557E, ca 83 m, 24VI2019, MAC\_S18\_LLSP\_Sp.9, F. Brassard leg., Leaf litter extraction (species pool), IBBL
- 2 workers; Macao, Coloane Island, Coloane Trail near C3, 22.1217N 113.556E, ca 105 m, 27VI2019, MAC\_S21\_LLSP\_Sp.10, F. Brassard leg., Leaf litter extraction (species pool), IBBL
- 1 worker; Macao, Coloane Island, Ka Ho Reservoir Hillside, 22.13328N 113.57437E, ca 85 m, 9IV2019-24IV2019, MAC\_S9\_37.5\_q2\_Sp.2, F. Brassard leg., Subterranean trap, IBBL
- 2 workers; Macao, Coloane Island, Hillside Department of Green Areas and Gardens, 22.12747N 113.56118E, ca 69 m, 20V2019-5VI2019, MAC\_S16\_25\_q1\_Sp.1, F. Brassard leg., Subterranean trap, IBBL
- 1 worker; Macao, Coloane Island, Hillside Department of Green Areas and Gardens, 22.12747N 113.56118E, ca 69 m, 20V2019-5VI2019, MAC\_S16\_12.5\_q3\_Sp.2, F. Brassard leg., Subterranean trap, IBBL
- 2 workers; Macao, Coloane Island, Hillside Department of Green Areas and Gardens, 22.12747N 113.56118E, ca 69 m, 20V2019-5VI2019, MAC\_S16\_25\_q4\_Sp.1, F. Brassard leg., Subterranean trap, IBBL
- 2 workers; Macao, Coloane Island, Oscar Farm hillside, 22.1131N 113.5557E, ca 83 m, 24VI2019-8VII2019, MAC\_S18\_q3\_12.5\_Sp.1, F. Brassard leg., Subterranean trap, IBBL
- 1 worker; Macao, Ka Ho Reservoir, 14VII2016, CM. Leong Leg.
- 3 workers; Macao, Hac Sa Reservoir, 20VIII2016, CM. Leong Leg.
- 1 worker; Macao, Ka Ho Reservoir, 23VIII2016, CM. Leong Leg.

### ***Tetramorium lanuginosum* Mayr, 1870**

#### **Material examined. MACAO SAR, CHINA**

- 1 worker; Macao, Coloane Island, Ka Ho Lighthouse 1, 22.12936N 113.59137E, ca 26 m, 20III2019, MAC\_S04\_B06\_Sp.1, F. Brassard leg., Ground bait, IBBL

- 1 worker; Macao, Coloane Island, Ka Ho Lighthouse 1, 22.12936N 113.59137E, ca 26 m, 20III2019, MAC\_S04\_B07\_Sp.2, F. Brassard leg., Ground bait, IBBL
- 1 worker; Macao, Coloane Island, Cotai Ecological Zone II, 22.1418N 113.5519E, ca 2 m, 11VII2019, MAC\_S20\_B07\_Sp.1, F. Brassard leg., Ground bait, IBBL
- 2 workers; Macao, Coloane Island, Ka Ho Lighthouse 2, 22.12923N 113.59092E, ca 34 m, 21V2019, MAC\_S17\_LLSA\_Sp.2, F. Brassard leg., Leaf litter extraction (standardized area), IBBL
- 2 workers; Macao, Coloane Island, Cotai Ecological Zone II, 22.1418N 113.5519E, ca 2 m, 26VI2019, MAC\_S20\_LLSP\_Sp.5, F. Brassard leg., Leaf litter extraction (species pool), IBBL • 1 worker; Macao, Guia Hill, 20VIII2016, CM. Leong Leg. • 2 workers; Macao, Guia Hill, 27VIII2016, CM. Leong Leg. • 4 workers; Macao, Hac Sa Reservoir, 2VIII2017, B. Guénard Leg. • 1 worker; Macao, Tai Tam Hill, 2VIII2017, B. Guénard Leg.

***Tetramorium nipponense* Wheeler, 1928**

**Material examined.** MACAO SAR, CHINA

- 1 worker; Macao, Coloane Island, Ka Ho Reservoir Freshwater Wetland, 22.13478N 113.57333E, ca 54 m, 27VIII2019, MAC\_S8\_T1\_2m\_Sp.1, F. Brassard leg., Arboreal bait, IBBL
- 2 workers; Macao, Coloane Island, Hamma Temple Estatua da Deusa A-ma, 22.1237N 113.5636E, ca 161 m, 23IV2019, MAC\_S07\_B02\_Sp.1, F. Brassard leg., Ground bait, IBBL
- 2 workers; Macao, Coloane Island, Hamma Temple Estatua da Deusa A-ma, 22.1237N 113.5636E, ca 161 m, 23IV2019-8VIII2019, MAC\_S7\_GN2\_H4\_n1, F. Brassard leg., Ground nest, IBBL
- 2 queens; Macao, Coloane Island, Hamma Temple Estatua da Deusa A-ma, 22.1237N 113.5636E, ca 161 m, 23IV2019-8VIII2019, MAC\_S7\_GN2\_H4\_n1, F. Brassard leg., Ground nest, IBBL
- 1 worker; Macao, Coloane Island, Hamma Temple Estatua da Deusa A-ma, 22.1237N 113.5636E, ca 161 m, 8IV2019, MAC\_S07\_LLSP\_Sp.4, F. Brassard leg., Leaf litter extraction (species pool), IBBL • 1 worker; Macao, Ka Ho Reservoir, 20VIII2016, MG. Oxalá Leg.

***Tetramorium parvispinum* Emery, 1893**

**Material examined.** MACAO SAR, CHINA • 1 worker; Macao, Ka Ho Reservoir, 14VIII2016, CM. Leong Leg. • 2 workers; Macao, Hac Sa Reservoir, 20VIII2016, CM. Leong Leg.

***Tetramorium simillimum* Smith, 1851**

**Material examined.** MACAO SAR, CHINA • 4 workers; Macao, Ha Sa Reservoir, 2VIII2017, B. Guénard Leg.

***Tetramorium tonganum* Mayr, 1870**

**Material examined.** MACAO SAR, CHINA • 1 worker; Macao, Coloane Island, Coloane Trail near 1-01-10, 22.11652N 113.55888E, ca 102 m, 29VIII2019, MAC\_S10\_T2\_1m\_Sp.2, F. Brassard leg., Arboreal bait, IBBL

***Tetramorium wroughtonii* Forel, 1902**

**Material examined.** MACAO SAR, CHINA

- 2 workers; Macao, Coloane Island, Wetland Alto de Coloane, 22.123N 113.55966E, ca 93 m, 19III2019, MAC\_S02\_B05\_Sp.1, F. Brassard leg., Ground bait, IBBL
- 2 workers; Macao, Coloane Island, Coloane Trail near 1-01-10, 22.11652N 113.55888E, ca 102 m, 25IV2019, MAC\_S10\_B03\_Sp.1, F. Brassard leg., Ground bait, IBBL
- 4 workers; Macao, Coloane Island, Hamma Temple Estatua da Deusa A-ma, 22.1237N 113.5636E, ca 161 m, 8IV2019, MAC\_S07\_LLSA\_Sp.10, F. Brassard leg., Leaf litter extraction (standardized area), IBBL
- 1 worker; Macao, Coloane Island, Coloane Trail near 1-01-15, 22.11507N 113.56448E, ca 83 m, 11IV2019, MAC\_S11\_LLSA\_Sp.8, F. Brassard leg., Leaf litter extraction (standardized area), IBBL
- 2 workers; Macao, Coloane Island, Coloane Trail near 1-01-10, 22.11652N 113.55888E, ca 102 m, 10IV2019, MAC\_S10\_LLSP\_Sp.4, F. Brassard leg., Leaf litter extraction (species pool), IBBL

***Tetramorium* sp. nr. *elisabethae* Forel, 1904**

**Material examined.** MACAO SAR, CHINA • 1 worker; Macao, Coloane Island, Oscar Farm hillside, 22.1131N 113.5557E, ca 83 m, 24VI2019-8VII2019, MAC\_S18\_25\_q1\_Sp.2, F. Brassard leg., Subterranean trap, IBBL

***Tetramorium* sp. 1 BG (*obesum* group Bolton, 1976)**

**Material examined.** MACAO SAR, CHINA

- 1 worker; Macao, Coloane Island, Ka Ho Reservoir Freshwater Wetland, 22.13478N 113.57333E, ca 54 m, 24IV2019-27VIII2019, MAC\_S8\_GN3\_H3\_n1, F. Brassard leg., Ground nest, IBBL
- 1 queen; Macao, Coloane Island, Ka Ho Reservoir Freshwater Wetland, 22.13478N 113.57333E, ca 54 m, 24IV2019-27VIII2019, MAC\_S8\_GN3\_H3\_n1, F. Brassard leg., Ground nest, IBBL
- 1 worker; Macao, Coloane Island, Ka Ho Lighthouse 2, 22.12923N 113.59092E, ca 34 m, 6VI2019-24IX2019, MAC\_S17\_GN1\_H1\_n1, F. Brassard leg., Ground nest, IBBL
- 1 queen; Macao, Coloane Island, Ka Ho Lighthouse 2, 22.12923N 113.59092E, ca 34 m, 6VI2019-24IX2019, MAC\_S17\_GN1\_H1\_n1, F. Brassard leg., Ground nest, IBBL
- 1 worker; Macao, Coloane Island, Oscar Farm hillside, 22.1131N 113.5557E, ca 83 m, 8VII2019-25IX2019, MAC\_S18\_GN3\_H2\_n1, F. Brassard leg., Ground nest, IBBL
- 1 queen; Macao, Coloane Island, Oscar Farm hillside, 22.1131N 113.5557E, ca 83 m, 8VII2019-25IX2019, MAC\_S18\_GN3\_H2\_n1, F. Brassard leg., Ground nest, IBBL
- 1 worker; Macao, Coloane Island, Ka Ho Height Family Trail Peak near 1-09-03, 22.12835N 113.57018E, ca 140 m, 16V2019, MAC\_S14\_LLSA\_Sp.6, F. Brassard leg., Leaf litter extraction (standardized area), IBBL
- 1 worker; Macao, Coloane Island, Ka Ho Lighthouse 2, 22.12923N 113.59092E, ca 34 m, 21V2019, MAC\_S17\_LLSA\_Sp.5, F. Brassard leg., Leaf litter extraction (standardized area), IBBL
- 1 queen; Macao, Coloane Island, Oscar Farm hillside, 22.1131N 113.5557E, ca 83 m, 24VI2019, MAC\_S18\_LLSP\_Sp.13, F. Brassard leg., Leaf litter extraction (species pool), IBBL • 1 worker; Macao, Guia Hill, 18VIII2016, CM. Leong Leg. • 1 worker; Macao, Siu Tam Hill, 26VIII2016, CM. Leong Leg. • 4 workers; Macao, Hac Sa Reservoir, 2VIII2017, B. Guénard Leg.

***Tetramorium* sp. 2 JF**

**Material examined.** MACAO SAR, CHINA

- 2 workers; Macao, Coloane Island, Morro de Hac Sa Family Trail near 1-07-08, 22.1144N 113.56988E, ca 53 m, 12IX2019, MAC\_S15\_T1\_3m\_Sp.2, F. Brassard leg., Arboreal bait, IBBL
- 1 worker; Macao, Coloane Island, Morro de Hac Sa Family Trail near 1-07-08, 22.1144N 113.56988E, ca 53 m, 12IX2019, MAC\_S15\_T1\_4m\_Sp.3, F. Brassard leg., Arboreal bait, IBBL

***Tetramorium* sp. 9 JF**

**Material examined.** MACAO SAR, CHINA

- 1 worker; Macao, Coloane Island, Ka Ho Reservoir Hillside, 22.13328N 113.57437E, ca 85 m, 9IV2019-24IV2019, MAC\_S9\_25\_q1\_Sp.1, F. Brassard leg., Subterranean trap, IBBL
- 2 workers; Macao, Coloane Island, Oscar Farm hillside, 22.1131N 113.5557E, ca 83 m, 24VI2019-8VII2019, MAC\_S18\_q2\_25\_Sp.1, F. Brassard leg., Subterranean trap, IBBL

***Vollenhovia* sp. 1 BG**

**Material examined.** MACAO SAR, CHINA • 1 queen; Macao, Coloane Island, Hac Sa Reservoir Family Trail near 1-05-12, 22.1237N 113.5684E, ca 91 m, 23IV2019-7VIII2019, MAC\_S6\_GN3\_H3\_n1, F. Brassard leg., Ground nest, IBBL

***Vollenhovia* sp. 2 BG**

**Material examined.** MACAO SAR, CHINA

- 1 queen; Macao, Coloane Island, Wetland Alto de Coloane, 22.123N 113.55966E, ca 93 m, 19III2019, MAC\_S02\_LLSP\_Sp.5, F. Brassard leg., Leaf litter extraction (species pool), IBBL
- 1 worker; Macao, Coloane Island, Wetland Alto de Coloane, 22.123N 113.55966E, ca 93 m, 19III2019, MAC\_S02\_LLSP\_Sp.5, F. Brassard leg., Leaf litter extraction (species pool), IBBL

**PONERINAE**

***Anochetus risii* Forel, 1900**

**Material examined.** MACAO SAR, CHINA • 1 worker; Macao, Coloane Island, Coastal\_Trail, 22.1144N 113.56988E, ca 112 m, 5VI2019, FB19180, Siu Yiu leg., Hand collection, IBBL • 1 worker; Macao, Ka Ho Reservoir, 20VIII2016, MG. Oxalá Leg.

***Brachyponera obscurans* Mayr, 1862**

**Material examined.** MACAO SAR, CHINA

- 2 workers; Macao, Coloane Island, Ka Ho Lighthouse 2, 22.12923N 113.59092E, ca 34 m, 6VI2019-24IX2019, MAC\_S17\_GN4\_H3\_n1, F. Brassard leg., Ground nest, IBBL

- 1 worker; Macao, Coloane Island, Ka Ho Height Family Trail Peak near 1-09-03, 22.12835N 113.57018E, ca 140 m, 16V2019, MAC\_S14\_LLSA\_Sp.5, F. Brassard leg., Leaf litter extraction (standardized area), IBBL
- 1 queen; Macao, Coloane Island, Hillside Department of Green Areas and Gardens, 22.12747N 113.56118E, ca 69 m, 20V2019, MAC\_S16\_LLSA\_Sp.1, F. Brassard leg., Leaf litter extraction (standardized area), IBBL
- 2 workers; Macao, Coloane Island, Caesar Golf Center, 22.13505N 113.56115E, ca 7 m, 25VI2019, MAC\_S19\_LLSA\_Sp.4, F. Brassard leg., Leaf litter extraction (standardized area), IBBL
- 1 worker; Macao, Coloane Island, Cotai Ecological Zone II, 22.1418N 113.5519E, ca 2 m, 26VI2019, MAC\_S20\_LLSA\_Sp.3, F. Brassard leg., Leaf litter extraction (standardized area), IBBL
- 1 worker; Macao, Coloane Island, Coloane Trail near C3, 22.1217N 113.556E, ca 105 m, 27VI2019, MAC\_S21\_LLSA\_Sp.5, F. Brassard leg., Leaf litter extraction (standardized area), IBBL
- 2 workers; Macao, Coloane Island, Ka Ho Lighthouse 1, 22.12936N 113.59137E, ca 26 m, 20III2019, MAC\_S04\_LLSP\_Sp.7, F. Brassard leg., Leaf litter extraction (species pool), IBBL
- 1 worker; Macao, Coloane Island, Seoc Pai Van Park, 22.12492N 113.55663E, ca 35 m, 20III2019, MAC\_S05\_LLSP\_Sp.2, F. Brassard leg., Leaf litter extraction (species pool), IBBL
- 1 worker; Macao, Coloane Island, Coloane Trail near 1-01-15, 22.11507N 113.56448E, ca 83 m, 11IV2019, MAC\_S11\_LLSP\_Sp.8, F. Brassard leg., Leaf litter extraction (species pool), IBBL
- 2 workers; Macao, Coloane Island, Ka Ho Height Family Trail Peak near 1-09-03, 22.12835N 113.57018E, ca 140 m, 16V2019, MAC\_S14\_LLSP\_Sp.16, F. Brassard leg., Leaf litter extraction (species pool), IBBL
- 1 worker; Macao, Coloane Island, Ka Ho Lighthouse 2, 22.12923N 113.59092E, ca 34 m, 21V2019, MAC\_S17\_LLSP\_Sp.1, F. Brassard leg., Leaf litter extraction (species pool), IBBL
- 1 worker; Macao, Coloane Island, Oscar Farm hillside, 22.1131N 113.5557E, ca 83 m, 24VI2019, MAC\_S18\_LLSP\_Sp.1, F. Brassard leg., Leaf litter extraction (species pool), IBBL
- 2 workers; Macao, Coloane Island, Caesar Golf Center, 22.13505N 113.56115E, ca 7 m, 25VI2019, MAC\_S19\_LLSP\_Sp.8, F. Brassard leg., Leaf litter extraction (species pool), IBBL
- 1 worker; Macao, Coloane Island, Cotai Ecological Zone II, 22.1418N 113.5519E, ca 2 m, 26VI2019, MAC\_S20\_LLSP\_Sp.1, F. Brassard leg., Leaf litter extraction (species pool), IBBL
- 1 worker; Macao, Coloane Island, Coloane Trail near C3, 22.1217N 113.556E, ca 105 m, 27VI2019-10VII2019, MAC\_S21\_q3\_12.5\_Sp.2, F. Brassard leg., Subterranean trap, IBBL • 1 worker; Macao, Guia Hill, 18VII2016, CM. Leong Leg. • 1 worker; Macao, Guia Hill, 20VIII2016, CM. Leong Leg. • 1 worker; Macao, Hac Sa Reservoir, 20VIII2016, CM. Leong Leg. • 1 worker; Macao, Ka Ho Reservoir, 23VIII2016, CM. Leong Leg. • 1 worker; Macao, Siu Tam Hill, 26VIII2016, CM. Leong Leg. • 1 worker; Macao, Guia Hill, 27VIII2016, CM. Leong Leg. • 2 workers; Macao, Ecological Protection Area I & II, 12I2017, CM. Leong Leg.

***Buniapone amblyops* Emery, 1887**

**Material examined.** MACAO SAR, CHINA

- 2 workers; Macao, Coloane Island, Coloane North East Hiking Trail, 22.1351N 113.57E, ca 78 m, 14V2019-4VI2019, MAC\_S12\_37.5\_q3\_Sp.1, F. Brassard leg., Subterranean trap, IBBL
- 2 workers; Macao, Coloane Island, Coloane North East Hiking Trail, 22.1351N 113.57E, ca 78 m, 14V2019-4VI2019, MAC\_S12\_50\_q4\_Sp.2, F. Brassard leg., Subterranean trap, IBBL

***Diacamma* sp. 1**

**Material examined.** MACAO SAR, CHINA

- 1 worker; Macao, Coloane Island, Hac Sa Reservoir near C21, 22.12659N 113.57272E, ca 69 m, 19III2019, MAC\_S03\_HC\_01\_Sp.3, F. Brassard leg., Hand collection, IBBL
- 1 male; Macao, Coloane Island, Seoc Pai Van Park, 22.12492N 113.55663E, ca 35 m, 20III2019, MAC\_S05\_HC1, F. Brassard leg., Hand collection, IBBL
- 2 workers; Macao, Coloane Island, Morro de Hac Sa Family Trail near 1-07-08, 22.1144N 113.56988E, ca 53 m, 17V2019, MAC\_S15\_LLSA\_Sp.1, F. Brassard leg., Leaf litter extraction (standardized area), IBBL
- 2 workers; Macao, Coloane Island, Oscar Farm hillside, 22.1131N 113.5557E, ca 83 m, 24VI2019, MAC\_S18\_LLSA\_Sp.12, F. Brassard leg., Leaf litter extraction (standardized area), IBBL
- 1 worker; Macao, Coloane Island, Coloane Trail near C3, 22.1217N 113.556E, ca 105 m, 27VI2019, MAC\_S21\_LLSA\_Sp.11, F. Brassard leg., Leaf litter extraction (standardized area), IBBL
- 1 worker; Macao, Coloane Island, Ka Ho Reservoir Hillside, 22.13328N 113.57437E, ca 85 m, 9IV2019, MAC\_S09\_LLSP\_Sp.7, F. Brassard leg., Leaf litter extraction (species pool), IBBL
- 2 workers; Macao, Coloane Island, Morro de Hac Sa Family Trail near 1-07-08, 22.1144N 113.56988E, ca 53 m, 17V2019, MAC\_S15\_LLSP\_Sp.1, F. Brassard leg., Leaf litter extraction (species pool), IBBL
- 2 workers; Macao, Coloane Island, Hillside Department of Green Areas and Gardens, 22.12747N 113.56118E, ca 69 m, 20V2019, MAC\_S16\_LLSP\_Sp.4, F. Brassard leg., Leaf litter extraction (species pool), IBBL
- 1 worker; Macao, Siu Tam Hill, 31VII2015, CM. Leong Leg. • 2 workers; Macao, Ka Ho Reservoir, 14VII2016, CM. Leong Leg. • 1 worker; Macao, Guia Hill, 18VII2016, CM. Leong Leg. • 1 worker; Macao, Hac Sa Reservoir, 9I2017, CM. Leong Leg.

#### *Ectomomyrmex annamitus*

**Material examined.** MACAO SAR, CHINA • 2 workers; Macao, Coloane Island, Oscar Farm hillside, 22.1131N 113.5557E, ca 83 m, 24VI2019-8VII2019, MAC\_S18\_q2\_37.5\_Sp.4, F. Brassard leg., Subterranean trap, IBBL

#### *Ectomomyrmex leeuwenhoecki* Forel, 1886

**Material examined.** MACAO SAR, CHINA

- 1 queen; Macao, Coloane Island, Oscar Farm hillside, 22.1131N 113.5557E, ca 83 m, 8VII2019-25IX2019, MAC\_S18\_GN5\_H4\_n1, F. Brassard leg., Ground nest, IBBL
- 1 worker; Macao, Coloane Island, Coloane Trail near 1-01-10, 22.11652N 113.55888E, ca 102 m, 10IV2019, MAC\_S10\_LLSA\_Sp.7, F. Brassard leg., Leaf litter extraction (standardized area), IBBL
- 2 workers; Macao, Coloane Island, Coloane Trail near 1-01-15, 22.11507N 113.56448E, ca 83 m, 11IV2019, MAC\_S11\_LLSA\_Sp.1, F. Brassard leg., Leaf litter extraction (standardized area), IBBL
- 1 worker; Macao, Coloane Island, Oscar Farm hillside, 22.1131N 113.5557E, ca 83 m, 24VI2019, MAC\_S18\_LLSA\_Sp.14, F. Brassard leg., Leaf litter extraction (standardized area), IBBL • 3 workers; Macao, Tai Tam Hill, 26VIII2016, MG. Oxalá Leg. • 1 worker; Macao, Hac Sa Reservoir, 29VII2017, CM. Leong Leg.

#### *Euponera pilosior* Wheeler, 1928

**Material examined.** MACAO SAR, CHINA

- 2 workers; Macao, Coloane Island, Coloane North East Hiking Trail, 22.1351N 113.57E, ca 78 m, 14V2019-4VI2019, MAC\_S12\_50\_q3\_Sp.1, F. Brassard leg., Subterranean trap, IBBL
- 2 workers; Macao, Coloane Island, Morro de Hac Sa Family Trail near 1-07-08, 22.1144N 113.56988E, ca 53 m, 17V2019-5VI2019, MAC\_S15\_12.5\_q2\_Sp.1, F. Brassard leg., Subterranean trap, IBBL

- 2 workers; Macao, Coloane Island, Morro de Hac Sa Family Trail near 1-07-08, 22.1144N 113.56988E, ca 53 m, 17V2019-5VI2019, MAC\_S15\_12.5\_q4\_Sp.1, F. Brassard leg., Subterranean trap, IBBL
- 2 workers; Macao, Coloane Island, Morro de Hac Sa Family Trail near 1-07-08, 22.1144N 113.56988E, ca 53 m, 17V2019-5VI2019, MAC\_S15\_25\_q4\_Sp.1, F. Brassard leg., Subterranean trap, IBBL
- 1 worker; Macao, Coloane Island, Ka Ho Lighthouse 2, 22.12923N 113.59092E, ca 34 m, 21V2019-6VI2019, MAC\_S17\_12.5\_q1\_01\_Sp.1, F. Brassard leg., Subterranean trap, IBBL
- 1 gyne; Macao, Coloane Island, Ka Ho Lighthouse 2, 22.12923N 113.59092E, ca 34 m, 21V2019-6VI2019, MAC\_S17\_12.5\_q1\_01\_Sp.1, F. Brassard leg., Subterranean trap, IBBL
- 2 workers; Macao, Coloane Island, Ka Ho Lighthouse 2, 22.12923N 113.59092E, ca 34 m, 21V2019-6VI2019, MAC\_S17\_12.5\_q1\_02\_Sp.1, F. Brassard leg., Subterranean trap, IBBL
- 2 workers; Macao, Coloane Island, Ka Ho Lighthouse 2, 22.12923N 113.59092E, ca 34 m, 21V2019-6VI2019, MAC\_S17\_25\_q1\_01\_Sp.1, F. Brassard leg., Subterranean trap, IBBL
- 1 worker; Macao, Coloane Island, Oscar Farm hillside, 22.1131N 113.5557E, ca 83 m, 24VI2019-8VII2019, MAC\_S18\_q2\_12.5\_Sp.2, F. Brassard leg., Subterranean trap, IBBL
- 1 gyne; Macao, Coloane Island, Oscar Farm hillside, 22.1131N 113.5557E, ca 83 m, 24VI2019-8VII2019, MAC\_S18\_q2\_12.5\_Sp.2, F. Brassard leg., Subterranean trap, IBBL
- 1 worker; Macao, Coloane Island, Oscar Farm hillside, 22.1131N 113.5557E, ca 83 m, 24VI2019-8VII2019, MAC\_S18\_q3\_25\_Sp.1, F. Brassard leg., Subterranean trap, IBBL
- 2 workers; Macao, Coloane Island, Oscar Farm hillside, 22.1131N 113.5557E, ca 83 m, 24VI2019-8VII2019, MAC\_S18\_q4\_12.5\_Sp.1, F. Brassard leg., Subterranean trap, IBBL
- 2 workers; Macao, Coloane Island, Cotai Ecological Zone II, 22.1418N 113.5519E, ca 2 m, 26VI2019-11VII2019, MAC\_S20\_q1\_12.5\_01\_Sp.1, F. Brassard leg., Subterranean trap, IBBL
- 2 workers; Macao, Coloane Island, Coloane Trail near C3, 22.1217N 113.556E, ca 105 m, 27VI2019-10VII2019, MAC\_S21\_q4\_25\_Sp.1, F. Brassard leg., Subterranean trap, IBBL
- 1 queen; Macao, Coloane Island, Coloane Trail near C3, 22.1217N 113.556E, ca 105 m, 27VI2019-10VII2019, MAC\_S21\_q4\_37.5\_Sp.1, F. Brassard leg., Subterranean trap, IBBL
- 1 worker; Macao, Ka Ho Reservoir, 14VII2016, CM. Leong Leg.
- 1 alate gyne; Macao, Hac Sa Reservoir, 29VII2017, CM. Leong Leg.
- 1 worker; Macao, Hac Sa Reservoir, 2VIII2017, B. Guénard Leg.

### *Harpegnathos venator* Smith, 1858

**Material examined.** MACAO SAR, CHINA • 1 worker; Macao, Coloane Island, Macau\_Zoo, 22.1251N 113.5568E, ca 47 m, 26III2019, MAC\_ZOO\_HC\_07\_Sp.1, F. Brassard leg., Hand collection, IBBL • 1 worker; Macao, Hac Sa Reservoir, 7VIII2015, CM. Leong Leg. • 1 worker; Macao, Guia Hill, 18VIII2016, CM. Leong Leg. • 1 worker; Macao, Hac Sa Reservoir, 9I2017, CM. Leong Leg.

### *Hypoponera exoecata* Wheeler, 1928

**Material examined.** MACAO SAR, CHINA • 2 workers; Macao, Ka Ho Reservoir, 14VII2016, CM. Leong Leg. • 1 worker; Macao, Hac Sa Reservoir, 20VIII2016, CM. Leong Leg. • 1 worker; Macao, Siu Tam Hill, 26VIII2016, CM. Leong Leg.

- 1 worker; Macao, Coloane Island, Oscar Farm hillside, 22.1131N 113.5557E, ca 83 m, 24VI2019, MAC\_S18\_LLSA\_Sp.7, F. Brassard leg., Leaf litter extraction (standardized area), IBBL



- 2 workers; Macao, Coloane Island, Coloane North East Hiking Trail, 22.1351N 113.57E, ca 78 m, 14V2019, MAC\_S12\_LLSP\_Sp.3, F. Brassard leg., Leaf litter extraction (species pool), IBBL
- 1 worker; Macao, Ka Ho Reservoir, 14VII2016, CM. Leong Leg.

***Hypoponera* sp. mo01**

**Material examined.** MACAO SAR, CHINA • 1 worker; Macao, Ka Ho Reservoir, 14VII2016, CM. Leong Leg.

- 2 workers; Macao, Coloane Island, Ka Ho Reservoir Hillside, 22.13328N 113.57437E, ca 85 m, 9IV2019, MAC\_S09\_LLSA\_Sp.8, F. Brassard leg., Leaf litter extraction (standardized area), IBBL
- 1 worker; Macao, Coloane Island, Coloane North East Hiking Trail, 22.1351N 113.57E, ca 78 m, 14V2019, MAC\_S12\_LLSP\_Sp.2, F. Brassard leg., Leaf litter extraction (standardized area), IBBL
- 1 queen; Macao, Coloane Island, Coloane North East Hiking Trail, 22.1351N 113.57E, ca 78 m, 14V2019, MAC\_S12\_LLSP\_Sp.2, F. Brassard leg., Leaf litter extraction (standardized area), IBBL
- 2 workers; Macao, Coloane Island, Macao Golf & Country Club, 22.12481N 113.57902E, ca 19 m, 15V2019, MAC\_S13\_LLSA\_Sp.5, F. Brassard leg., Leaf litter extraction (standardized area), IBBL
- 1 worker; Macao, Coloane Island, Morro de Hac Sa Family Trail near 1-07-08, 22.1144N 113.56988E, ca 53 m, 17V2019, MAC\_S15\_LLSA\_Sp.4, F. Brassard leg., Leaf litter extraction (standardized area), IBBL
- 1 queen; Macao, Coloane Island, Morro de Hac Sa Family Trail near 1-07-08, 22.1144N 113.56988E, ca 53 m, 17V2019, MAC\_S15\_LLSA\_Sp.4, F. Brassard leg., Leaf litter extraction (standardized area), IBBL
- 2 workers; Macao, Coloane Island, Ka Ho Lighthouse 2, 22.12923N 113.59092E, ca 34 m, 21V2019, MAC\_S17\_LLSP\_Sp.8, F. Brassard leg., Leaf litter extraction (standardized area), IBBL
- 2 workers; Macao, Coloane Island, Ka Ho Reservoir Freshwater Wetland, 22.13478N 113.57333E, ca 54 m, 9IV2019, MAC\_S08\_LLSP\_Sp.5, F. Brassard leg., Leaf litter extraction (species pool), IBBL
- 1 worker; Macao, Coloane Island, Ka Ho Reservoir Hillside, 22.13328N 113.57437E, ca 85 m, 9IV2019, MAC\_S09\_LLSP\_Sp.11, F. Brassard leg., Leaf litter extraction (species pool), IBBL
- 1 worker; Macao, Coloane Island, Coloane Trail near 1-01-15, 22.11507N 113.56448E, ca 83 m, 11IV2019, MAC\_S11\_LLSP\_Sp.10, F. Brassard leg., Leaf litter extraction (species pool), IBBL
- 1 worker; Macao, Coloane Island, Macao Golf & Country Club, 22.12481N 113.57902E, ca 19 m, 15V2019, MAC\_S13\_LLSP\_Sp.4, F. Brassard leg., Leaf litter extraction (species pool), IBBL
- 1 queen; Macao, Coloane Island, Ka Ho Height Family Trail Peak near 1-09-03, 22.12835N 113.57018E, ca 140 m, 16V2019, MAC\_S14\_LLSP\_Sp.12, F. Brassard leg., Leaf litter extraction (species pool), IBBL
- 1 queen; Macao, Coloane Island, Ka Ho Lighthouse 2, 22.12923N 113.59092E, ca 34 m, 21V2019, MAC\_S17\_LLSP\_Sp.5, F. Brassard leg., Leaf litter extraction (species pool), IBBL
- 1 worker; Macao, Coloane Island, Ka Ho Lighthouse 2, 22.12923N 113.59092E, ca 34 m, 21V2019, MAC\_S17\_LLSP\_Sp.5, F. Brassard leg., Leaf litter extraction (species pool), IBBL
- 1 queen; Macao, Coloane Island, Cotai Ecological Zone II, 22.1418N 113.5519E, ca 2 m, 26VI2019, MAC\_S20\_LLSP\_Sp.6, F. Brassard leg., Leaf litter extraction (species pool), IBBL
- 1 queen; Macao, Coloane Island, Ka Ho Reservoir Freshwater Wetland, 22.13478N 113.57333E, ca 54 m, 27VIII2019, MAC\_S8\_T3\_3m\_Sp.1, F. Brassard leg., Arboreal bait, IBBL
- 1 gyne; Macao, Coloane Island, Coloane Trail near 1-01-15, 22.11507N 113.56448E, ca 83 m, 29VIII2019, MAC\_S11\_T4\_4m\_Sp.1, F. Brassard leg., Arboreal bait, IBBL
- 1 worker; Macao, Ka Ho Reservoir, 14VII2016, CM. Leong Leg.

***Leptogenys chinensis* Mayr, 1870**

**Material examined.** MACAO SAR, CHINA • 1 worker; Macao, Tai Tam Hill, 25IX2015, CY. Lei Leg.

***Leptogenys peuqueti* André, 1887**

**Material examined.** MACAO SAR, CHINA

- 1 worker; Macao, Coloane Island, Cotai Ecological Zone II, 22.1418N 113.5519E, ca 2 m, 26VI2019, MAC\_S20\_LLSA\_Sp.1, F. Brassard leg., Leaf litter extraction (standardized area), IBBL
- 1 male; Macao, Coloane Island, Cotai Ecological Zone II, 22.1418N 113.5519E, ca 2 m, 26VI2019, MAC\_S20\_LLSA\_Sp.1, F. Brassard leg., Leaf litter extraction (standardized area), IBBL
- 2 workers; Macao, Coloane Island, Ka Ho Lighthouse 1, 22.12936N 113.59137E, ca 26 m, 20III2019, MAC\_S04\_LLSP\_Sp.8, F. Brassard leg., Leaf litter extraction (species pool), IBBL • 1 worker; Macao, Guia Hill, 15VII2015, CM. Leong Leg. • 1 worker; Macao, Guia Hill, 18VIII2016, CM. Leong Leg. • 1 worker; Macao, Guia Hill, 20VIII2016, CM. Leong Leg. • 1 worker; Macao, Guia Hill, 27VIII2016, CM. Leong Leg.
- 1 worker; Macao, Hac Sa Reservoir, 29VII2017, CM. Leong Leg.

***Odontoponera denticulata* Smith, 1858**

**Material examined.** MACAO SAR, CHINA

- 1 worker; Macao, Coloane Island, Government\_Office, 22.1274N 113.5589E, ca 7 m, 26III2019, MAC\_GOV\_HC\_01\_Sp.1, F. Brassard leg., Hand collection, IBBL
- 1 worker; Macao, Coloane Island, Ka Ho Reservoir Hillside, 22.13328N 113.57437E, ca 85 m, 9IV2019, MAC\_S09\_LLSA\_Sp.3, F. Brassard leg., Leaf litter extraction (standardized area), IBBL
- 1 worker; Macao, Coloane Island, Oscar Farm hillside, 22.1131N 113.5557E, ca 83 m, 24VI2019, MAC\_S18\_LLSA\_Sp.13, F. Brassard leg., Leaf litter extraction (standardized area), IBBL
- 1 worker; Macao, Coloane Island, Hac Sa Reservoir near C21, 22.12659N 113.57272E, ca 69 m, 19III2019, MAC\_S03\_LLSP\_Sp.1, F. Brassard leg., Leaf litter extraction (species pool), IBBL
- 1 worker; Macao, Coloane Island, Coloane Trail near 1-01-15, 22.11507N 113.56448E, ca 83 m, 11IV2019, MAC\_S11\_LLSP\_Sp.13, F. Brassard leg., Leaf litter extraction (species pool), IBBL
- 1 worker; Macao, Guia Hill, 15VII2015, CM. Leong Leg. • 1 worker; Macao, Ka Ho Reservoir, 23VIII2015, CM. Leong Leg. • 1 worker; Macao, Tai Tam Hill, 29VII2015, CM. Leong Leg. • 1 worker; Macao, Siu Tam Hill, 25IX2015, CY. Lei Leg. • 1 worker; Macao, Siu Tam Hill, 12X2015, CY. Lei Leg. • 1 worker; Macao, Ka Ho Reservoir, 14VII2016, CM. Leong Leg. • 1 worker; Macao, Guia Hill, 18VIII2016, CM. Leong Leg. • 1 worker; Macao, Hac Sa Reservoir, 9I2017, CM. Leong Leg.

***Pseudoneoponera rufipes* Jerdon, 1851**

**Material examined.** MACAO SAR, CHINA

- 1 worker; Macao, Coloane Island, Hac Sa Reservoir near C21, 22.12659N 113.57272E, ca 69 m, 19III2019, MAC\_S03\_LLSA\_Sp.1, F. Brassard leg., Leaf litter extraction (standardized area), IBBL
- 1 worker; Macao, Coloane Island, Hamma Temple Estatua da Deusa A-ma, 22.1237N 113.5636E, ca 161 m, 8IV2019, MAC\_S07\_LLSA\_Sp.9, F. Brassard leg., Leaf litter extraction (standardized area), IBBL

• 1 worker; Macao, Hac Sa Reservoir, 7VIII2015, CM. Leong Leg. • 1 worker; Macao, Ka Ho Reservoir, 14VII2016, CM. Leong Leg.

## PROCERATIINAE

### *Probolomyrmex dabermanii*

**Material examined.** MACAO SAR, CHINA • 1 worker; Macao, Gui Hill, 25VI2018, CM. Leong leg., IBBL

### *Proceratium* sp. cf. *bruelheidei* Staab, Xu & Hita Garcia, 2018

**Material examined.** MACAO SAR, CHINA • 1 queen; Macao, Coloane Island, Seoc Pai Van Park, 22.12492N 113.55663E, ca 35 m, 20III2019, MAC\_S05\_LLSP\_Sp.1, F. Brassard leg., Leaf litter extraction (species pool), IBBL

## PSEUDOMYRMICINAE

### *Tetraponera allaborans* Walker, 1859

**Material examined.** MACAO SAR, CHINA • 1 worker; Macao, Guia Hill, 27VIII2016, CM. Leong Leg.

### *Tetraponera binghami* Forel, 1902

**Material examined.** MACAO SAR, CHINA • 2 workers; Macao, Coloane Island, Coloane North East Hiking Trail, 22.1352N 113.5695E, ca 77 m, 14V2019, FB19140, F. Brassard leg., Hand collection, IBBL

### *Tetraponera nitida* Smith, 1860

**Material examined.** MACAO SAR, CHINA

- 1 worker; Macao, Coloane Island, IAM\_Government, 22.125235N 113.558378E, ca 23 m, 9VI2019, T.nitida\_GOV\_2019, F. Brassard leg., Hand collection, IBBL
- 1 worker; Macao, Coloane Island, IAM\_Government, 22.125235N 113.558378E, ca 23 m, 9VI2019, T.nitida\_GOV\_2019, F. Brassard leg., Hand collection, IBBL
